# Supplementary material
Source: publisher figshare collection journal article supplement (https://future-science-group.figshare.com/ndownloader/files/30941593)
Supplement: Supplementary file 1 [file 30941593]

**Supplementary Material for Review**

**Biological Evaluation**

**1. HUVECs Cytotoxicity Evaluation**

**Table S1. HUVECs IC50 of test compounds.**

| Code | Concentrations | | | | | IC50 (μM) |
| --- | --- | --- | --- | --- | --- | --- |
| **101** | **100** | **10-1** | **10-2** | **10-3** |
| PB1 | 38.16 | 26.63 | 24.15 | 5.59 | 4.74 | >10 |
| PB2 | 38.65 | 14.51 | 3.62 | 3.51 | 2.59 | >10 |
| PB3 | 62.15 | 44.28 | 32.65 | 31.47 | 4.58 | 2 |
| PB4 | 55.62 | 32.15 | 14.46 | 5.54 | 3.11 | 6 |
| PB5 | 28.41 | 18.65 | 12.34 | 10.22 | 3.34 | >10 |
| PB6 | 37.45 | 36.54 | 12.84 | 11.64 | 5.85 | >10 |
| PB7 | 55.41 | 28.16 | 17.48 | 12.61 | 2.59 | 6 |
| PB8 | 45.65 | 38.71 | 22.36 | 15.56 | 5.68 | >10 |
| PB9 | 55.61 | 46.74 | 15.62 | 13.71 | 1.54 | 2 |
| PB10 | 41.15 | 43.62 | 18.57 | 12.44 | 13.56 | >10 |
| PB11 | 64.82 | 56.77 | 48.27 | 12.46 | 3.64 | 0.1 |
| PB12 | 57.49 | 38.51 | 32.11 | 17.85 | 5.65 | 4 |
| PB13 | 35.62 | 28.47 | 17.59 | 14.51 | 3.66 | >10 |
| PB14 | 43.59 | 41.28 | 13.59 | 4.37 | 1.71 | >10 |
| PB15 | 45.62 | 28.91 | 17.55 | 14.51 | 5.62 | >10 |
| PB16 | 67.95 | 64.28 | 45.62 | 13.28 | 1.28 | 0.1 |
| PB17 | 41.28 | 32.95 | 17.74 | 13.26 | 3.51 | >10 |
| PB18 | 38.64 | 27.66 | 23.44 | 12.54 | 3.73 | >10 |
| PB19 | 35.64 | 32.41 | 18.51 | 11.56 | 2.66 | >10 |
| PB20 | 45.21 | 32.59 | 17.74 | 5.84 | 2.45 | >10 |
| PB21 | 46.38 | 44.51 | 13.62 | 18.74 | 3.95 | >10 |
| B1 | 77.56 | 54.28 | 18.62 | 12.55 | 3.22 | 0.7 |
| B2 | 54.25 | 32.65 | 12.62 | 5.65 | 3.15 | 6 |
| B3 | 66.74 | 32.51 | 12.59 | 2.36 | 1.44 | 3 |
| B4 | 44.21 | 32.15 | 12.62 | 3.62 | 1.12 | >10 |
| B5 | 45.65 | 33.28 | 18.17 | 12.55 | 1.41 | >10 |
| B6 | 48.57 | 32.99 | 16.95 | 14.51 | 10.2 | >10 |
| B7 | 68.95 | 41.25 | 23.65 | 5.28 | 1.58 | 2 |
| B8 | 45.68 | 32.66 | 12.84 | 10.58 | 4.57 | >10 |
| STSa |  | - | - | - | - | 0.6 |

aSTS represents Staurosporine.

**2. VEGFR-2 Inhibition Assay**

**Table S2. VEGFR-2 IC50 of test compounds.**

| Code | Concentrations | | | | | IC50 (μM) |
| --- | --- | --- | --- | --- | --- | --- |
| **101** | **100** | **10-1** | **10-2** | **10-3** |
| PB3 | 65.02 | 41.35 | 18.54 | 6.32 | 3.22 | 2 |
| PB4 | 68.82 | 41.25 | 13.22 | 10.62 | 5.28 | 2 |
| PB7 | 36.85 | 16.22 | 3.62 | 1.55 | 1.21 | >10 |
| PB9 | 48.32 | 35.41 | 22.14 | 10.95 | 2.62 | >10 |
| PB11 | 71.66 | 54.11 | 12.62 | 3.62 | 1.05 | 0.8 |
| PB12 | 61.23 | 48.11 | 12.36 | 2.36 | 1.41 | 1 |
| PB16 | 68.24 | 58.85 | 16.57 | 12.51 | 6.54 | 0.6 |
| B1 | 66.23 | 58.62 | 44.23 | 6.31 | 1.28 | 0.2 |
| B2 | 58.12 | 54.26 | 31.54 | 2.36 | 2.24 | 0.5 |
| B3 | 61.55 | 42.62 | 5.62 | 1.06 | 1.62 | 2 |
| B7 | 71.45 | 39.65 | 34.15 | 3.12 | 1.11 | 2 |
| STSa | - | - | - | - | - | 0.6 |

aSTS represents Staurosporine.

**3. Cellular Migration Assay**

**Table S3. Migration assay.**

| Samples | % wound healing | | | | | p-value (student’s unpaired t-test) |
| --- | --- | --- | --- | --- | --- | --- |
| Field 1 | Field 2 | Field 3 | Avg | STDEV |
| Untreated | 79.41 | 82.11 | 74.58 | 78.7 | 3.1 | - |
| Staurosporine | 28.65 | 14.74 | 21.25 | 21.5 | 5.7 | ≤0.0001 |
| B1 | 35.62 | 34.51 | 28.32 | 32.8 | 3.2 |
| B2 | 25.62 | 28.95 | 33.64 | 29.4 | 3.3 |
| PB16 | 31.59 | 38.64 | 25.45 | 31.9 | 5.4 |

**
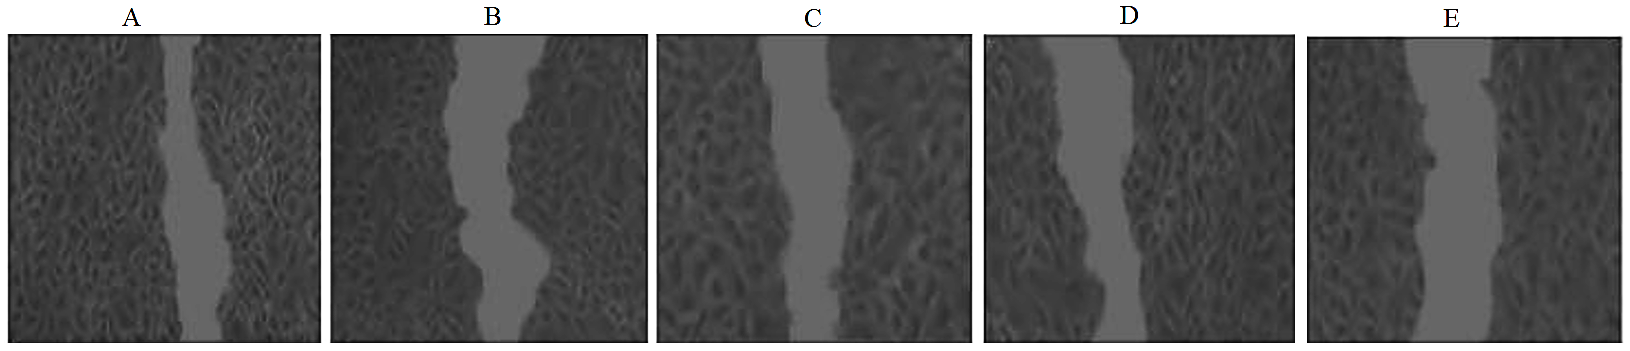
**

Figure S1. Migration Assay of HUVECs after 8 h of (A) untreated, (B) staurosporine (10 µM), (C) B1 (10 µM), (D) B2 (10 µM), and (E) PB16 (10 µM) treatments.

**4. Tube Formation Assay**

**Table S4. Tube formation assay.**

| Samples | Field 1 | Field 2 | Field 3 | Avg | STDEV | p-value (student’s unpaired t-test) |
| --- | --- | --- | --- | --- | --- | --- |
| Untreated | 25 | 29 | 34 | 29.3 | 4.5 | - |
| Staurosporine | 4 | 7 | 9 | 6.7 | 2.5 | ≤0.001 |
| B1 | 18 | 14 | 12 | 14.7 | 3.1 | ≤0.001 |
| B2 | 16 | 18 | 12 | 15.3 | 3.1 | ≤0.01 |
| PB16 | 14 | 16 | 21 | 17.0 | 3.6 | ≤0.01 |

**
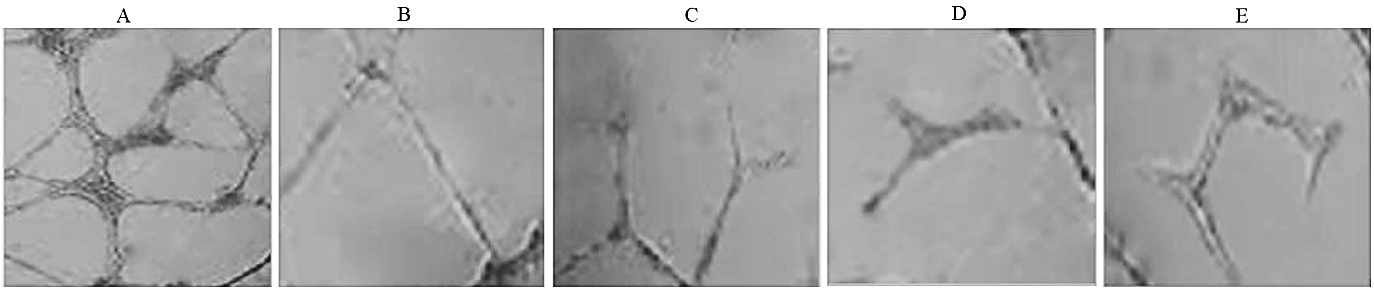
**

Figure S2. Tube Formation Assay of HUVECs after 48 h of (A) untreated, (B) staurosporine (10 µM), (C) B1 (10 µM), (D) B2 (10 µM), and (E) PB16 (10 µM) treatments.

**5. CAM Assay**

**Table S5. CAM assay of compounds.**

| Samples | SCORE | | | | | Avg | Stdev | p-value (student’s unpaired t-test) |
| --- | --- | --- | --- | --- | --- | --- | --- | --- |
| 1 | 2 | 3 | 4 | 5 |
| Untreated | 11 | 12 | 14 | 12 | 11 | 12.0 | 1.2 | - |
| Staurosporine | 0 | 1 | 1 | 2 | 1 | 1.0 | 0.7 | ≤0.00001 |
| B1 | 6 | 7 | 11 | 9 | 6 | 7.8 | 2.2 | ≤0.001 |
| PB16 | 9 | 9 | 6 | 10 | 8 | 8.4 | 1.5 | ≤0.001 |

**
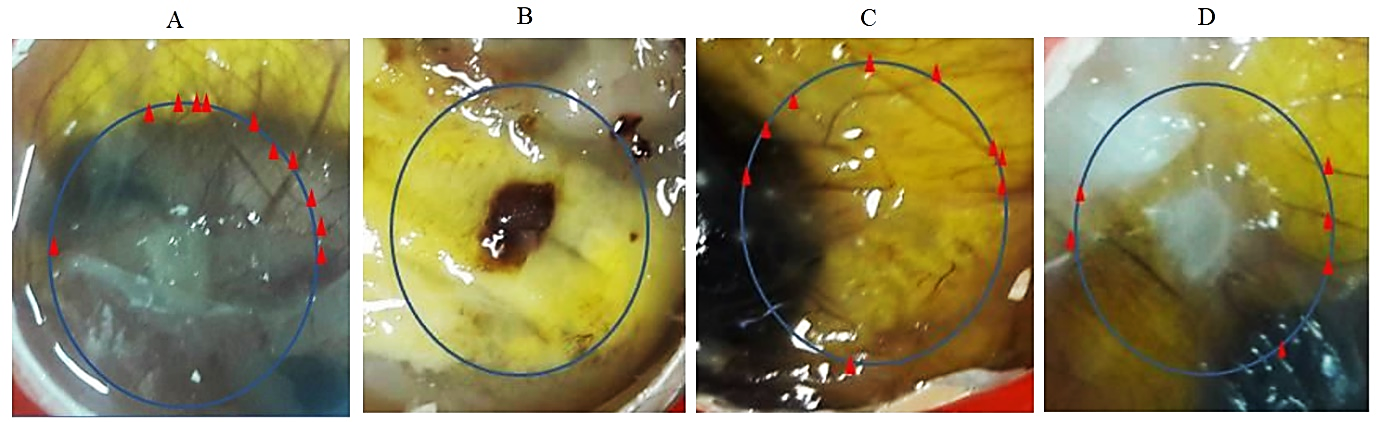
**

Figure S3. CAM Assay of (A) untreated, (B) staurosporine (10 µg/µL), (C) B1 (10 µg/µL), and (D) PB16 (10 µg/µL) treatments.

**6. Molecular Docking**

Table S6: Docking Scores for indicated compound docked into 4 different crystal structures of VEGFR-2. Columns with scores are headed by PDB-ID’s.

|  | **GBVI/WSA dG Score** | | | |
| --- | --- | --- | --- | --- |
| **Compounds** | **3VHE** | **3WZE** | **6XVK** | **4ASD** |
| (S)-B1 | -11.6 | 11.1 | -11.9 | -12.0 |
| (R)-B1 | -11.7 | 11.0 | -11.7 | -11.5 |
| PB16 | -10.2 | -10.1 | -10.1 | -9.8 |


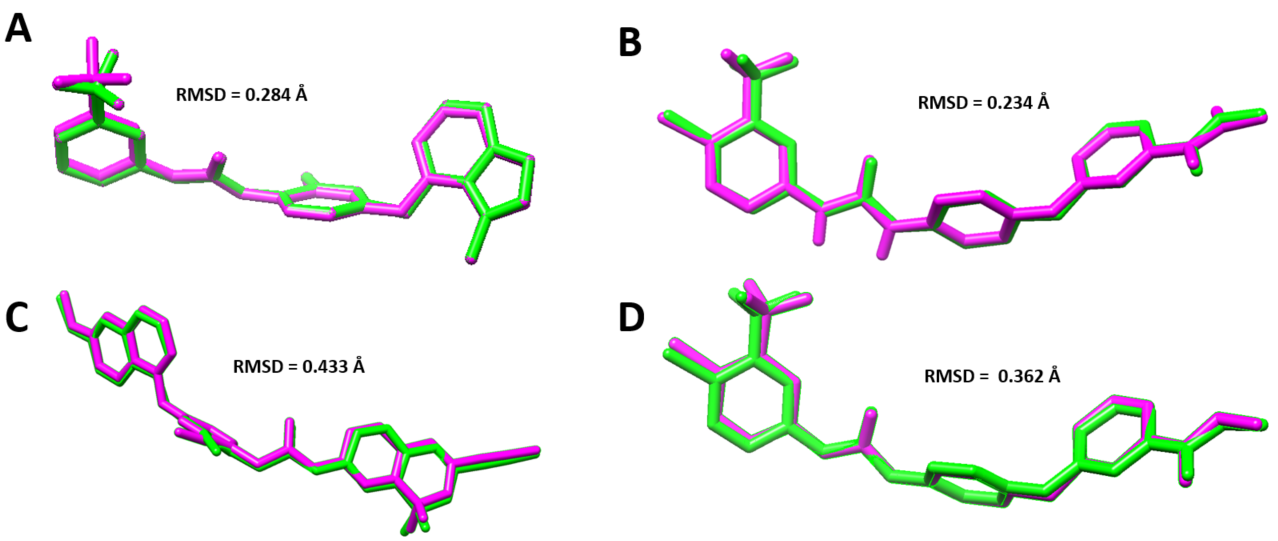


Figure S4: Redocking of ligands into crystal structures of VEGFR-2 with the following PDB-ID’s: A) 3VHE, B) 3WZE, C) 6XVK and D) 4ASD. The RMSD-values between redocked and crystallized ligand are indicated and demonstrate excellent overlap and suitability of the applied docking protocol.


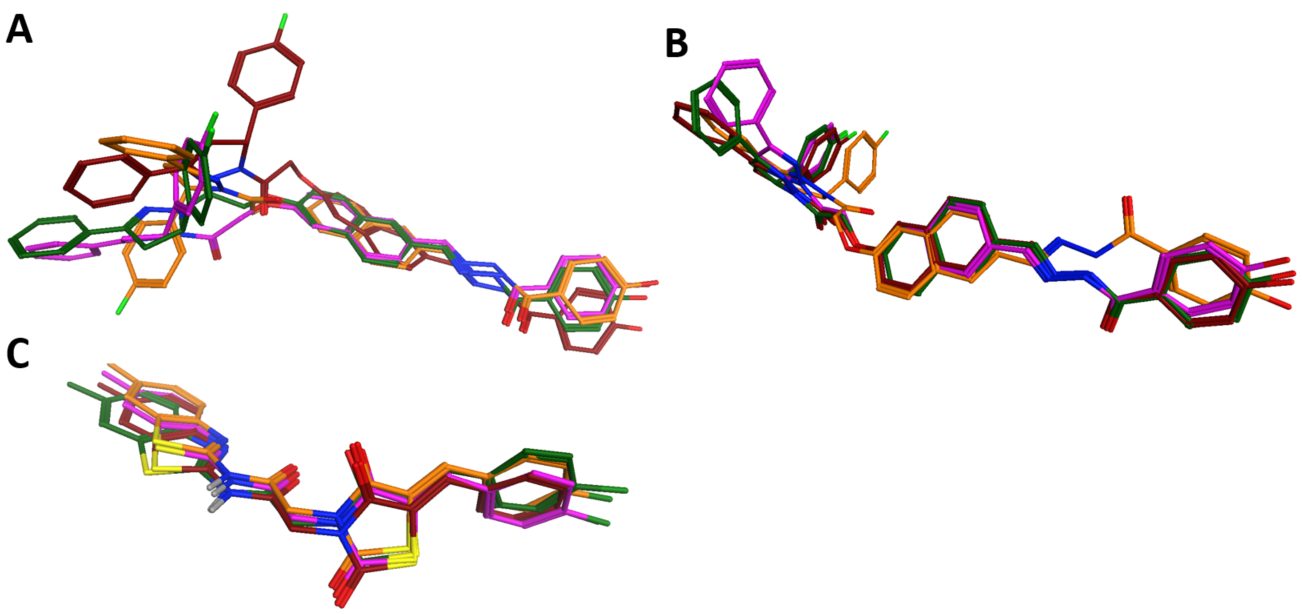


Figure S5: Overlay of docking poses of A) **(S)-B1**, B) **(R)-B1** and C) **PB16** into four different crystal structures of VEGFR-2 receptor. Docking poses are colored according to the corresponding receptor structure with the following PDB-ID’s: 3VHE (green), 3WZE (magenta), 6XVK (orange), 4ASD (dark brown)


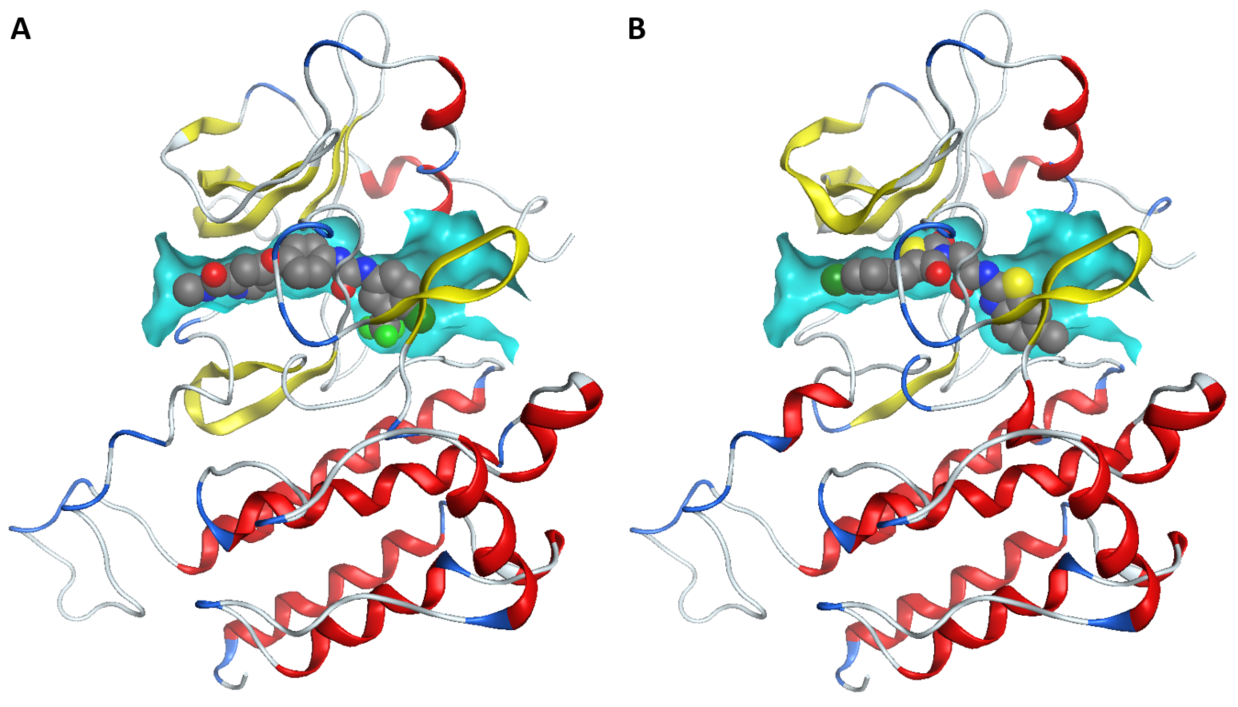


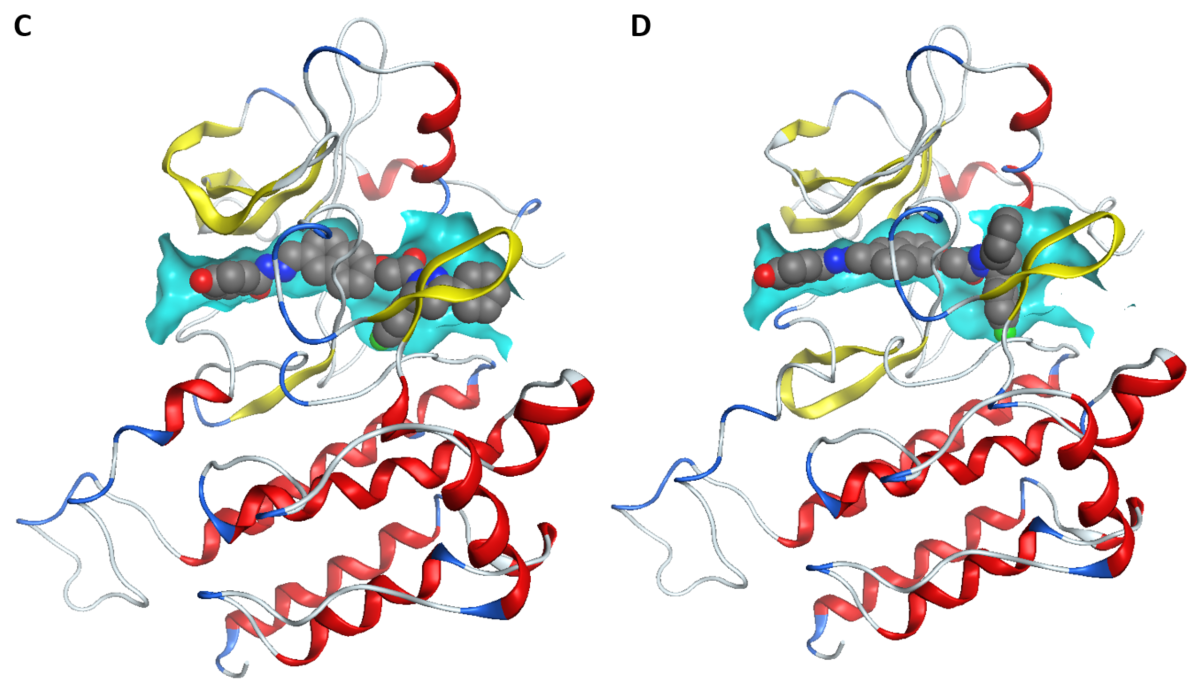


Figure S6: Overall structures of VEGFR-2 in complex with A) sorafenib (PDB-ID: 3WZE), B) **PB16**, C) **(S)-B1**, and D) **(R)-B1**. The surface of the binding channel is clipped and colored cyan.

**Structural characterization**

2-(2,4-dioxo-5-(pyridin-2-ylmethylene)thiazolidin-3-yl)-N-(6-nitrobenzo[d]thiazol-2-yl)acetamide (PB1)

1. FTIR


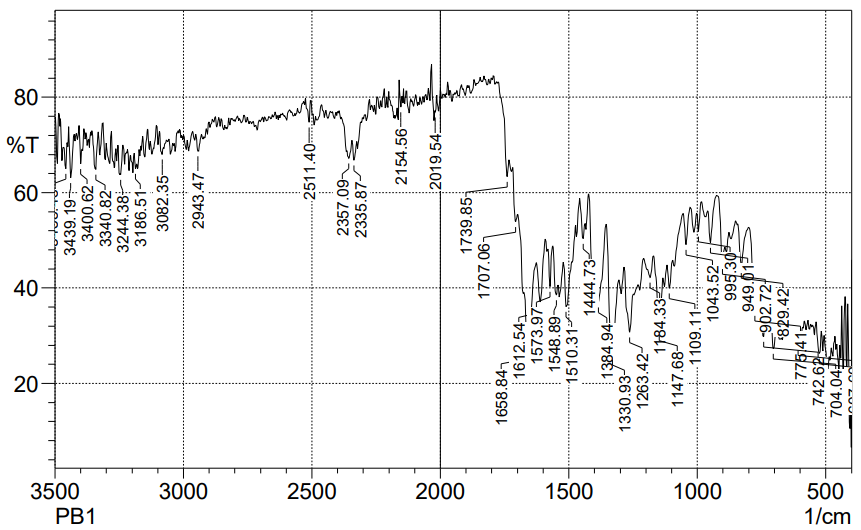


2. 1H-NMR


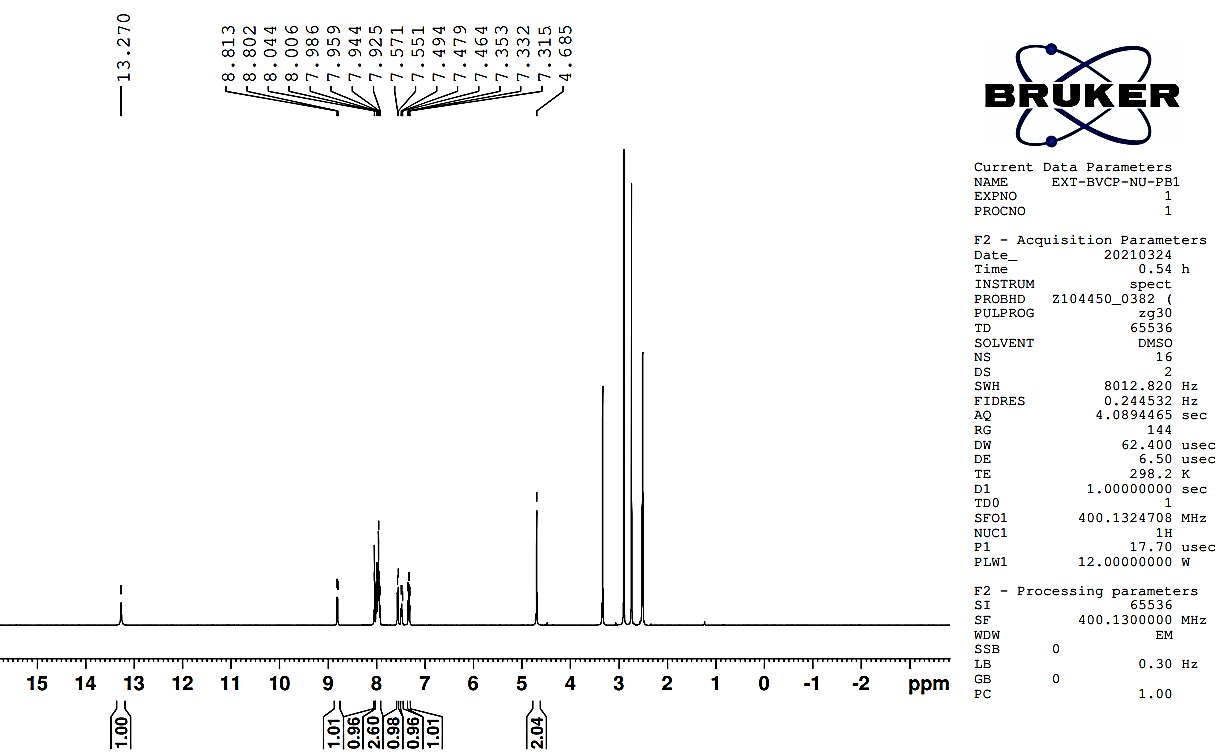


3. 13C-NMR


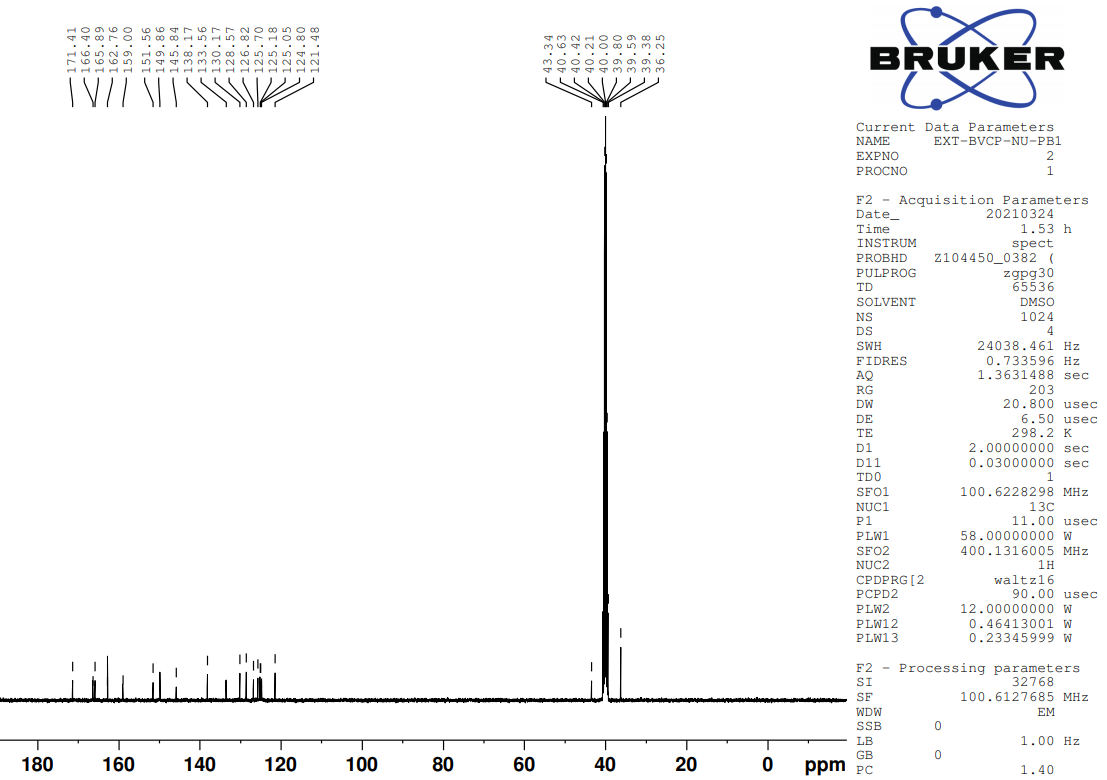


4. HPLC


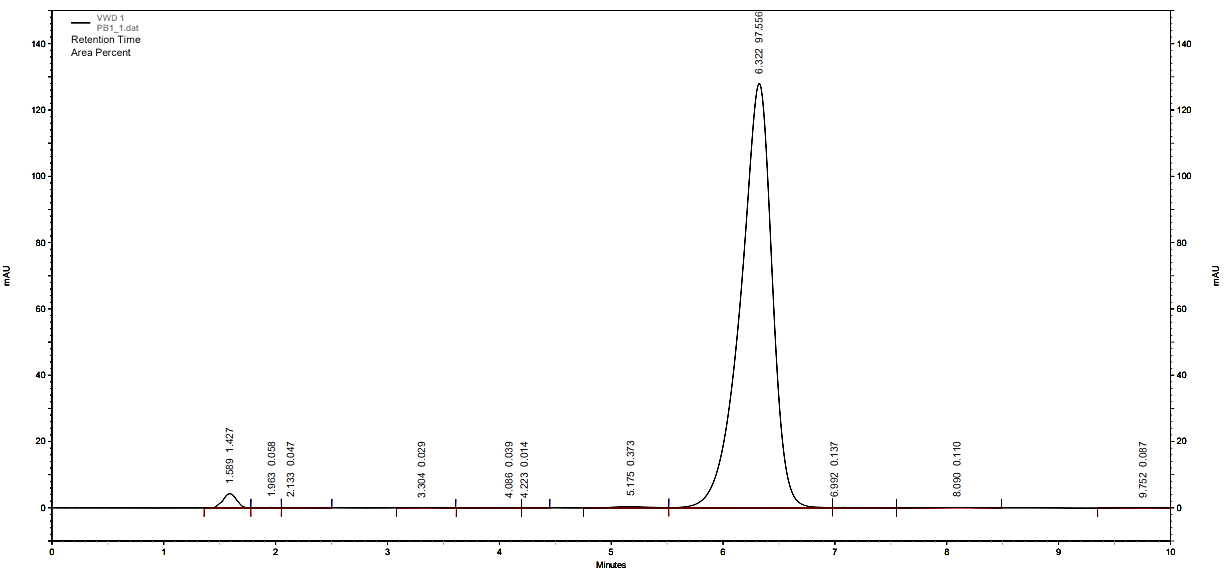


5. Mass


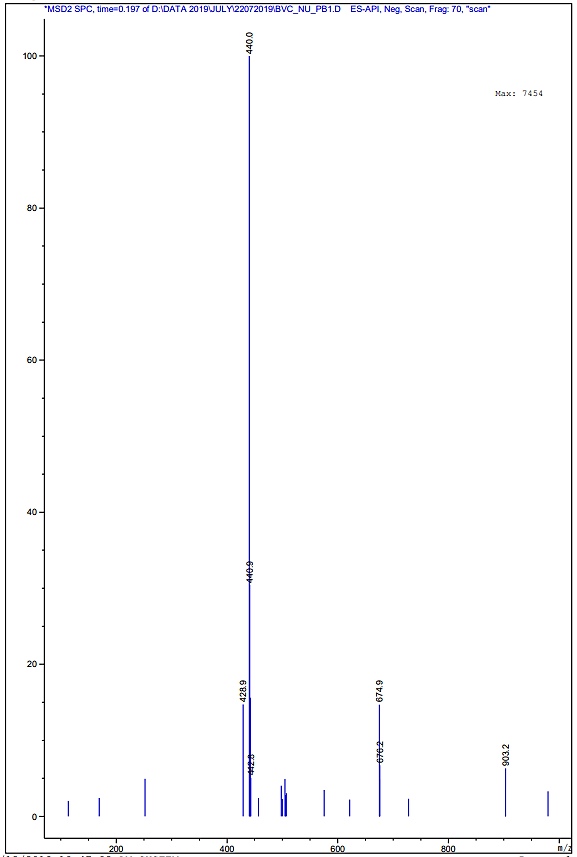


2-(2,4-dioxo-5-(pyridin-2-ylmethylene)thiazolidin-3-yl)-N-(4-methylbenzo[d]thiazol-2-yl)acetamide (PB2)

1. FTIR


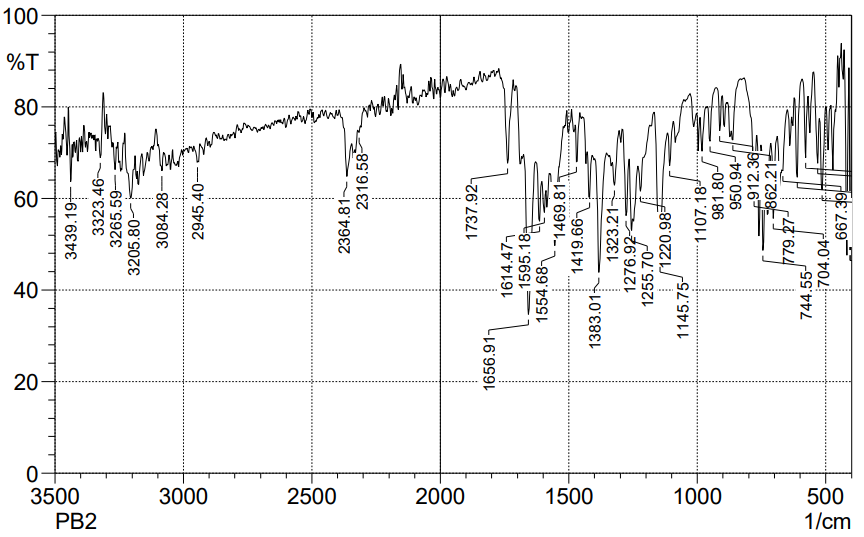


2. 1H-NMR


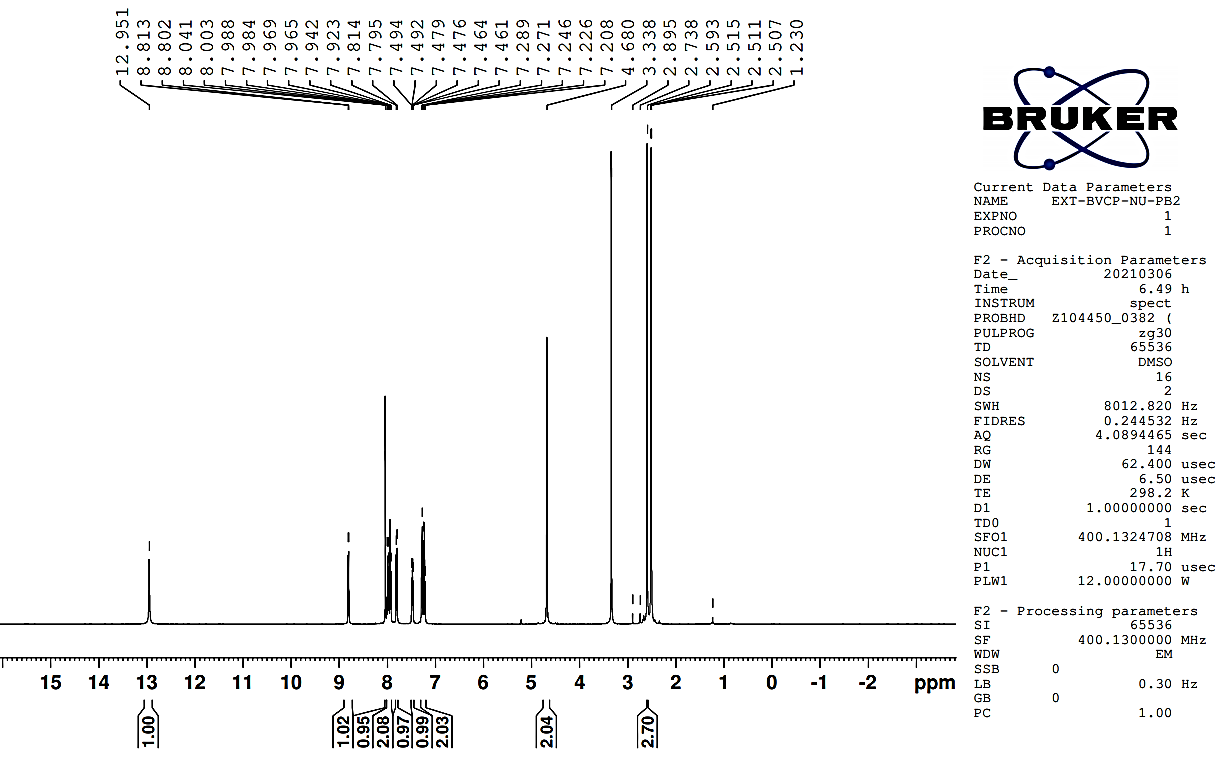


3. 13C-NMR


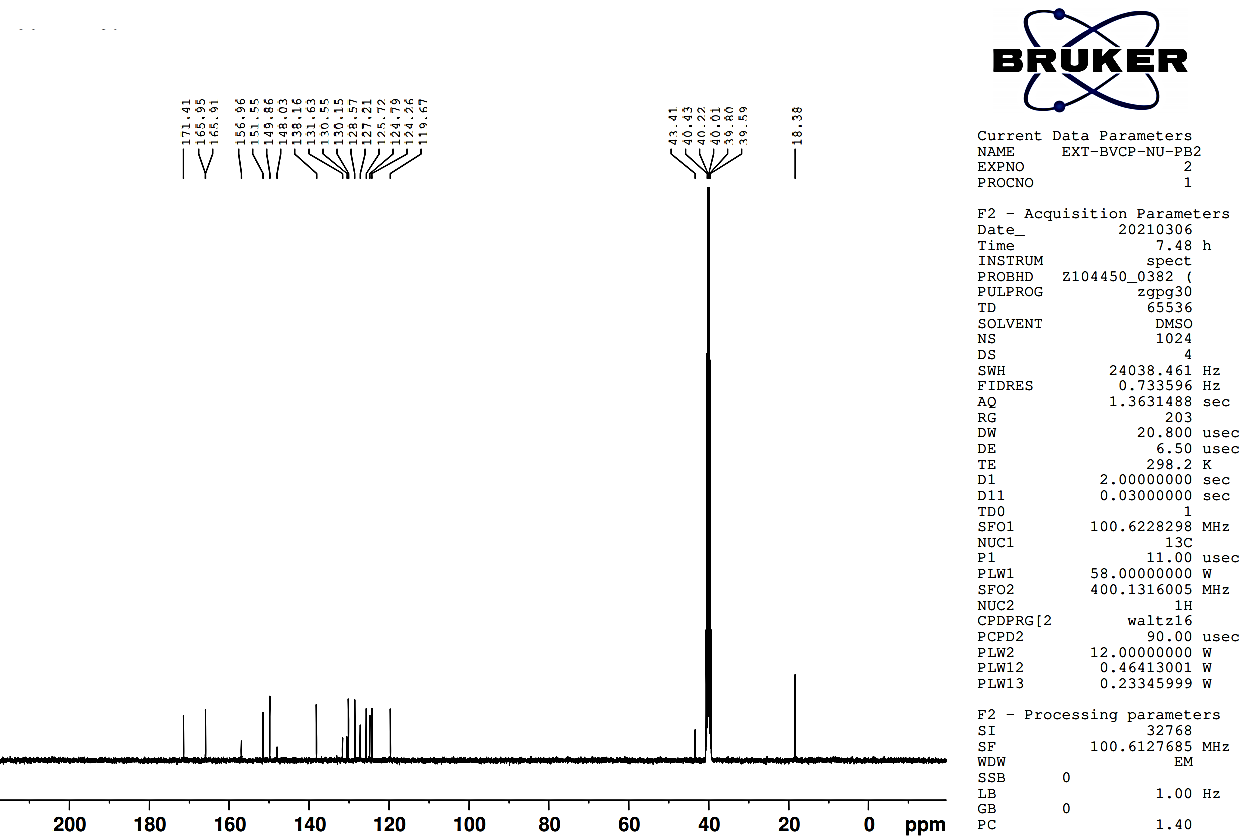


4. HPLC


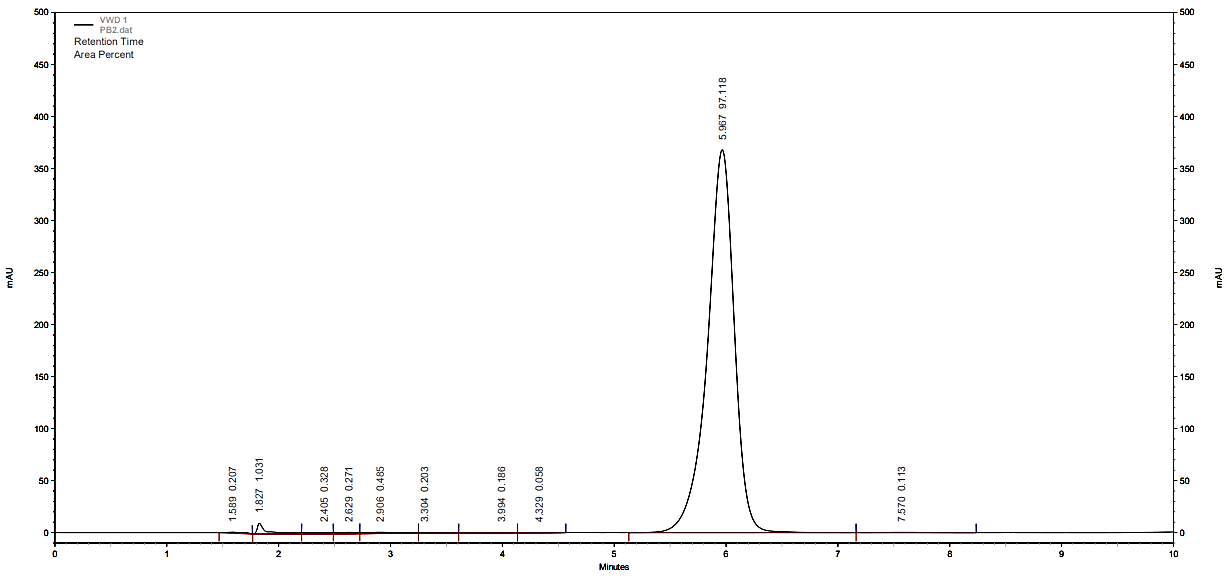


5. Mass


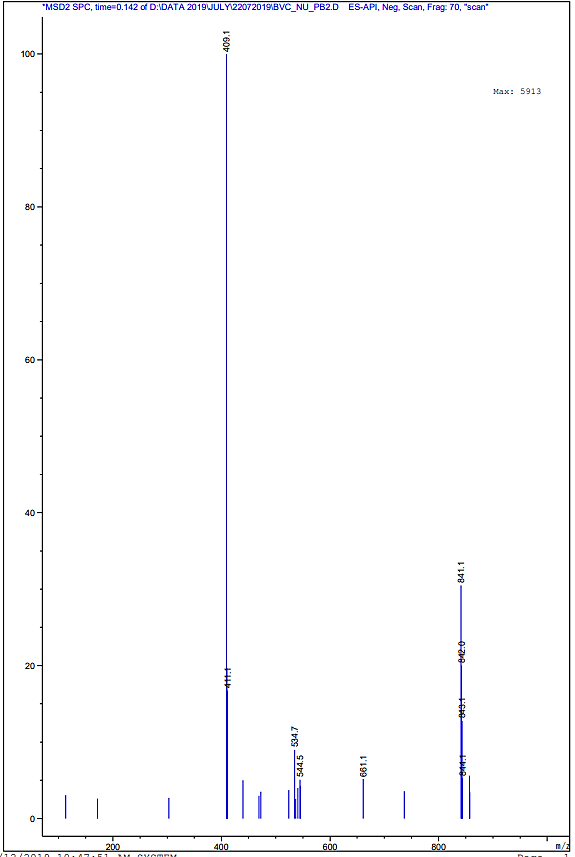


2-(2,4-dioxo-5-(pyridin-2-ylmethylene)thiazolidin-3-yl)-N-(6-methylbenzo[d]thiazol-2-yl)acetamide (PB3)

1. FTIR


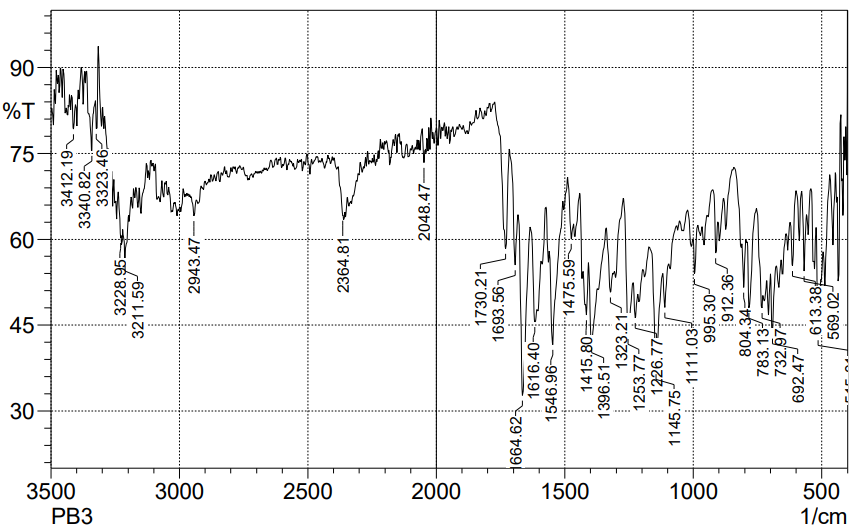


2. 1H-NMR


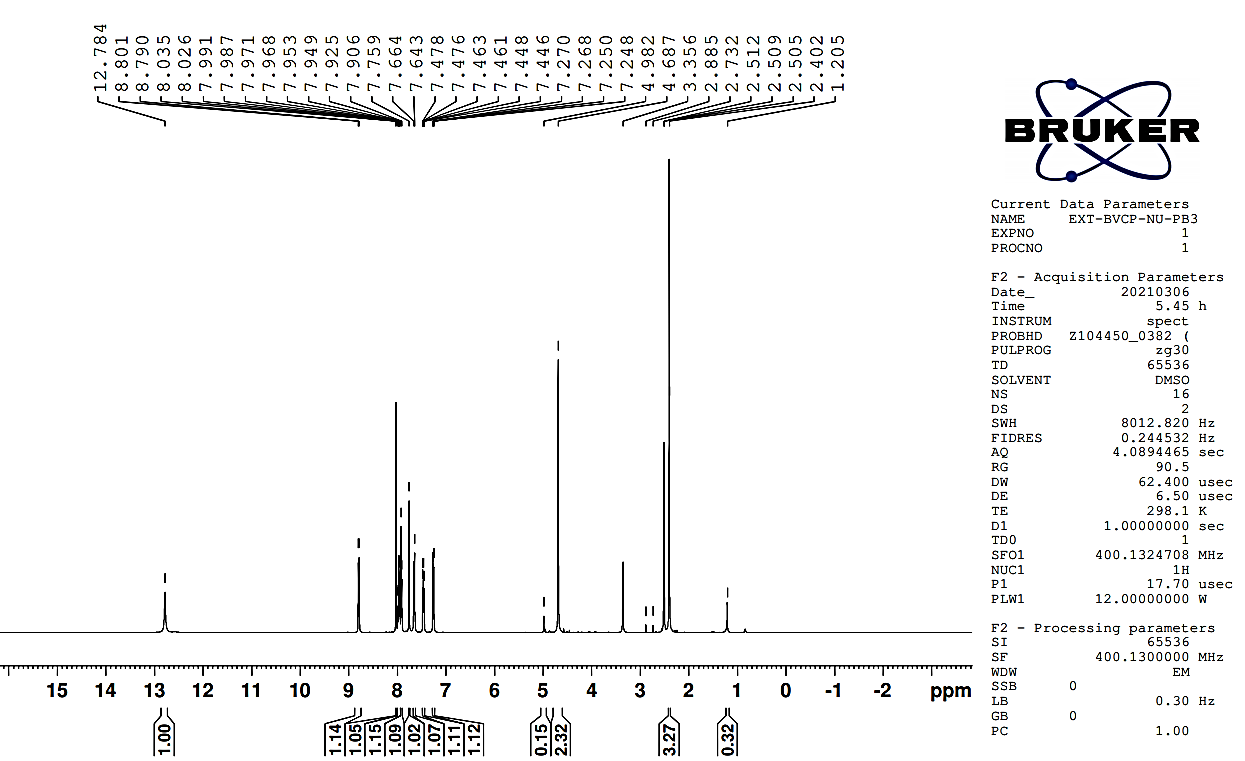


3. 13C-NMR


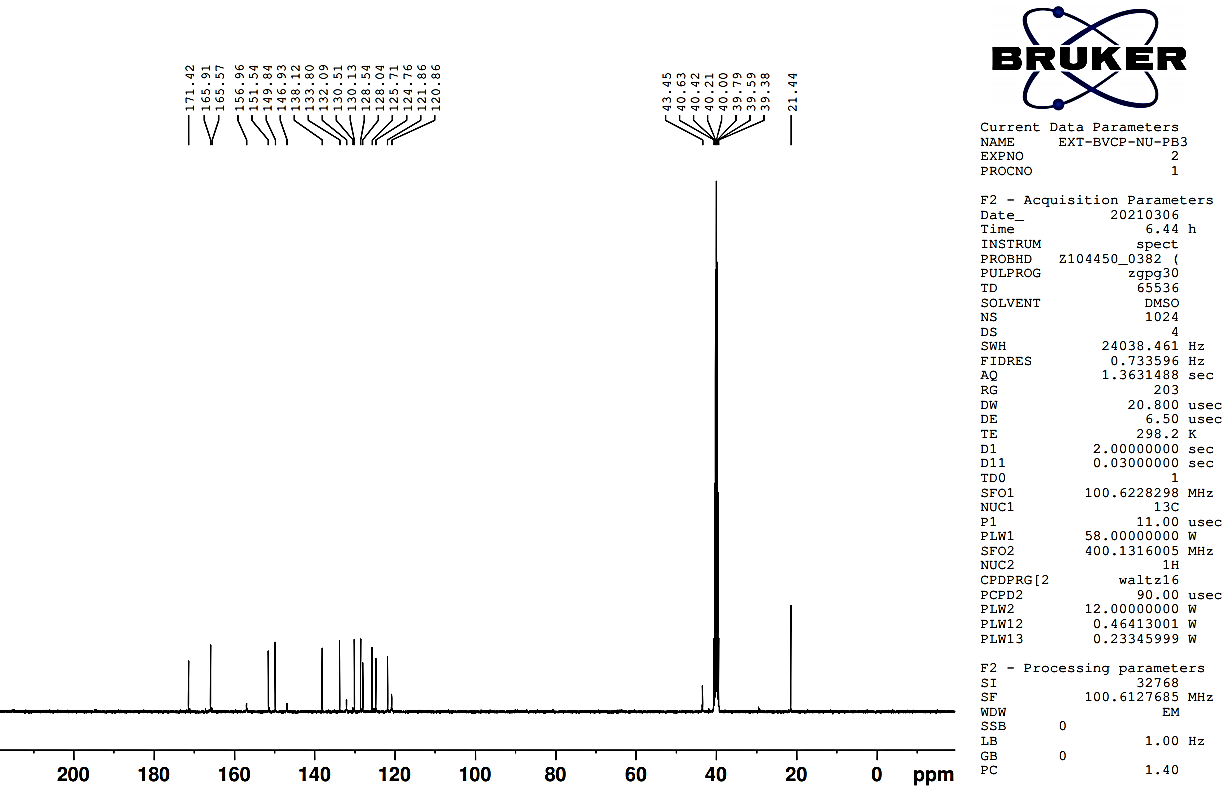


4. HPLC


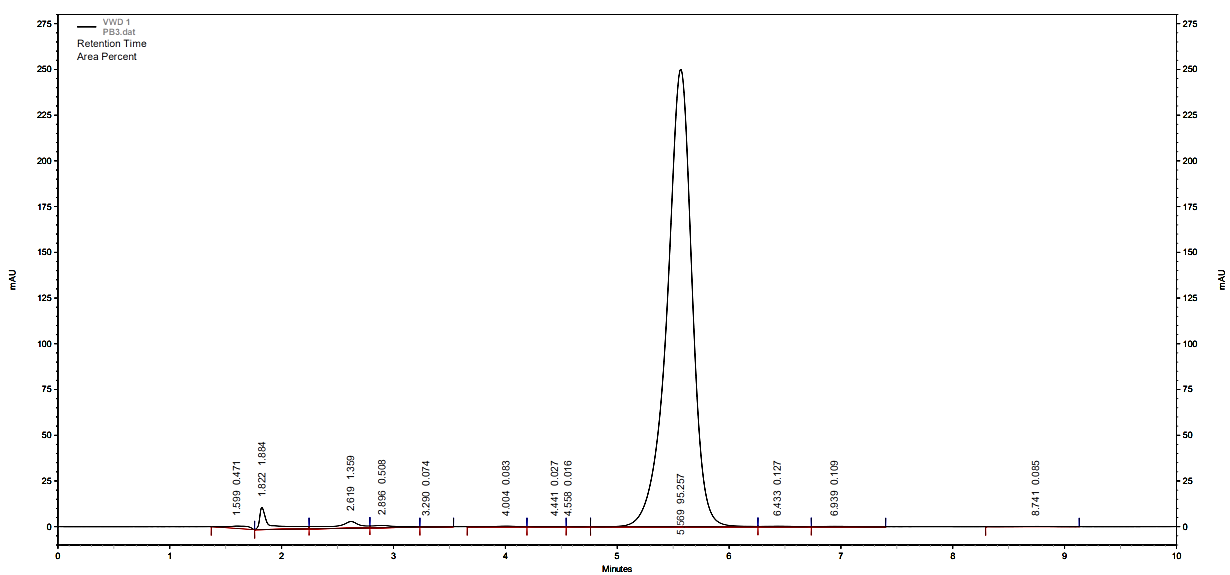


5. Mass


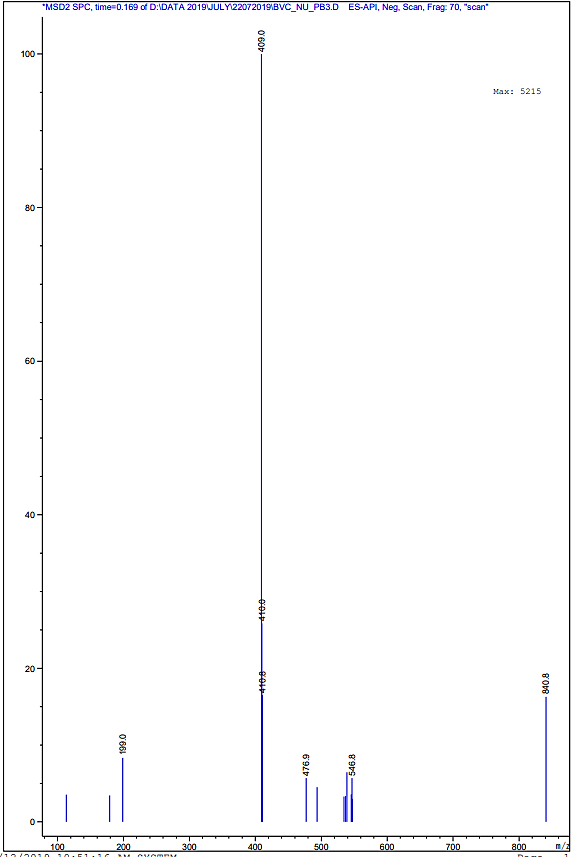


N-(4-chlorobenzo[d]thiazol-2-yl)-2-(2,4-dioxo-5-(pyridin-2-ylmethylene)thiazolidin-3-yl)acetamide (PB4)

1. FTIR


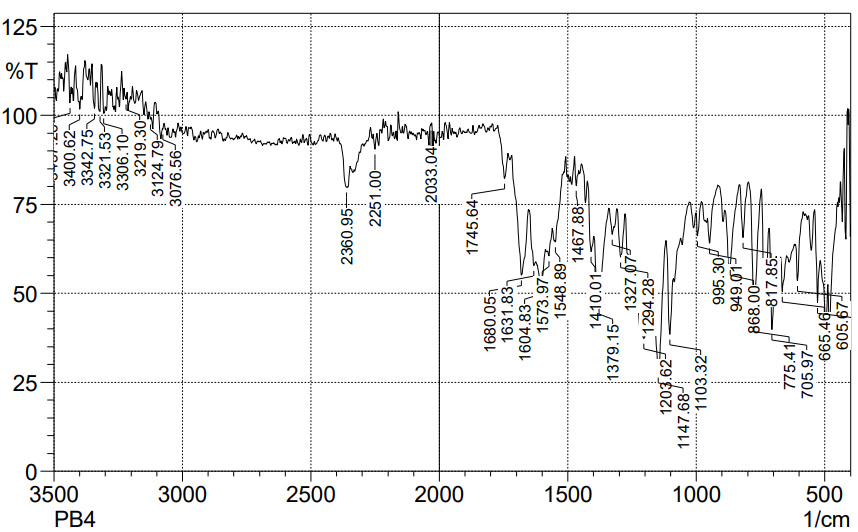


2. 1H-NMR


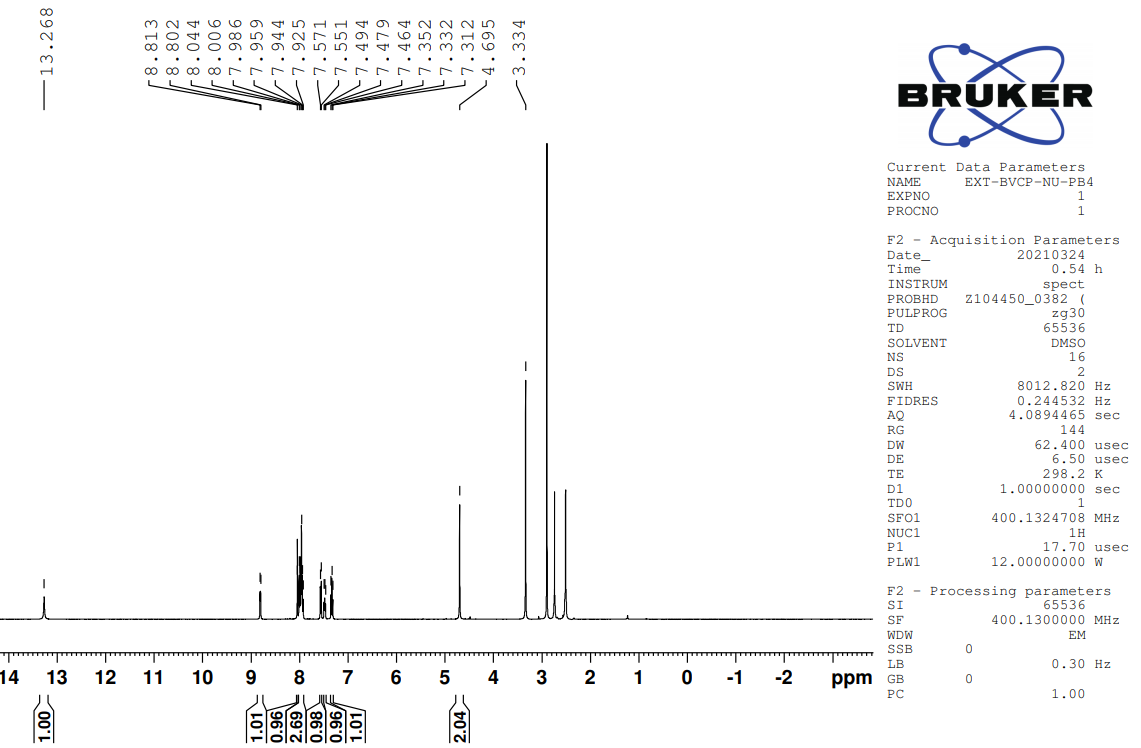


3. 13C-NMR


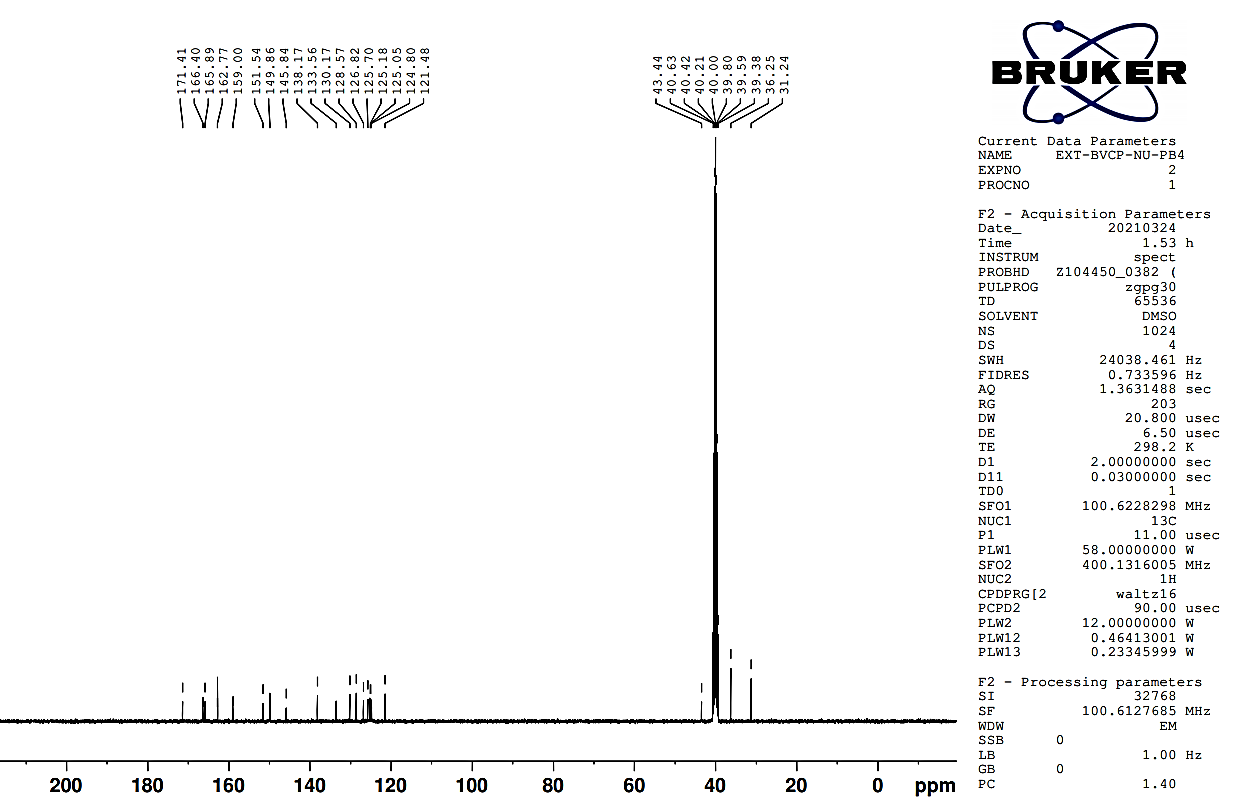


4. HPLC


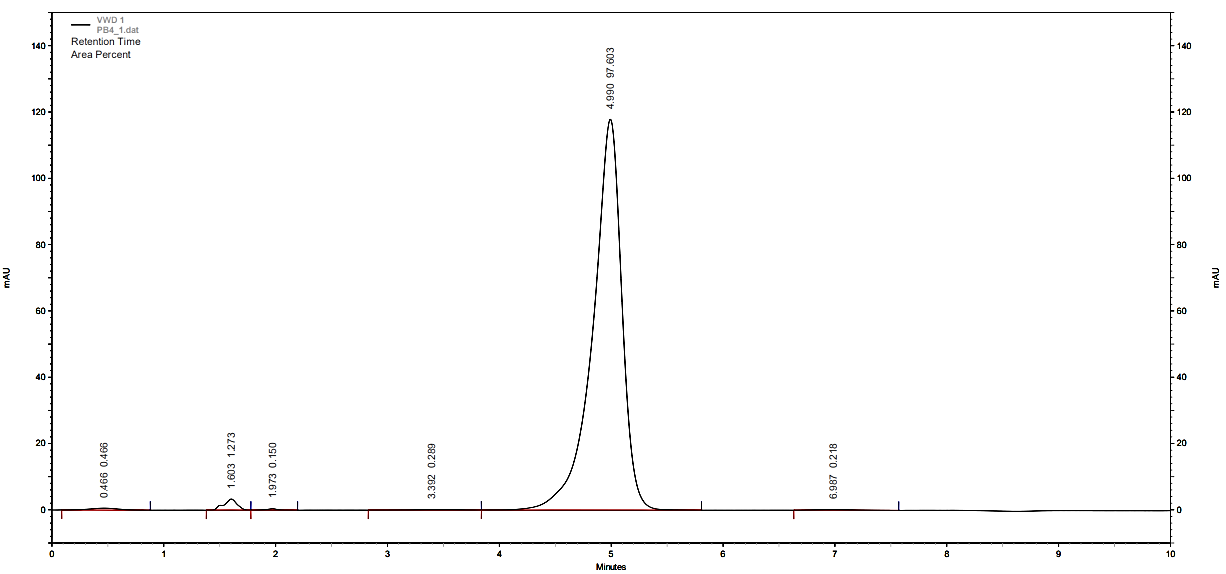


5. Mass


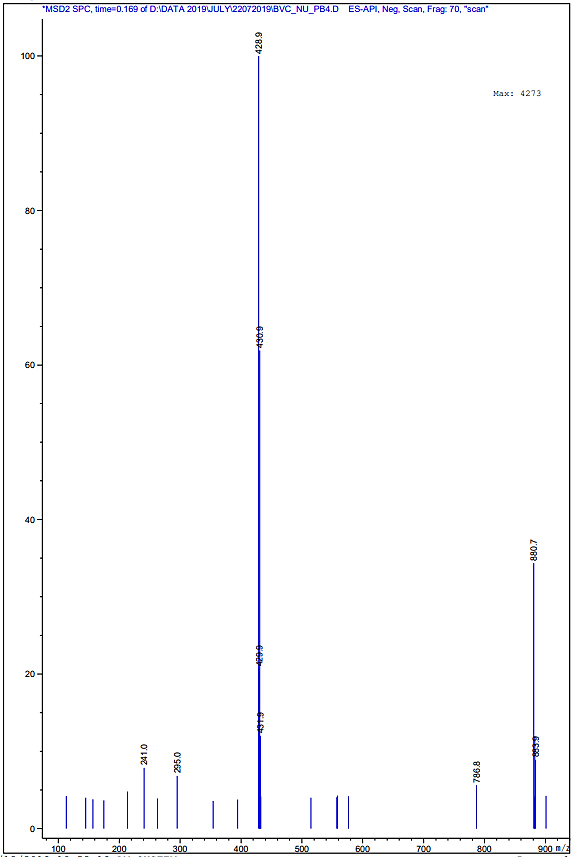


N-(4,6-difluorobenzo[d]thiazol-2-yl)-2-(2,4-dioxo-5-(pyridin-2-ylmethylene)thiazolidin-3-yl)acetamide (PB5)

1. FTIR


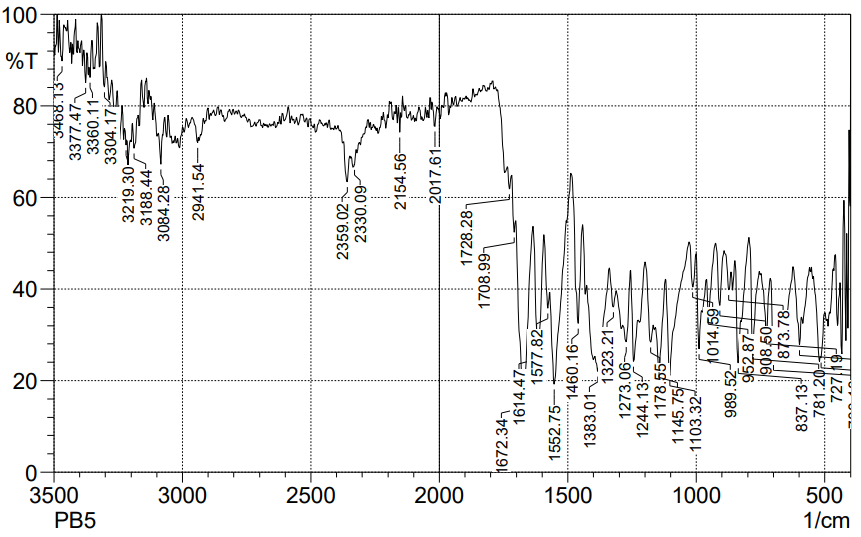


2. 1H-NMR


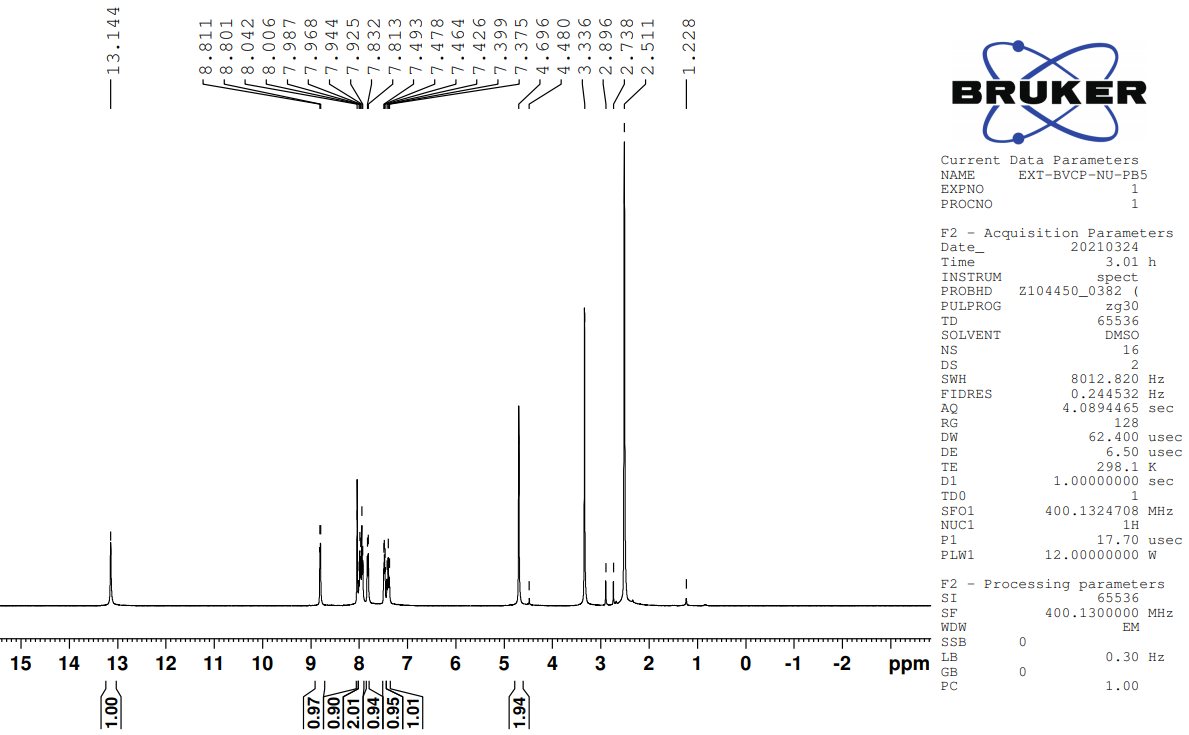


3. 13C-NMR


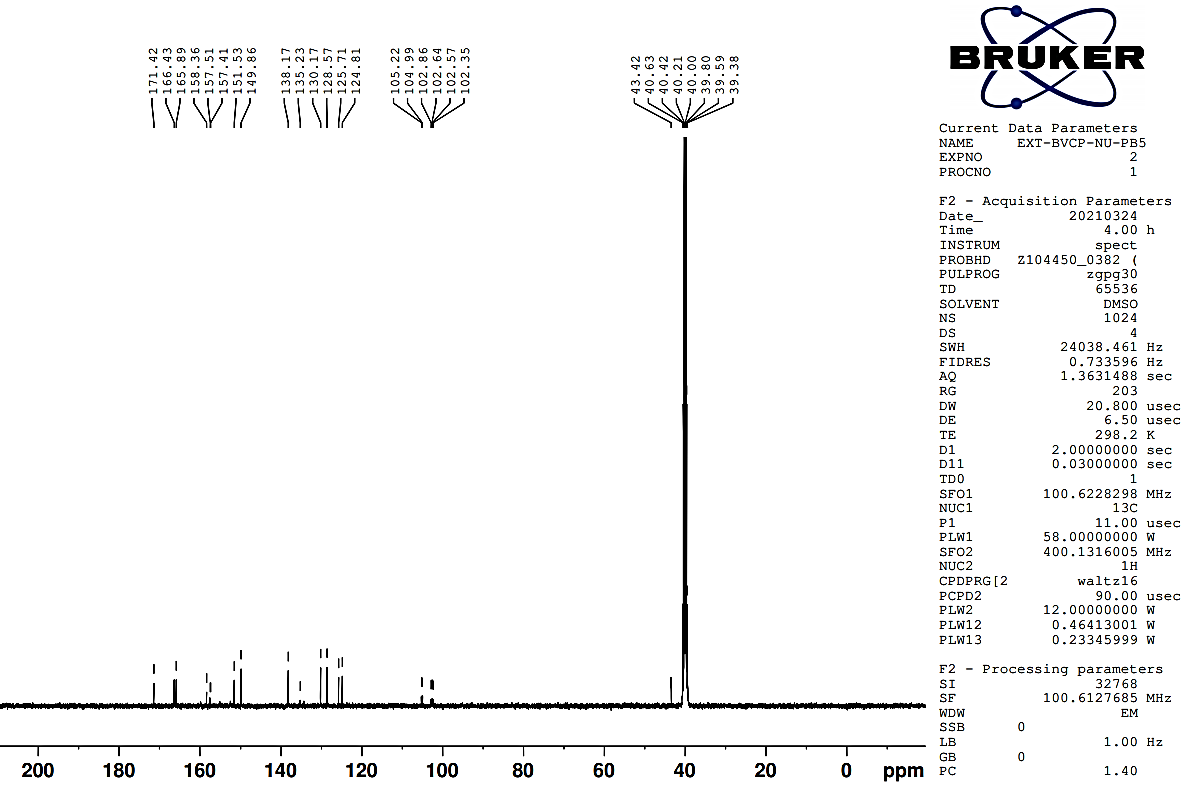


4. HPLC


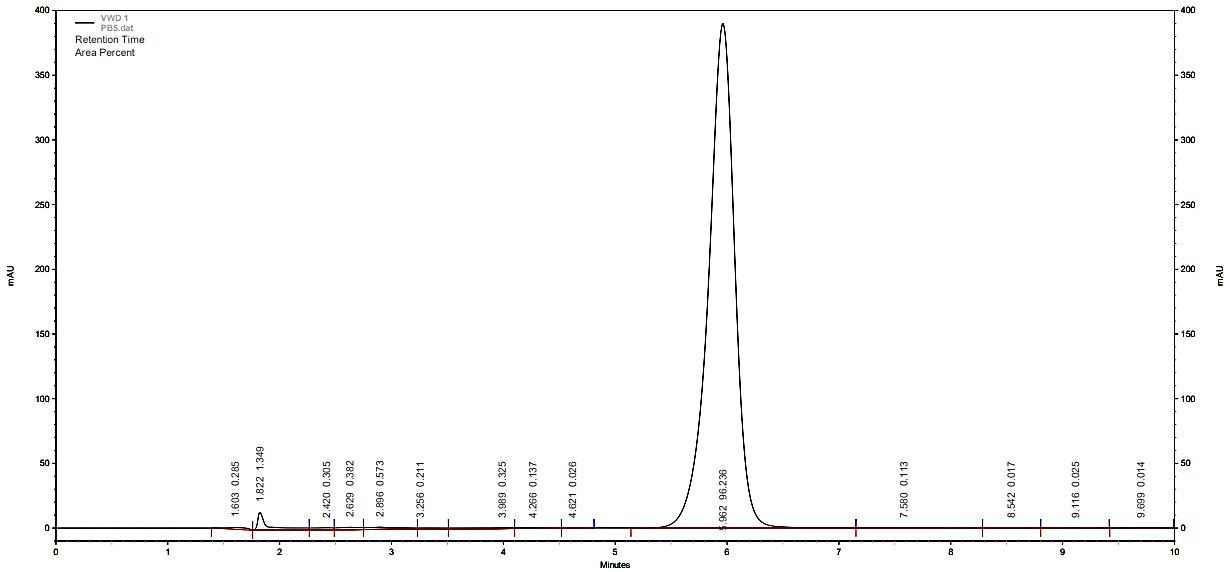


5. Mass


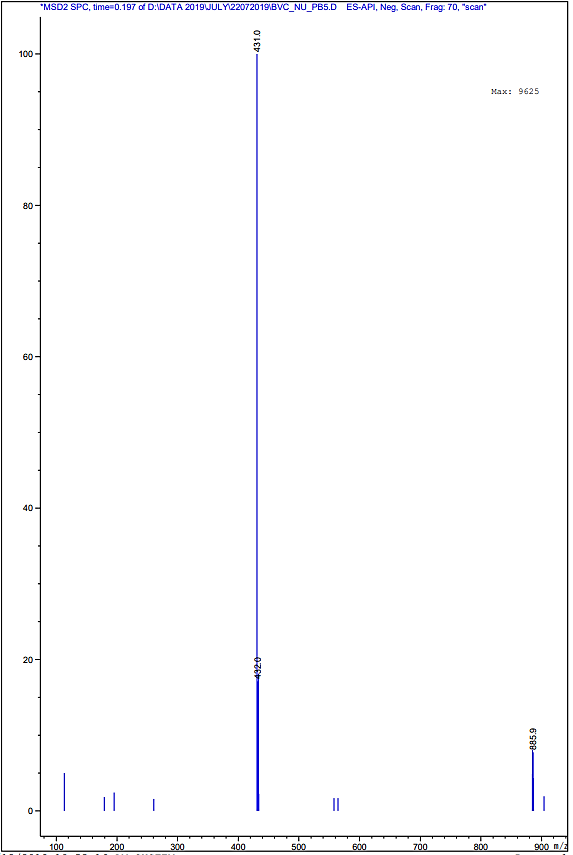


N-(5,6-dimethylbenzo[d]thiazol-2-yl)-2-(2,4-dioxo-5-(pyridin-2-ylmethylene)thiazolidin-3-yl)acetamide (PB6)

1. FTIR


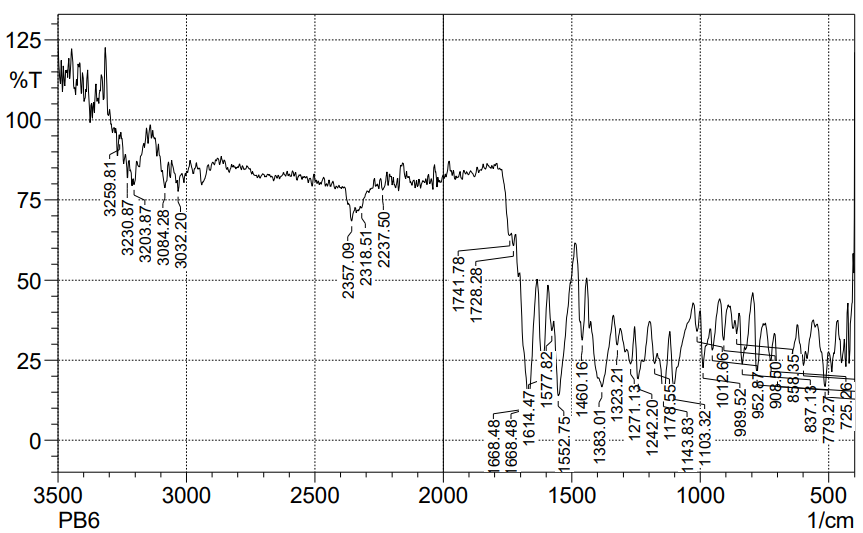


2. 1H-NMR


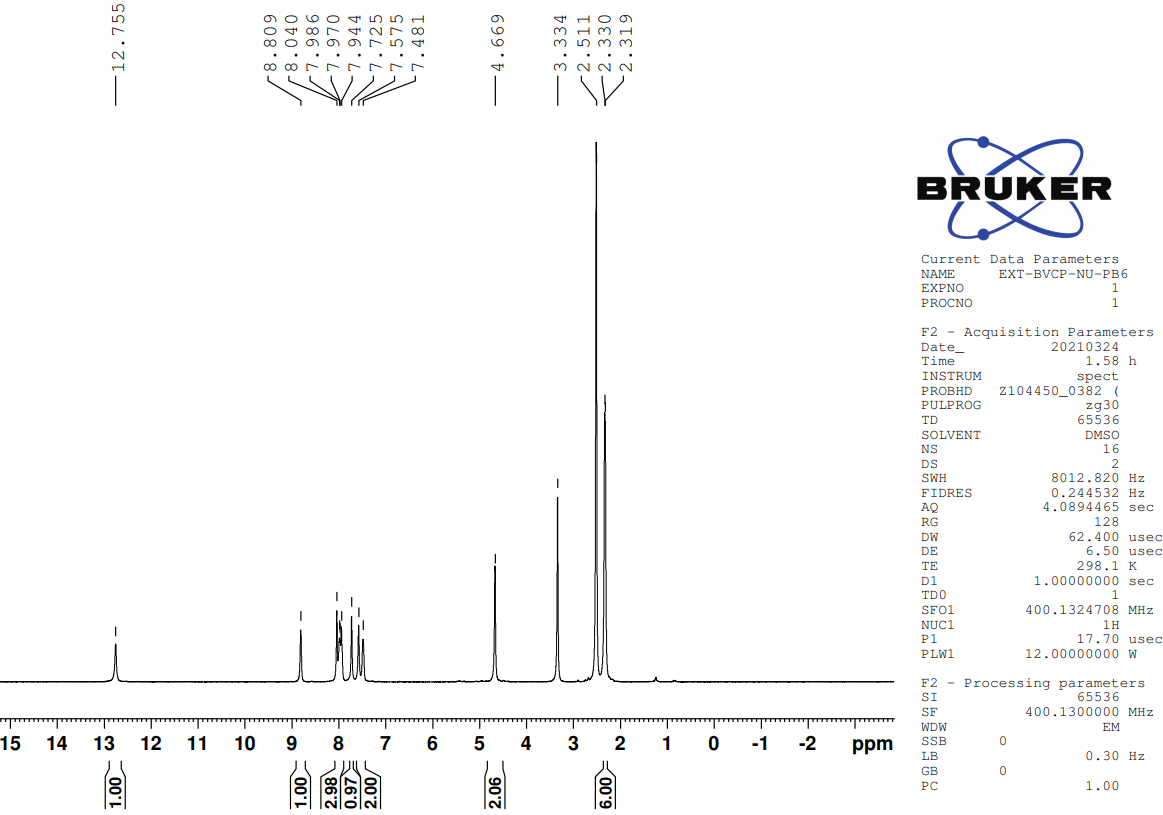


3. 13C-NMR


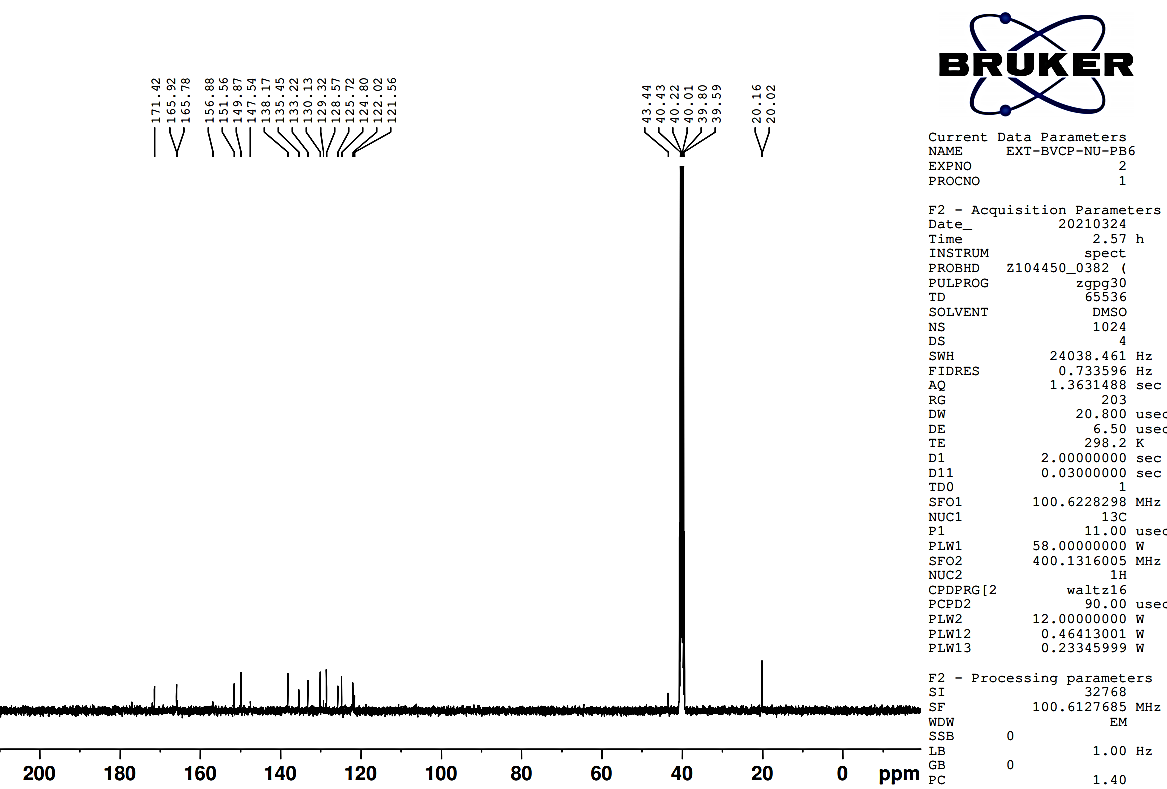


4. HPLC


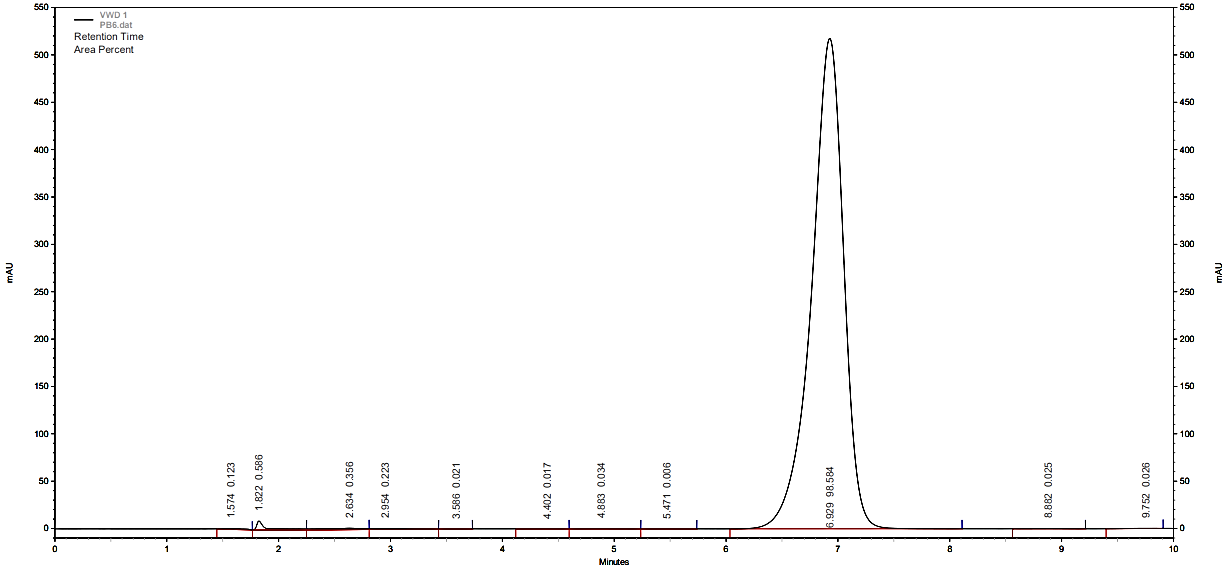


5. Mass


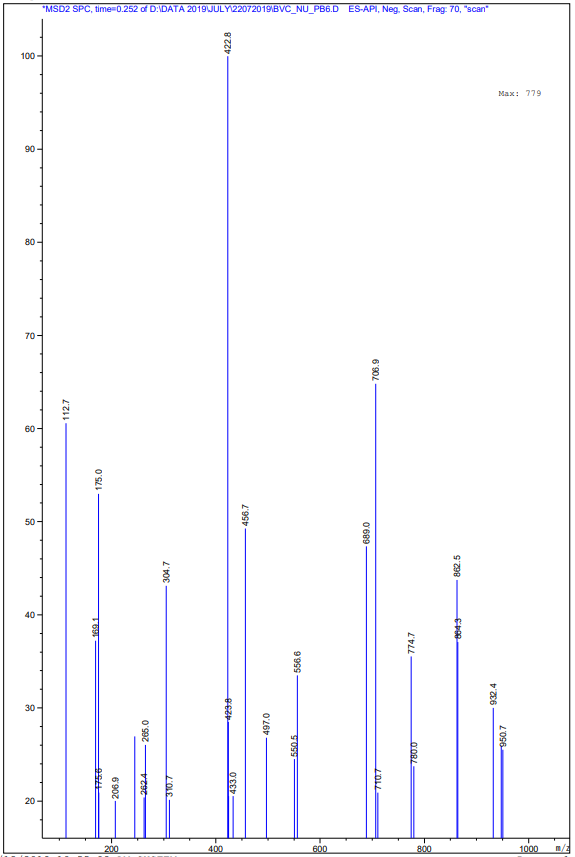


2-(2,4-dioxo-5-(pyridin-2-ylmethylene)thiazolidin-3-yl)-N-(4-methoxybenzo[d]thiazol-2-yl)acetamide (PB7)

1. FTIR


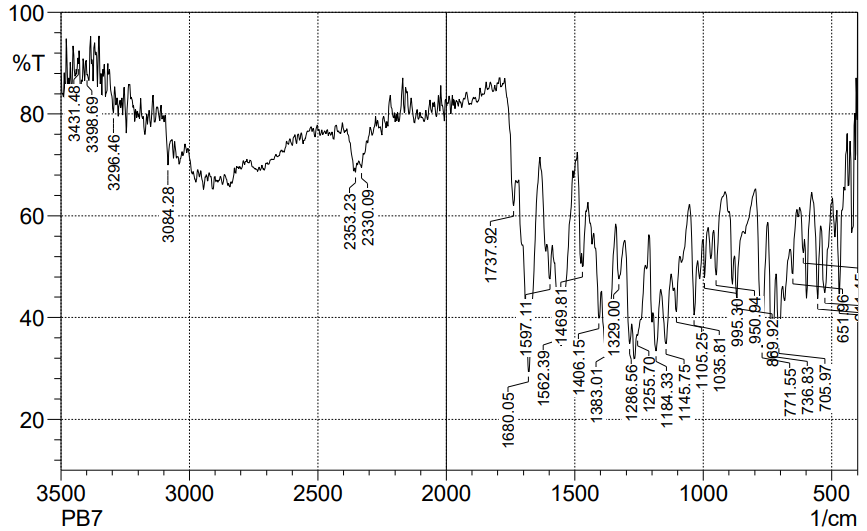


2. 1H-NMR


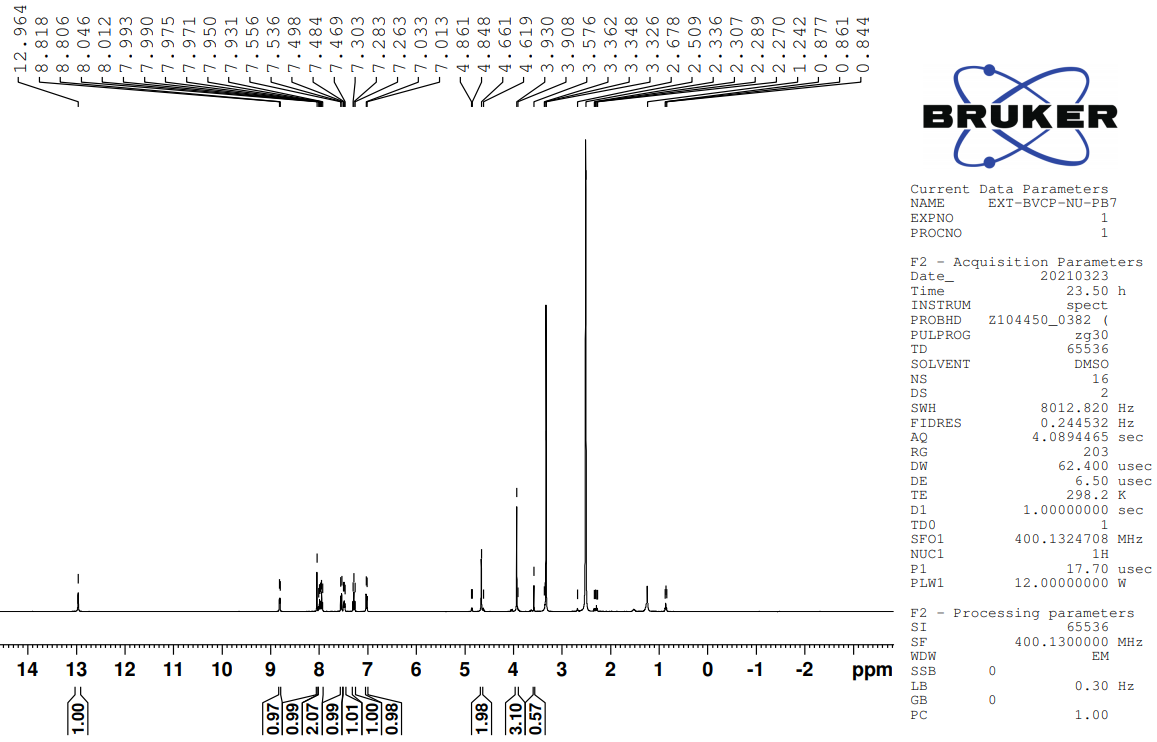


3. 13C-NMR


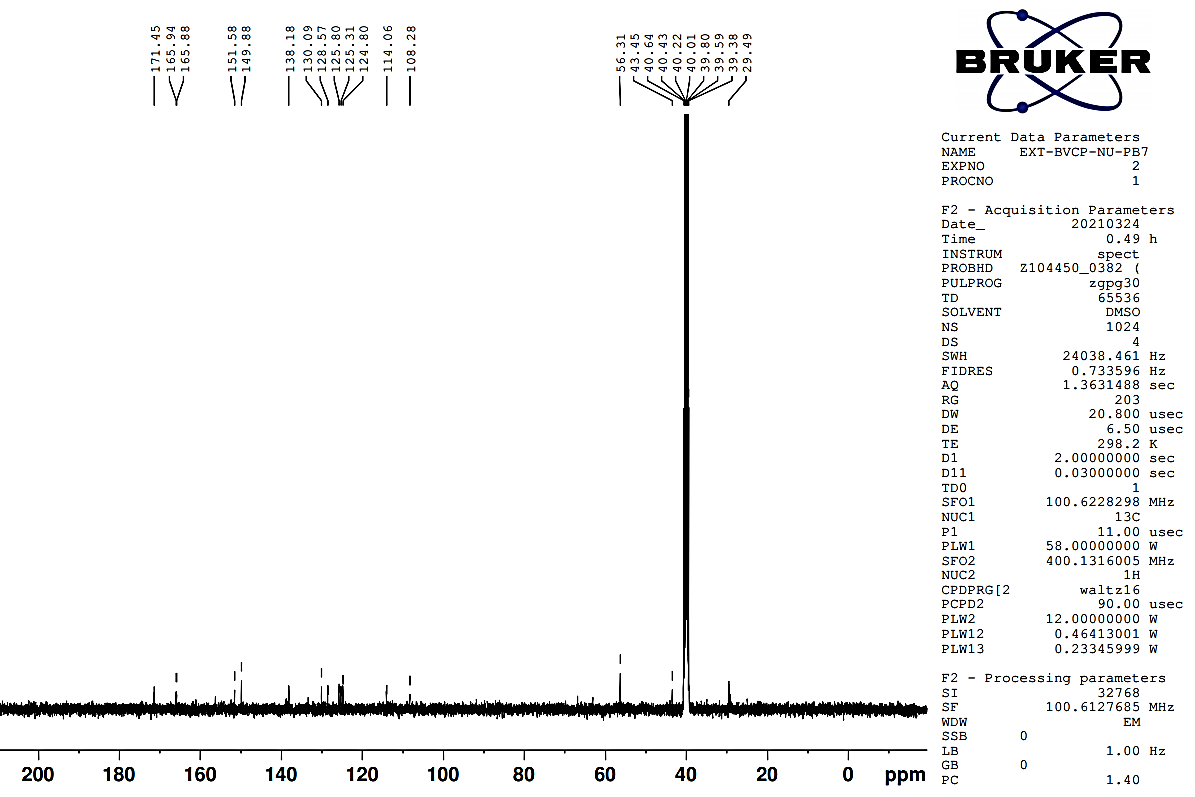


4. HPLC


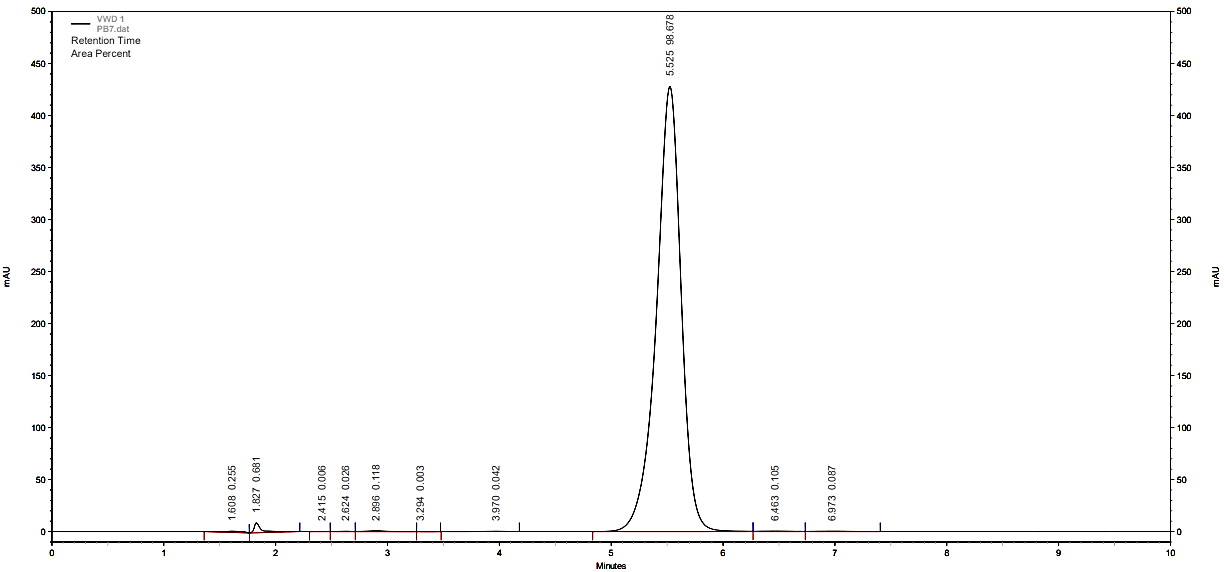


5. Mass


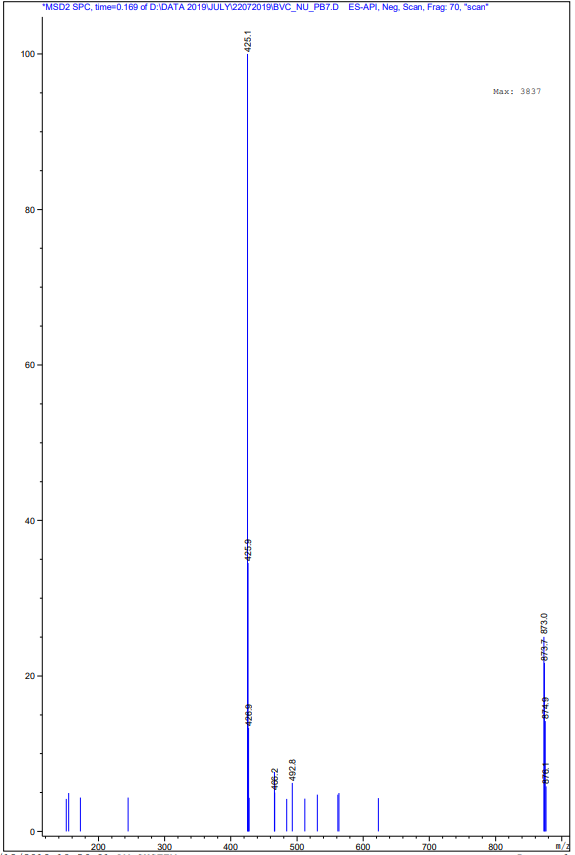


2-(2,4-dioxo-5-(pyridin-2-ylmethylene)thiazolidin-3-yl)-N-(6-ethoxybenzo[d]thiazol-2-yl)acetamide (PB8)

1. FTIR


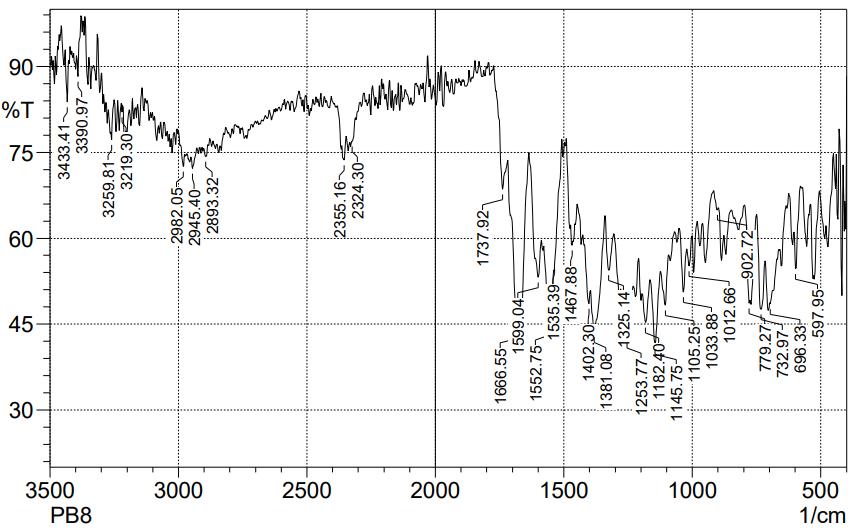


2. 1H-NMR


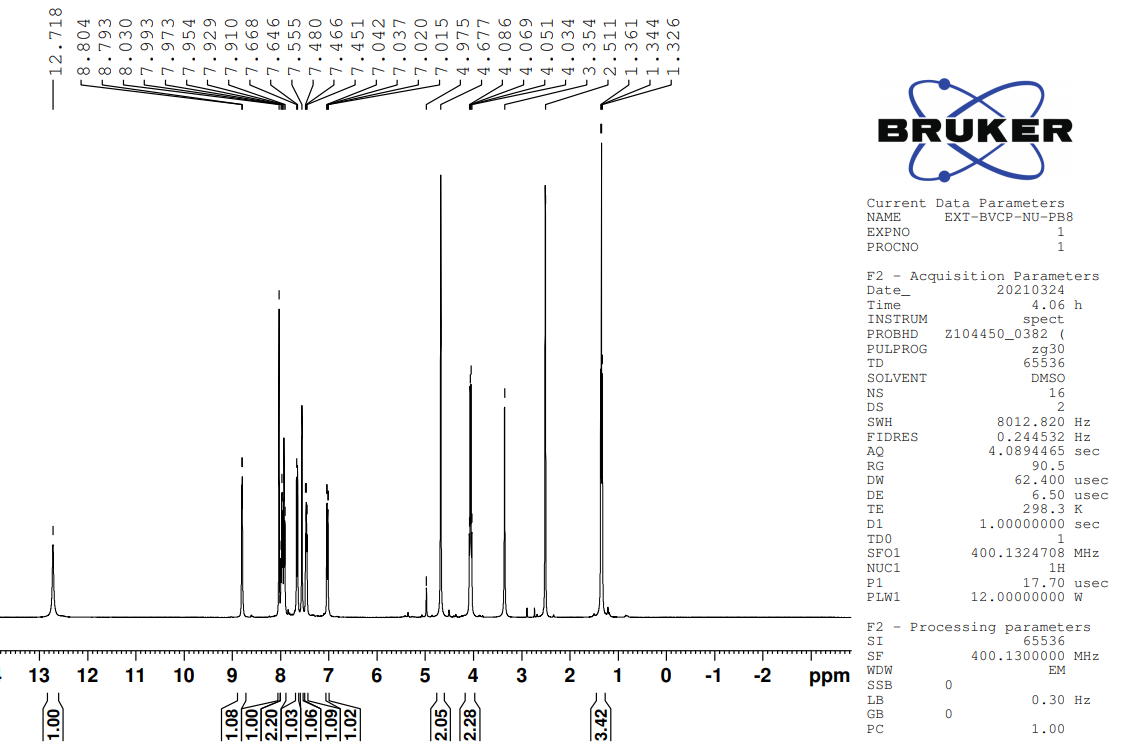


3. 13C-NMR


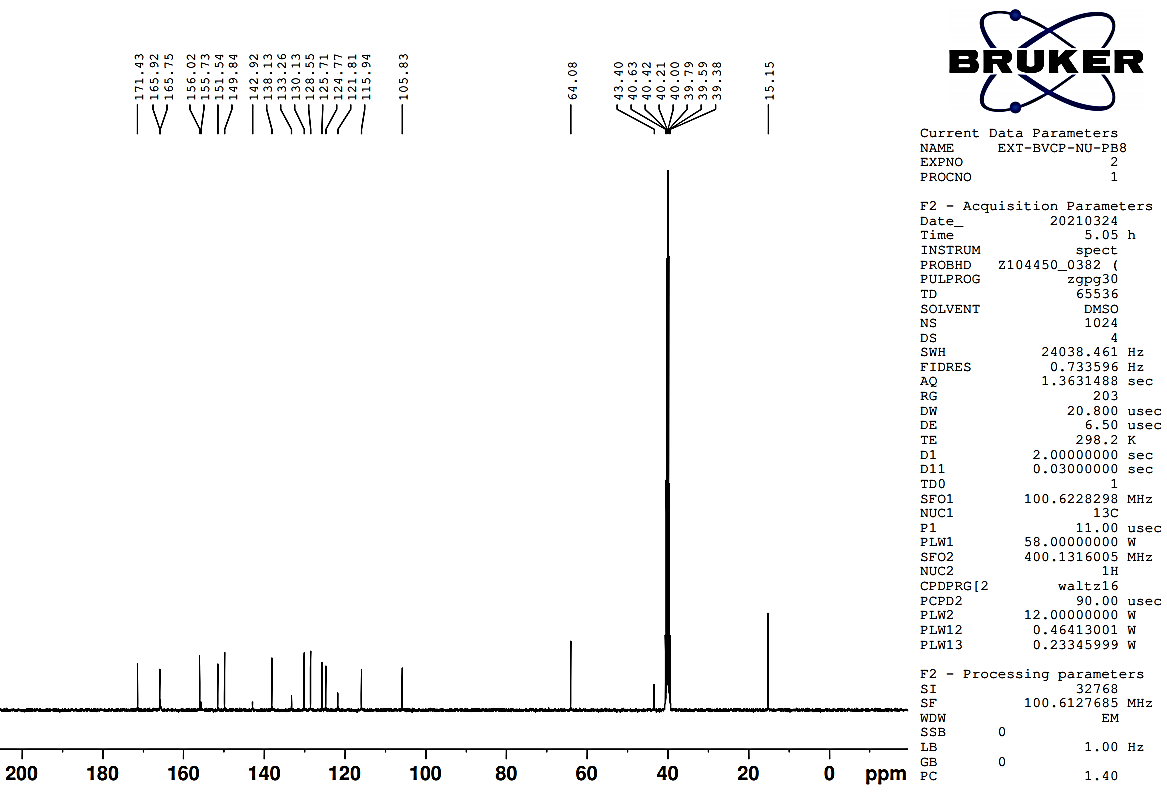


4. HPLC


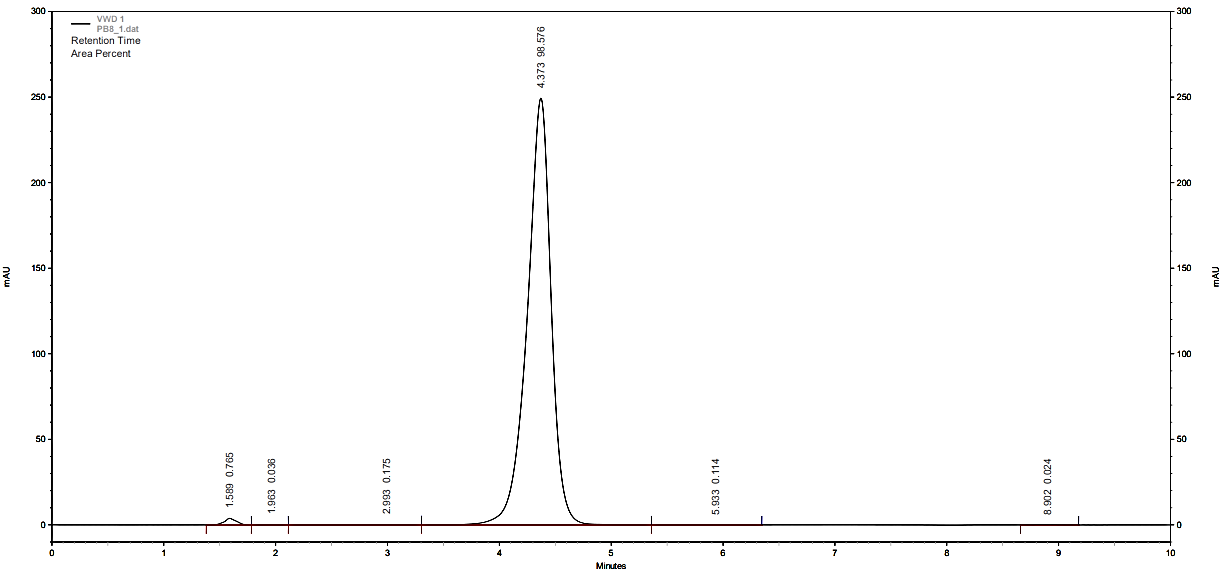


5. Mass


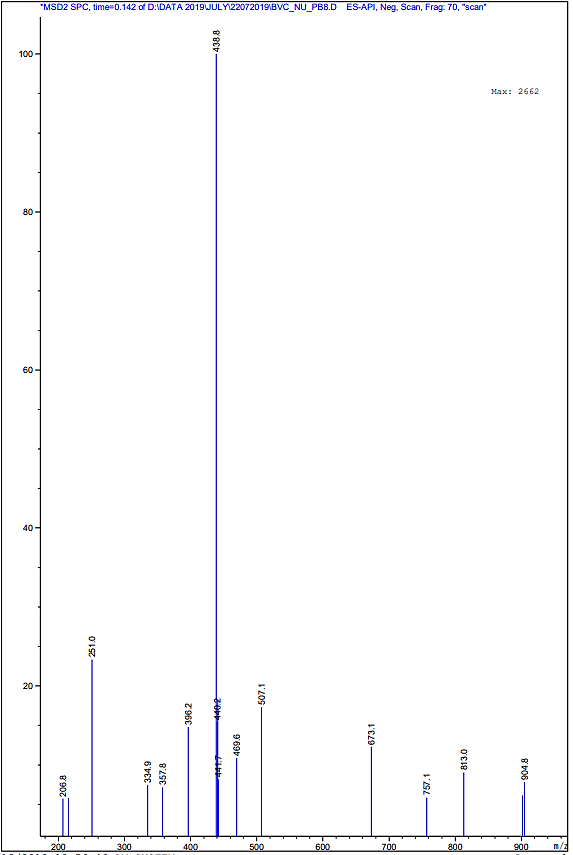


2-(2,4-dioxo-5-(pyridin-2-ylmethylene)thiazolidin-3-yl)-N-(6-fluorobenzo[d]thiazol-2-yl)acetamide (PB9)

1. FTIR


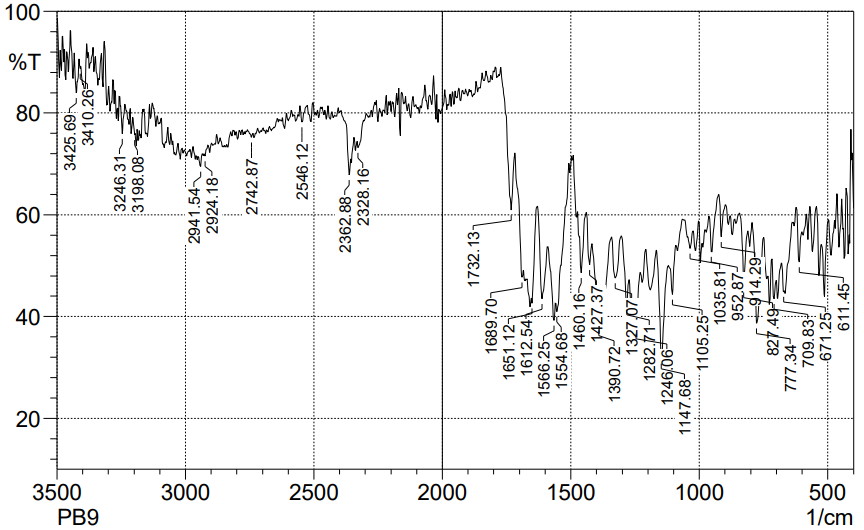


2. 1H-NMR


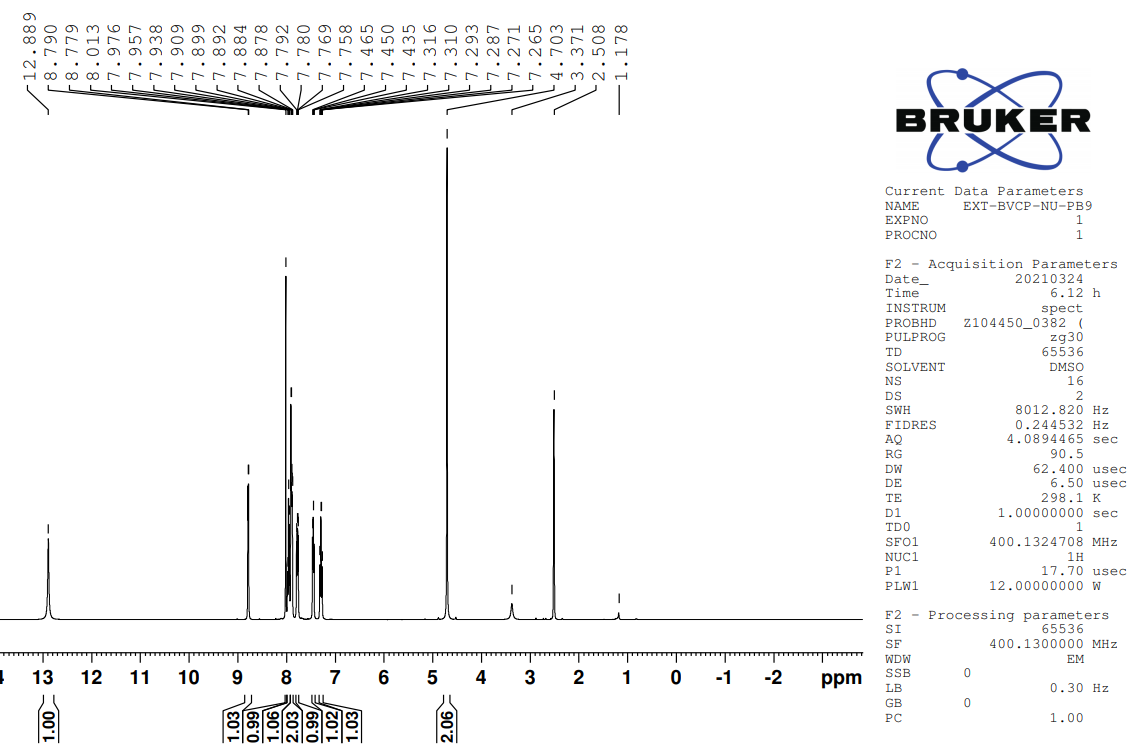


3. 13C-NMR


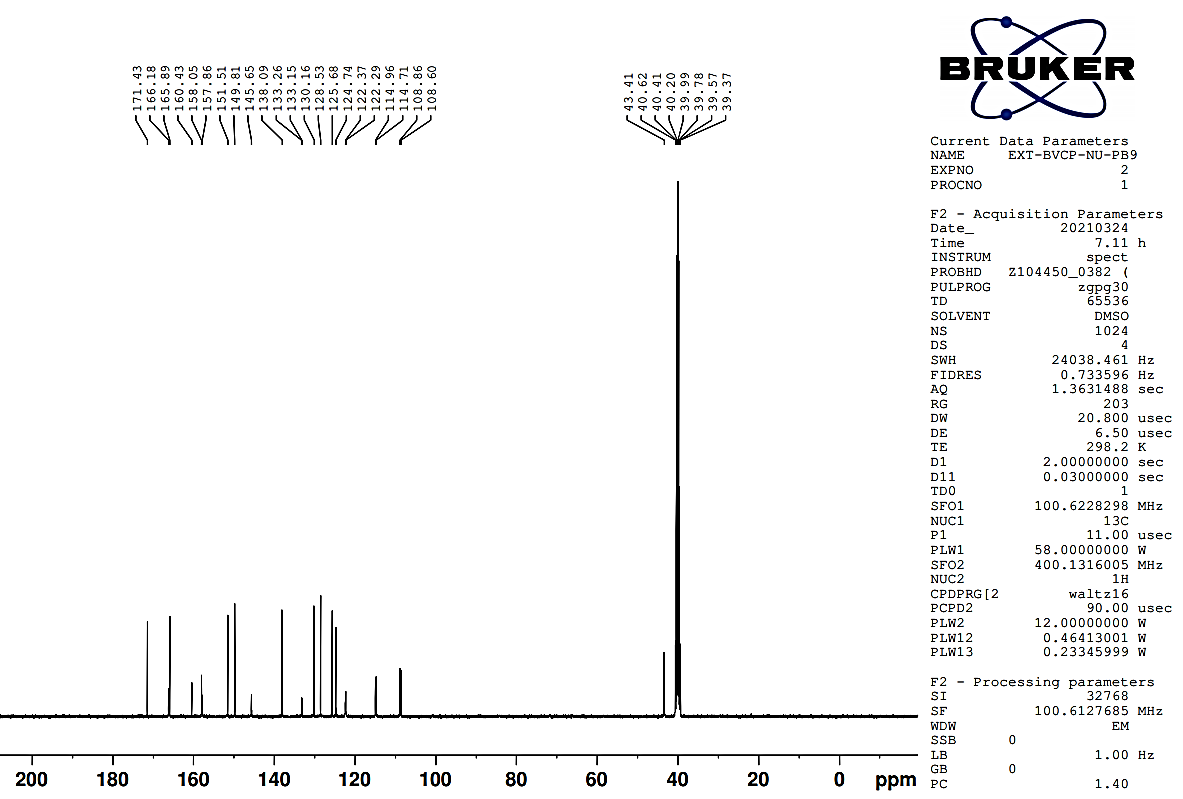


4. HPLC


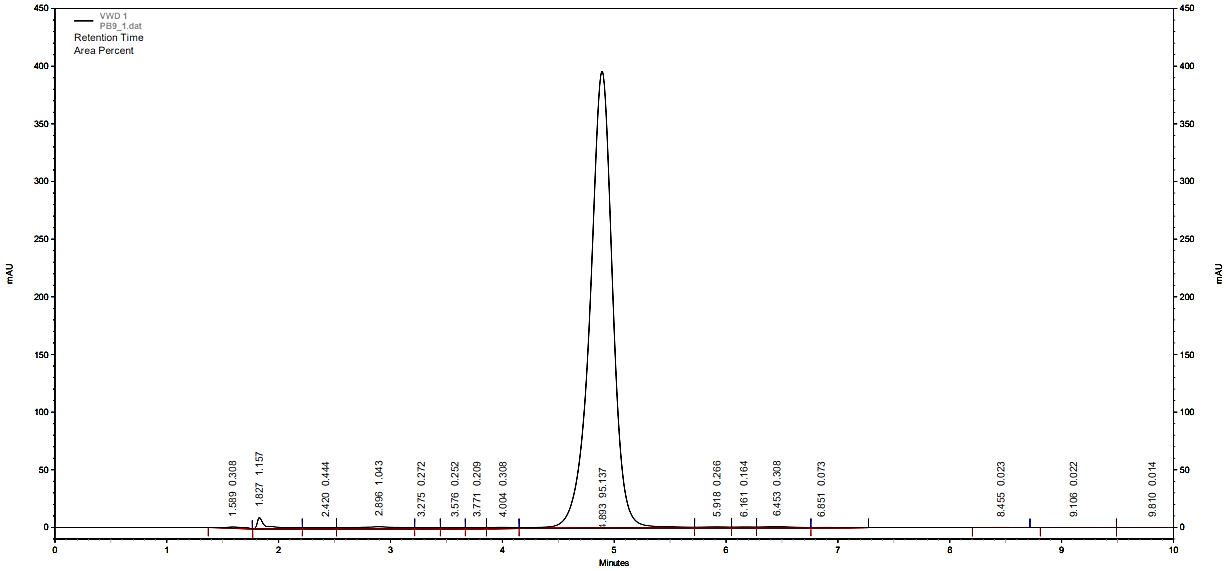


5. Mass


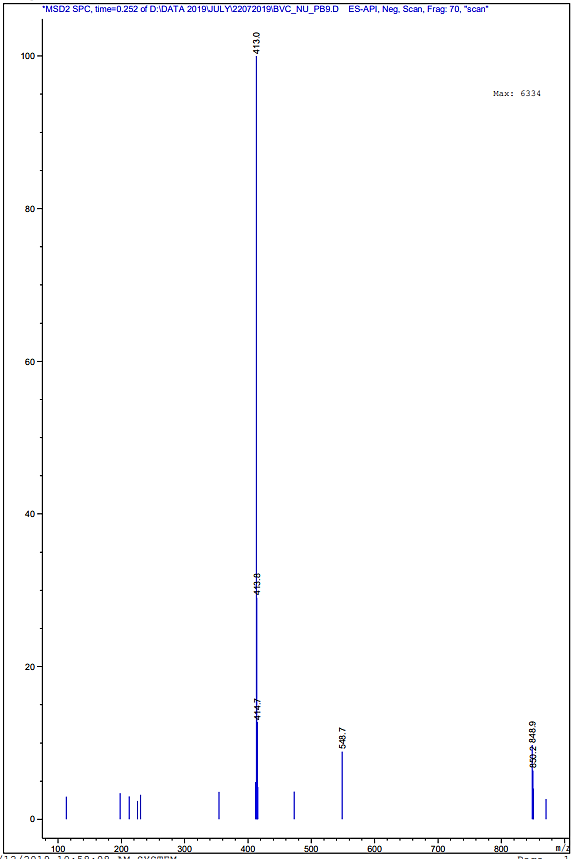


**N-(4-chlorobenzo[d]thiazol-2-yl)-2-(5-(4-chlorobenzylidene)-2,4-dioxothiazolidin-3-yl)acetamide (PB10)**

**1. FTIR -**

**
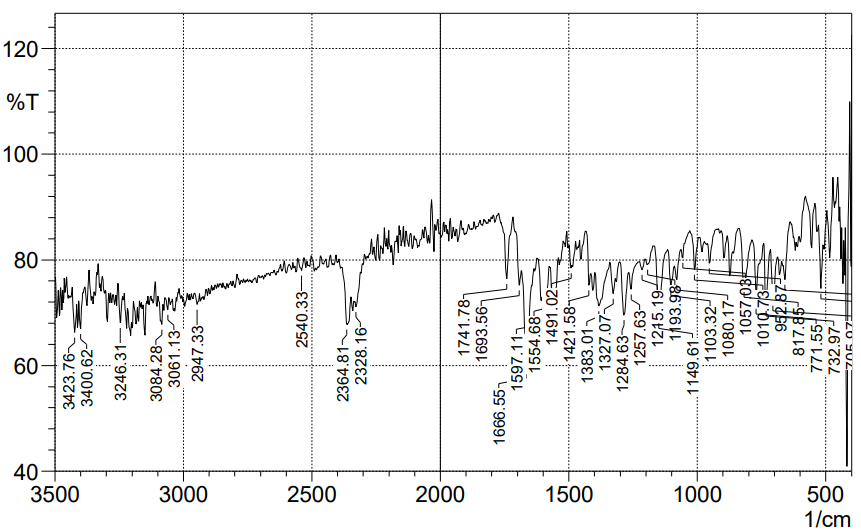
**

**2. IH-NMR**

**
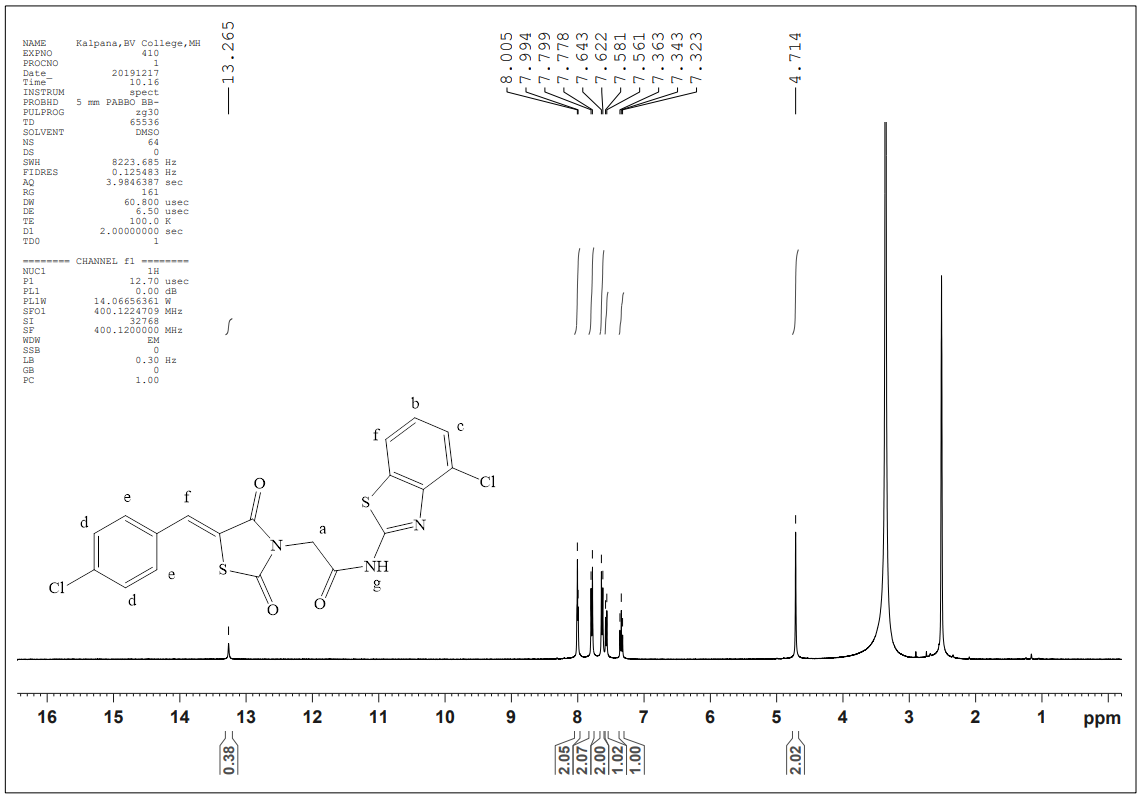
**

**3. 13C-NMR**


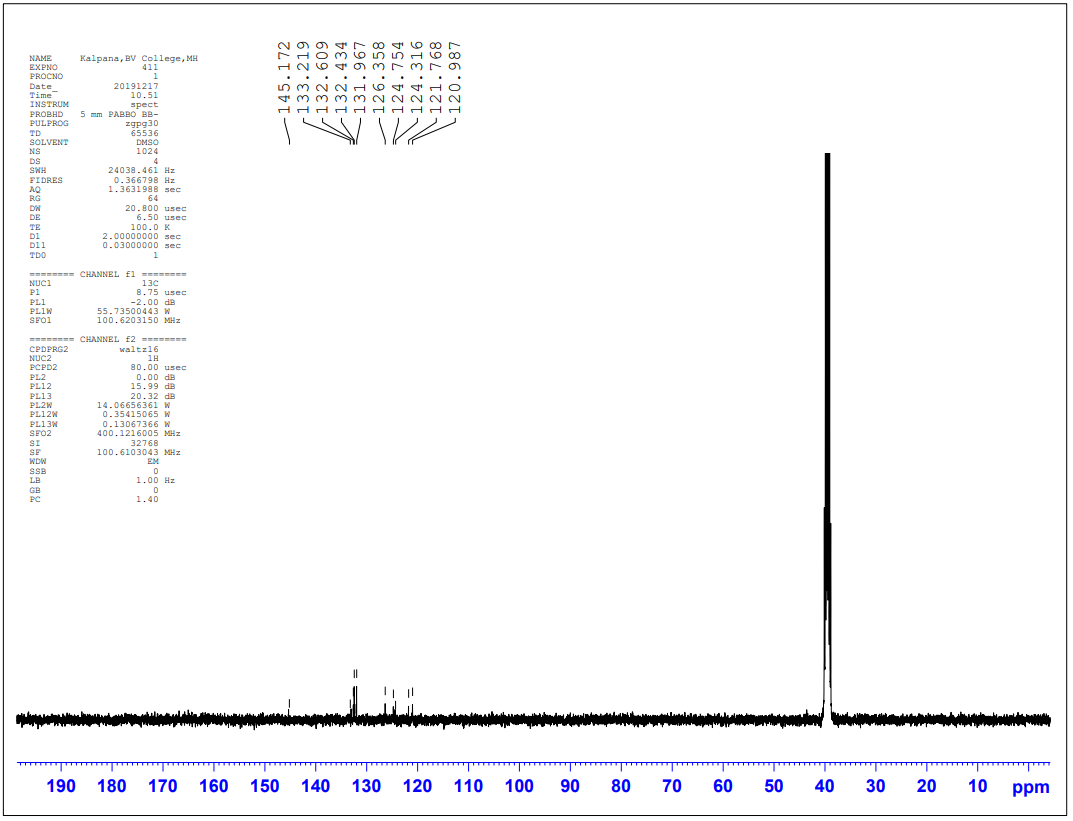


**4. HPLC Analysis**

**
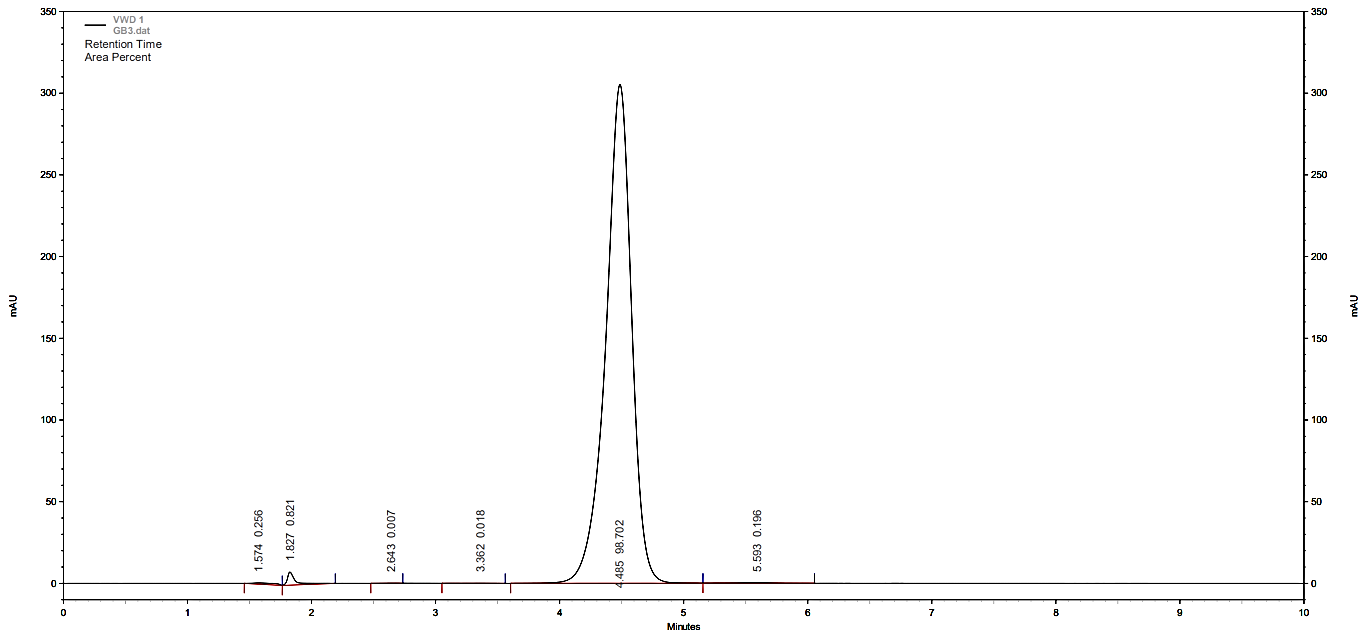
**

**5. Mass Spectrometry**

**
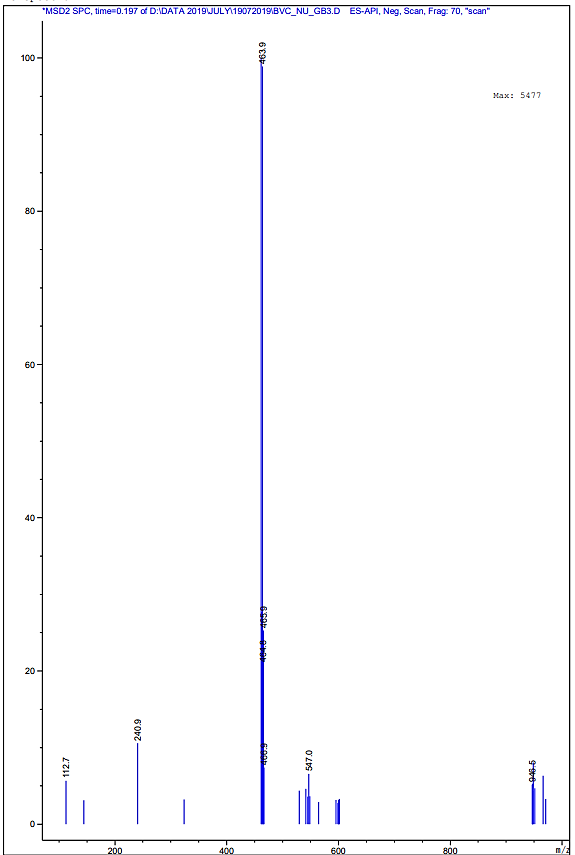
**

**6. UV**

**
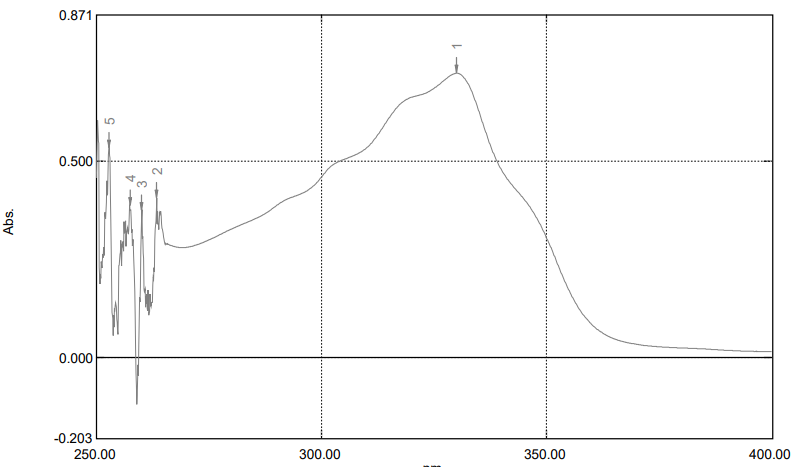
**

**N-(4-chlorobenzo[d]thiazol-2-yl)-2-(5-(2,4-difluorobenzylidene)-2,4-dioxothiazolidin-3-yl)acetamide (PB11)**

**1. FTIR -**

**
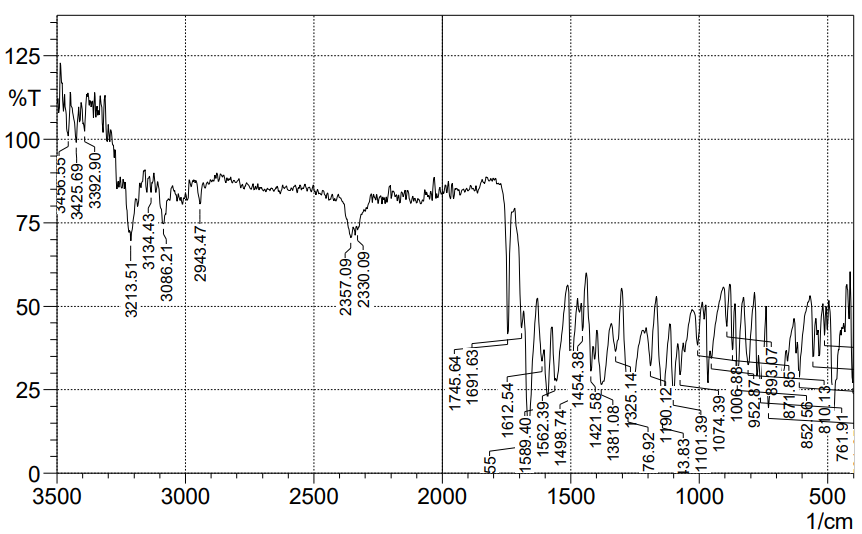
**

**2.** **IH-NMR**

**
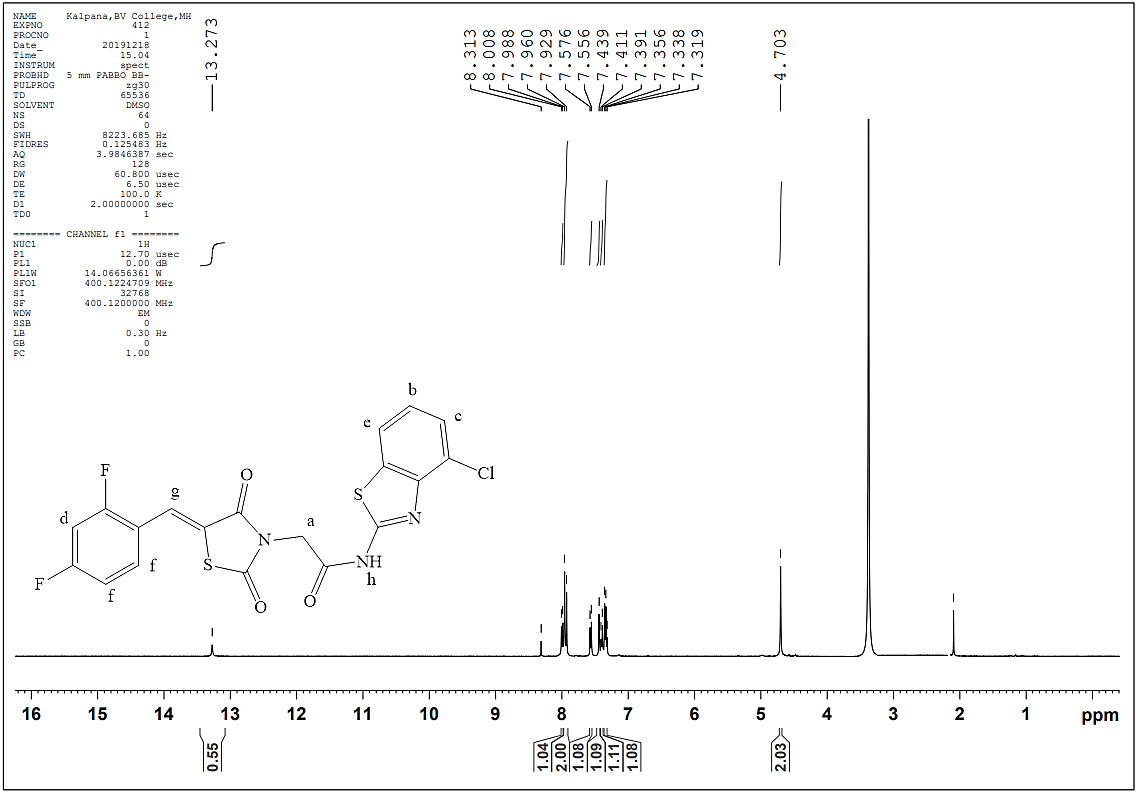
**

**3. 13C-NMR**


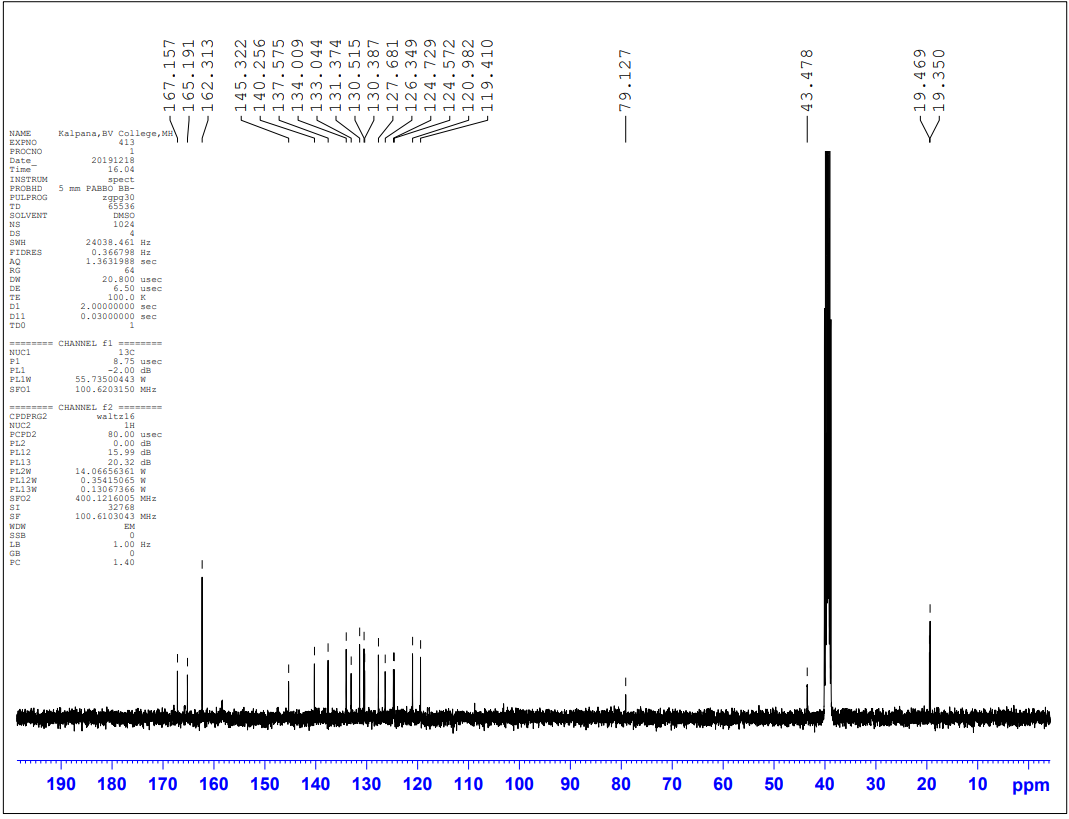


**4. HPLC**

**
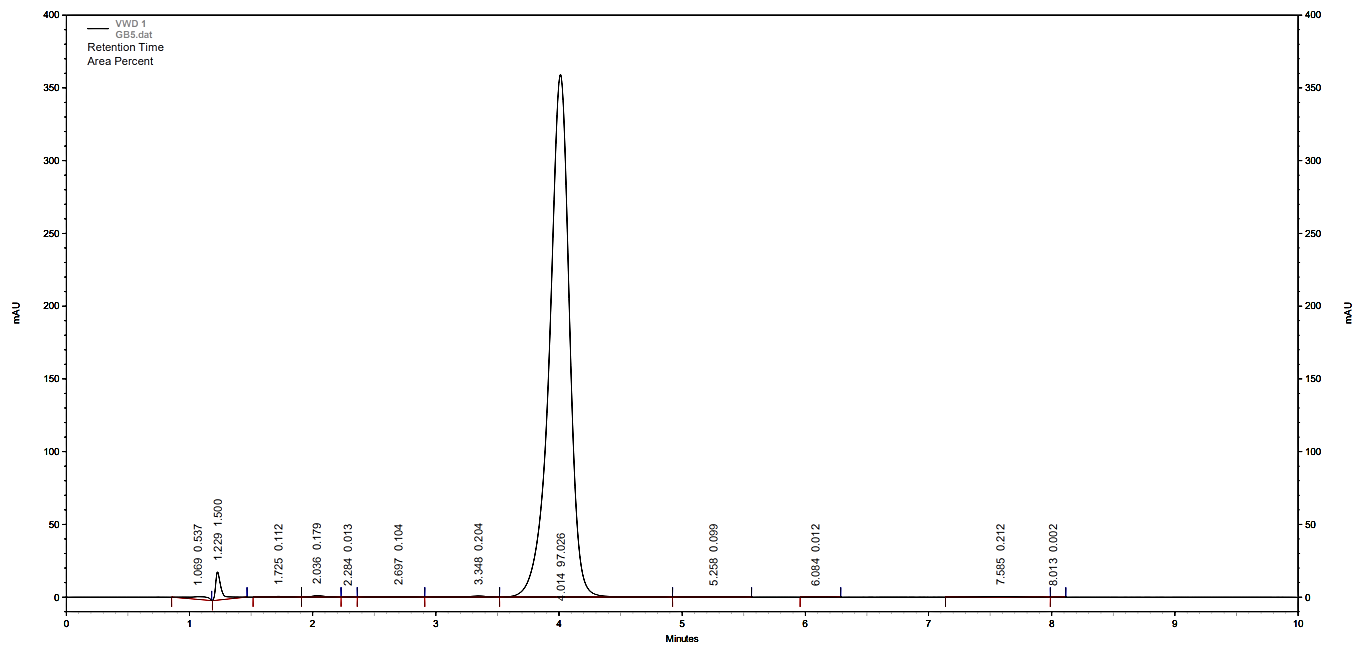
**

**5. Mass Spectrometry**

**
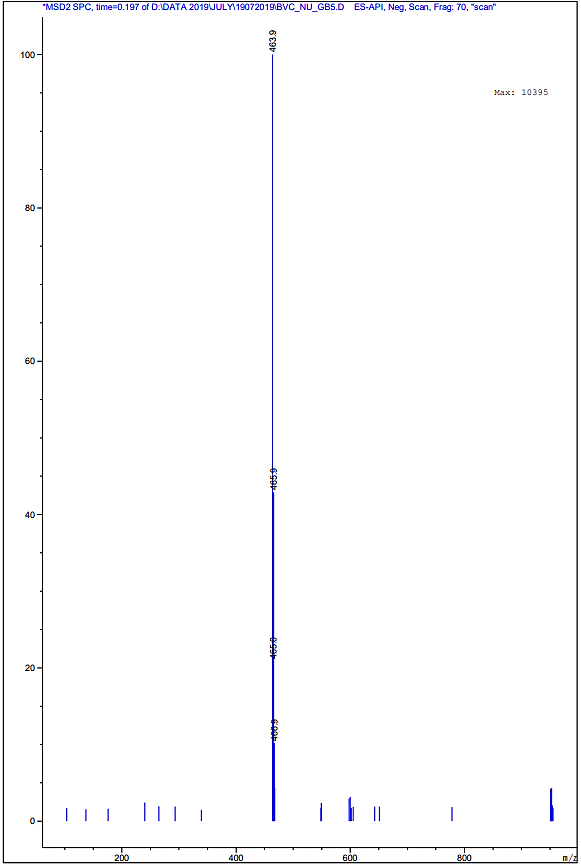
**

**6. UV**

**
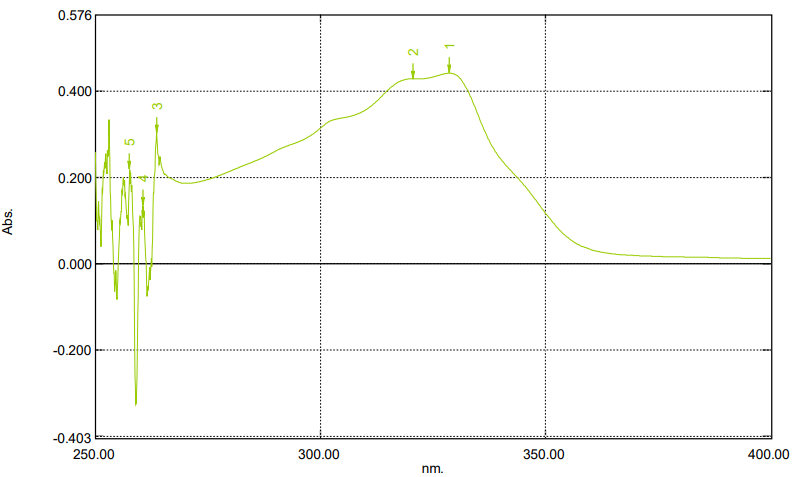
**

**2-(5-(4-bromobenzylidene)-2,4-dioxothiazolidin-3-yl)-N-(4,6-difluorobenzo[d]thiazol-2-yl)acetamide (PB12)**

**1. FTIR –**

**
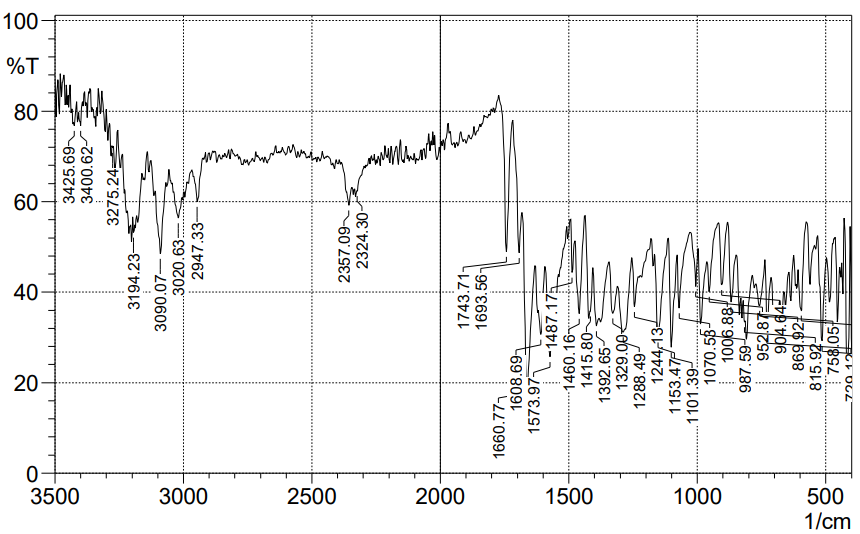
**

**2. IH-NMR**


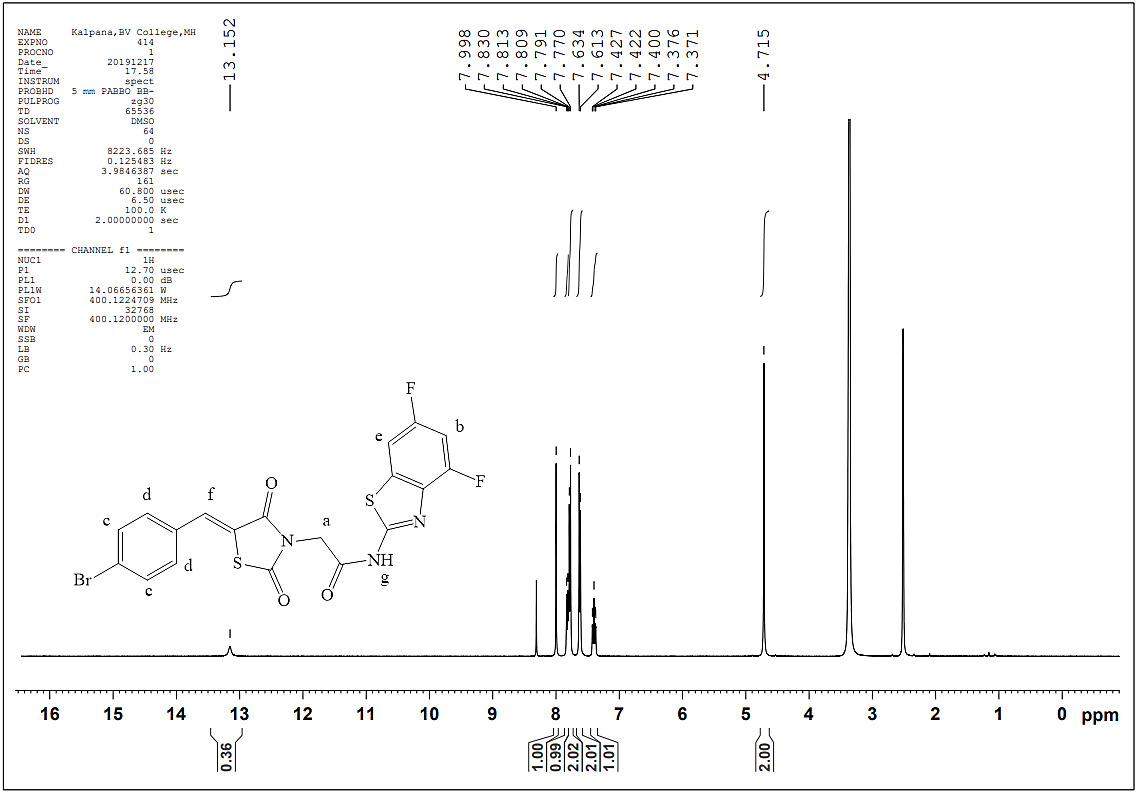


**3. 13C-NMR**

**
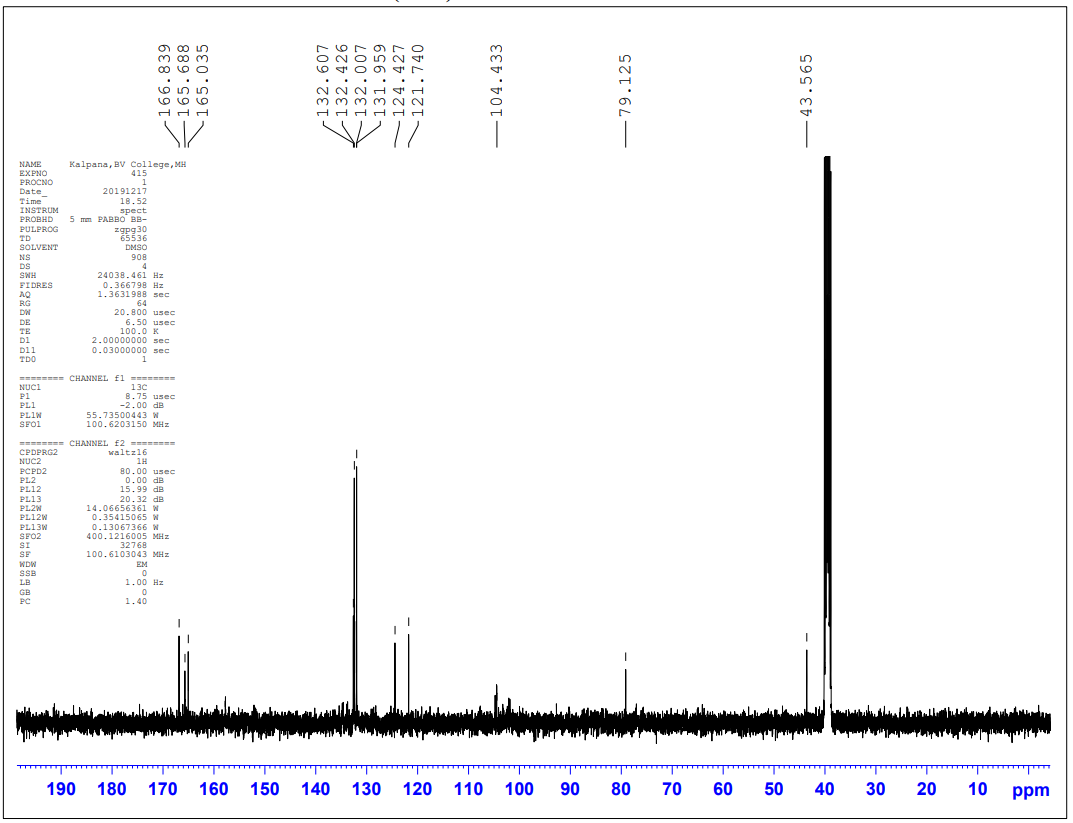
**

**4. HPLC Analysis**


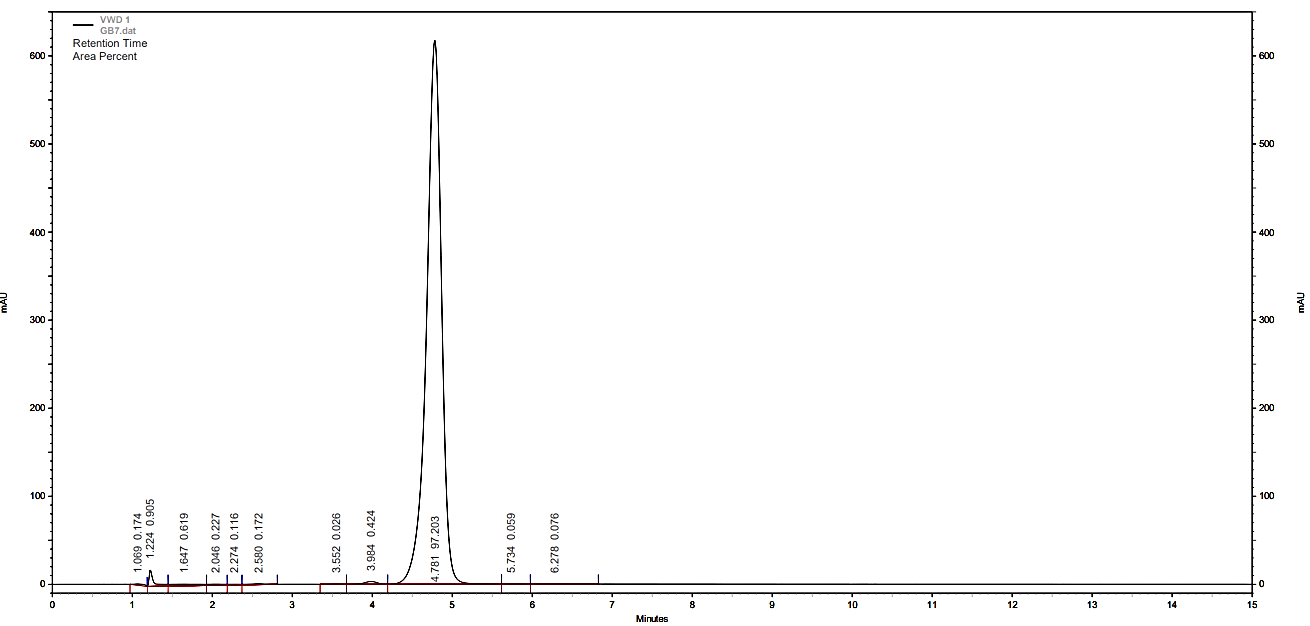


**5. Mass Spectrometry**


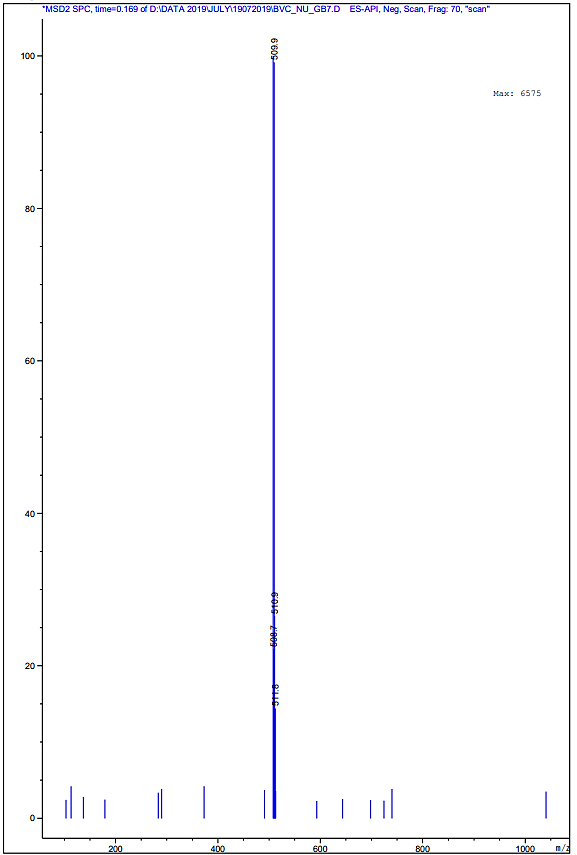


**6. UV**

**
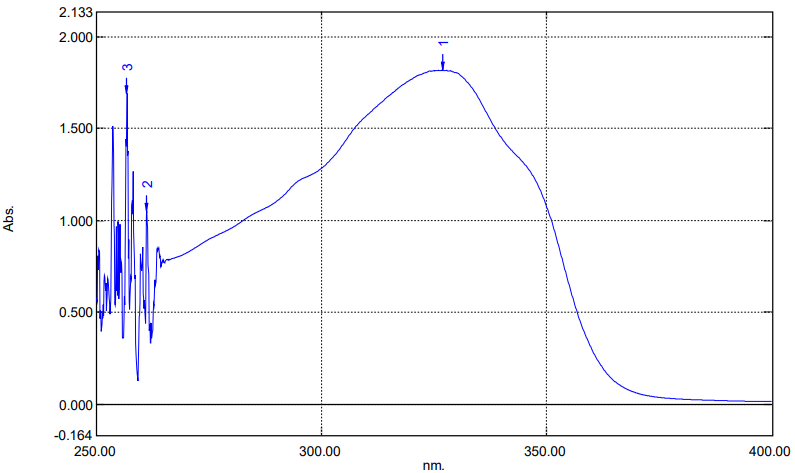
**

**2-(5-benzylidene-2,4-dioxothiazolidin-3-yl)-N-(4-methylbenzo[d]thiazol-2-yl)acetamide (PB13)**

**1. FTIR –**

**
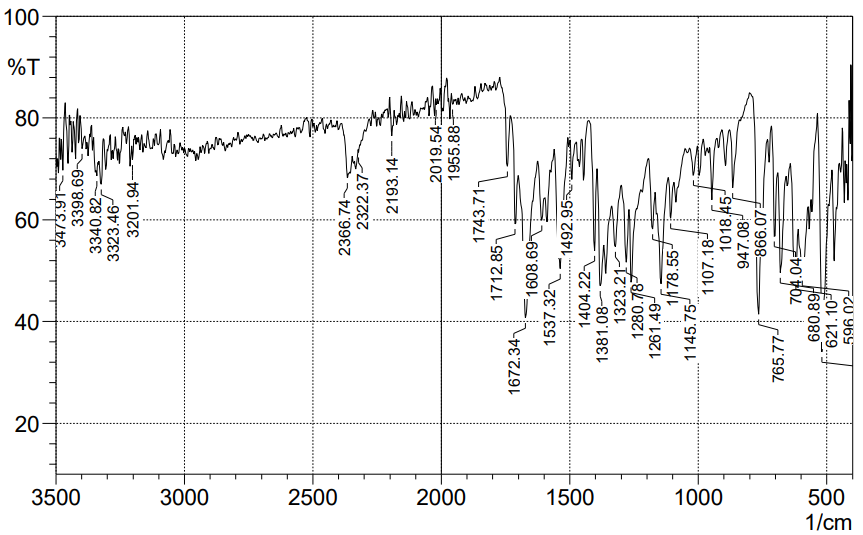
**

**2. IH-NMR**


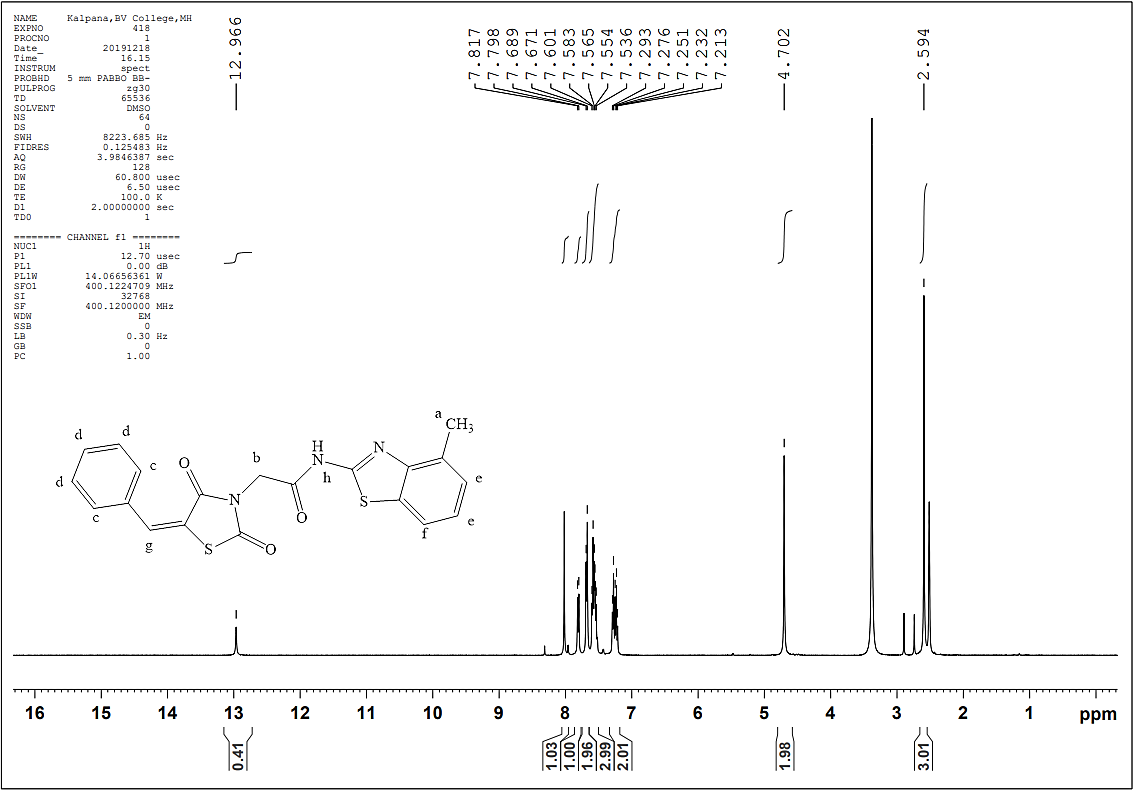


**3. 13C-NMR**

**
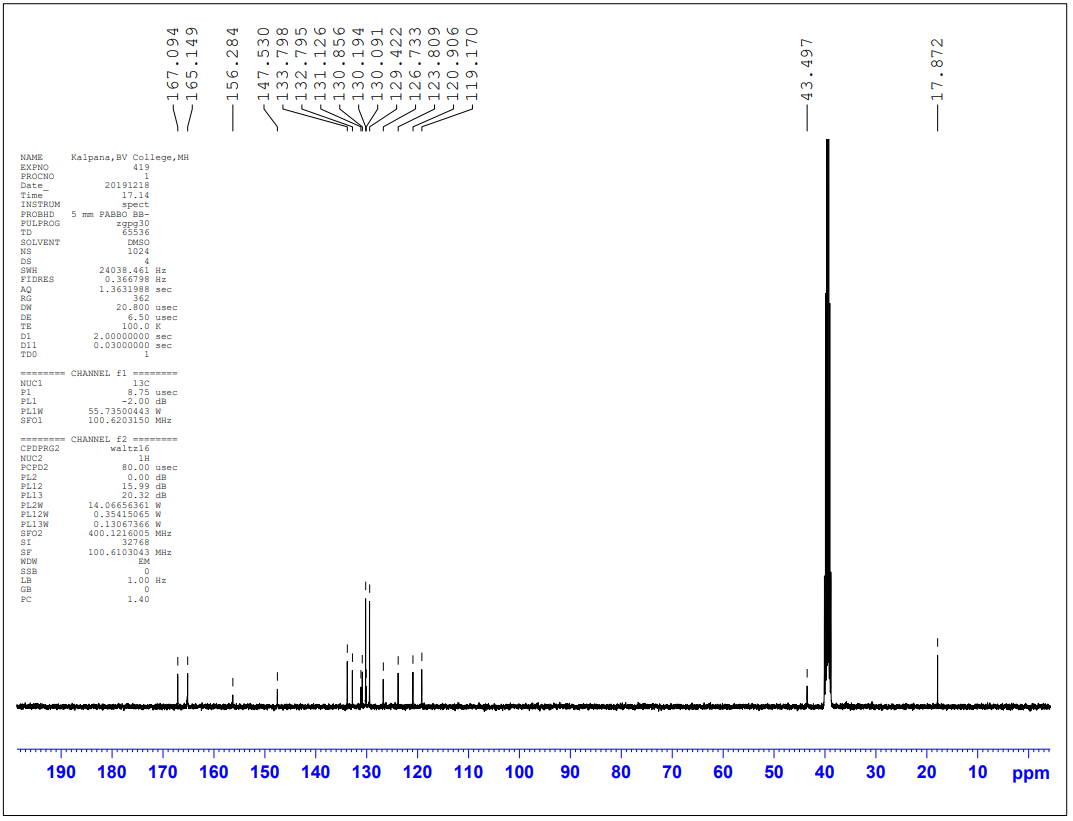
**

**4. HPLC Analysis**


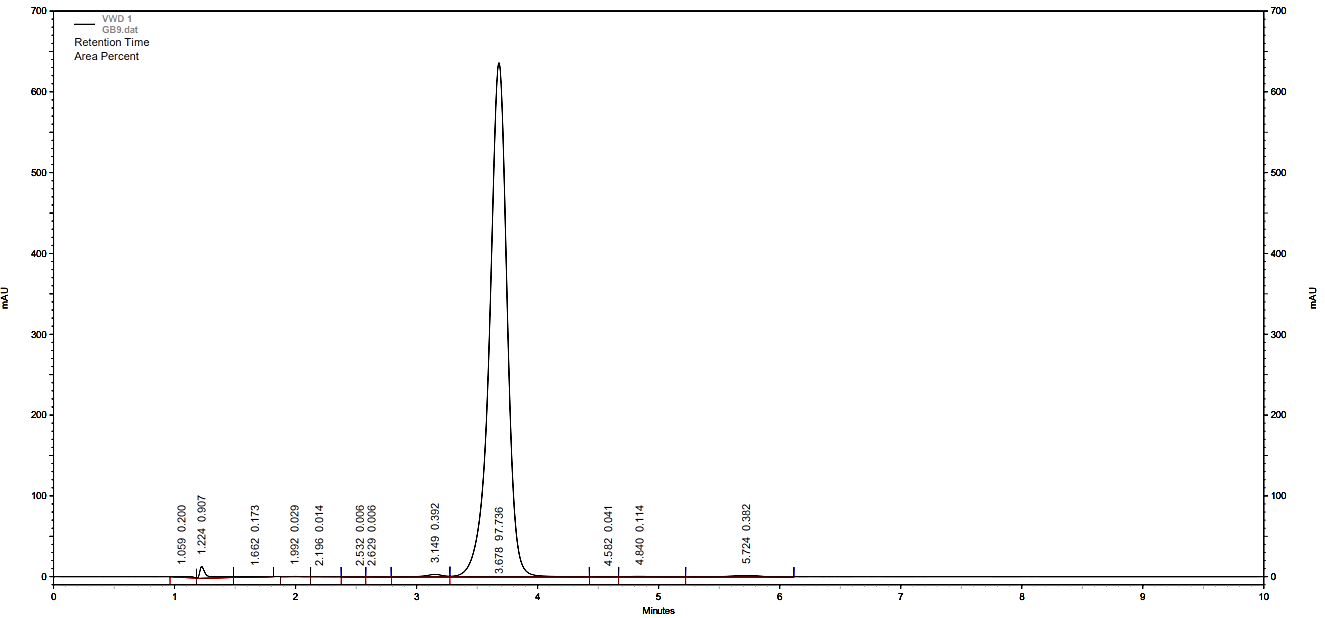


**5. Mass Spectrometry**

**
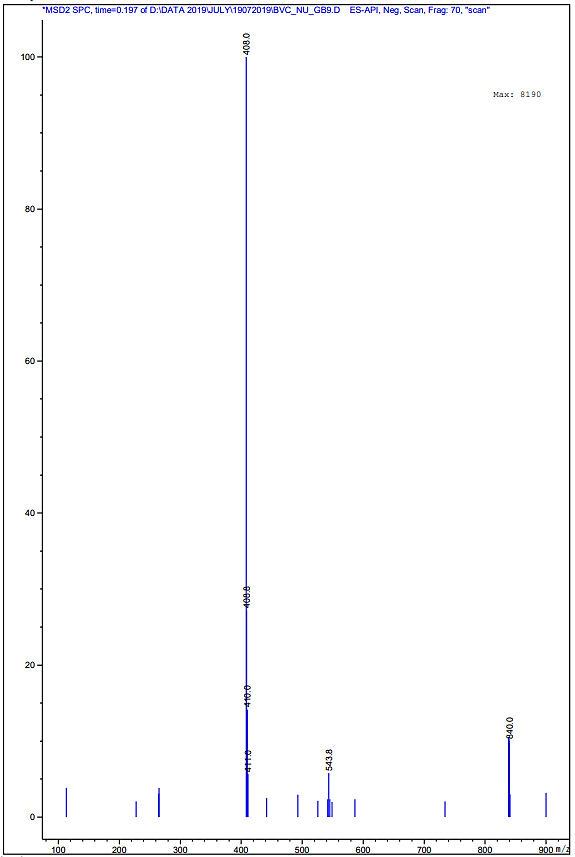
**

**6. UV**

**
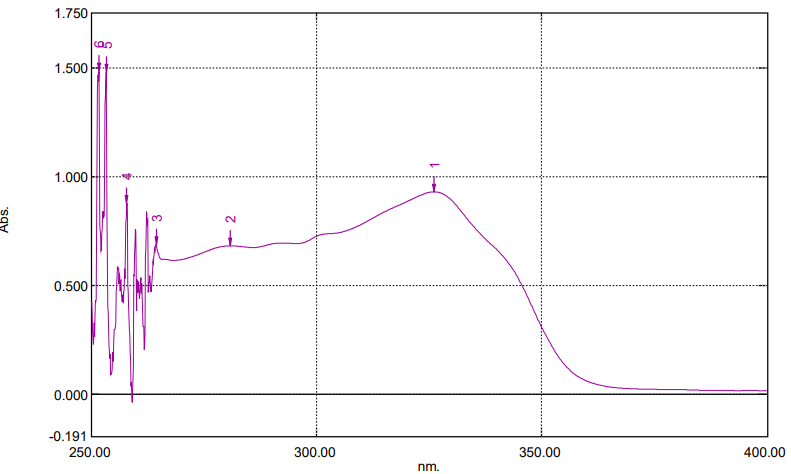
**

**N-(6-methylbenzo[d]thiazol-2-yl)-2-(5-(4-methylbenzylidene)-2,4-dioxothiazolidin-3-yl)acetamide (PB14)**

**1. FTIR**

**
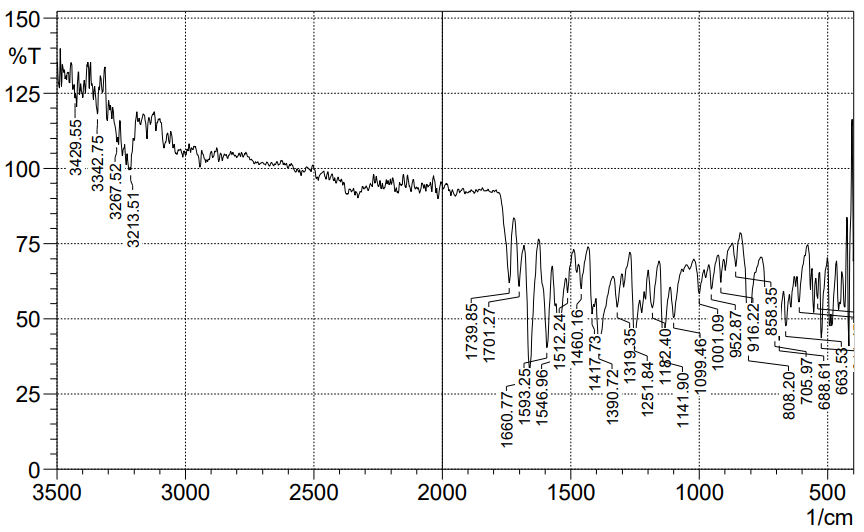
**

**2. IH-NMR**


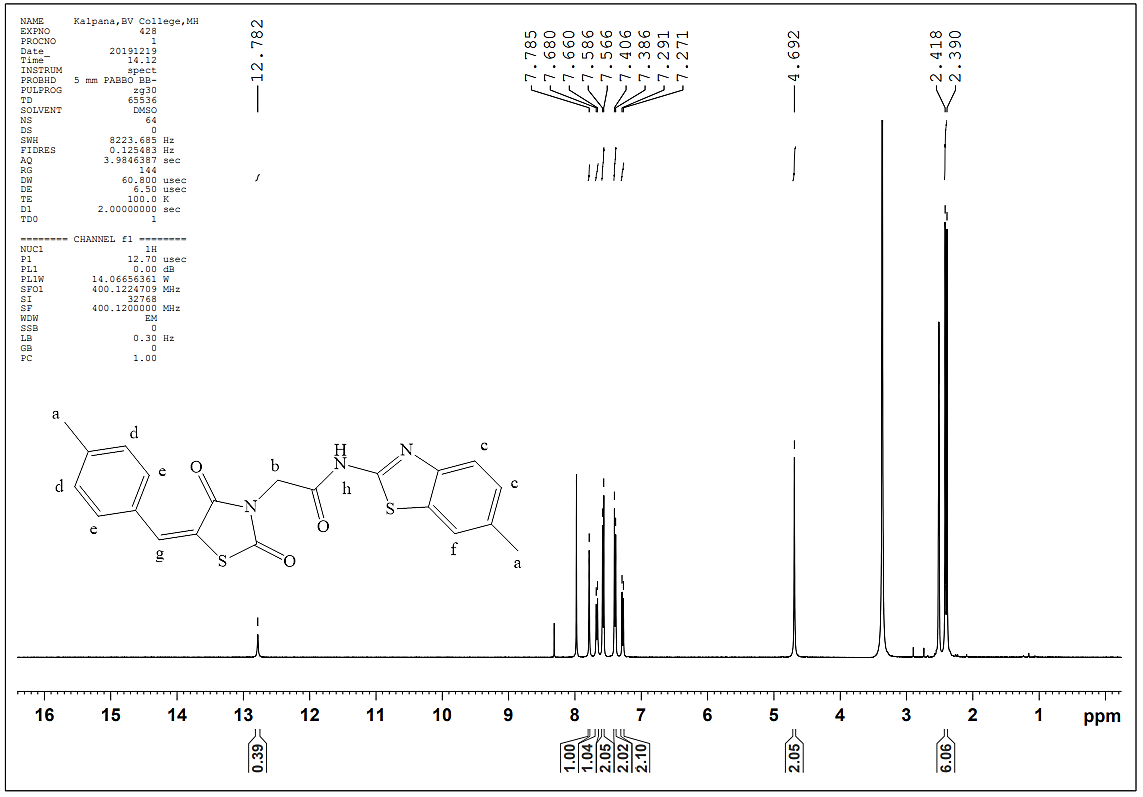


**3. 13C-NMR**

**
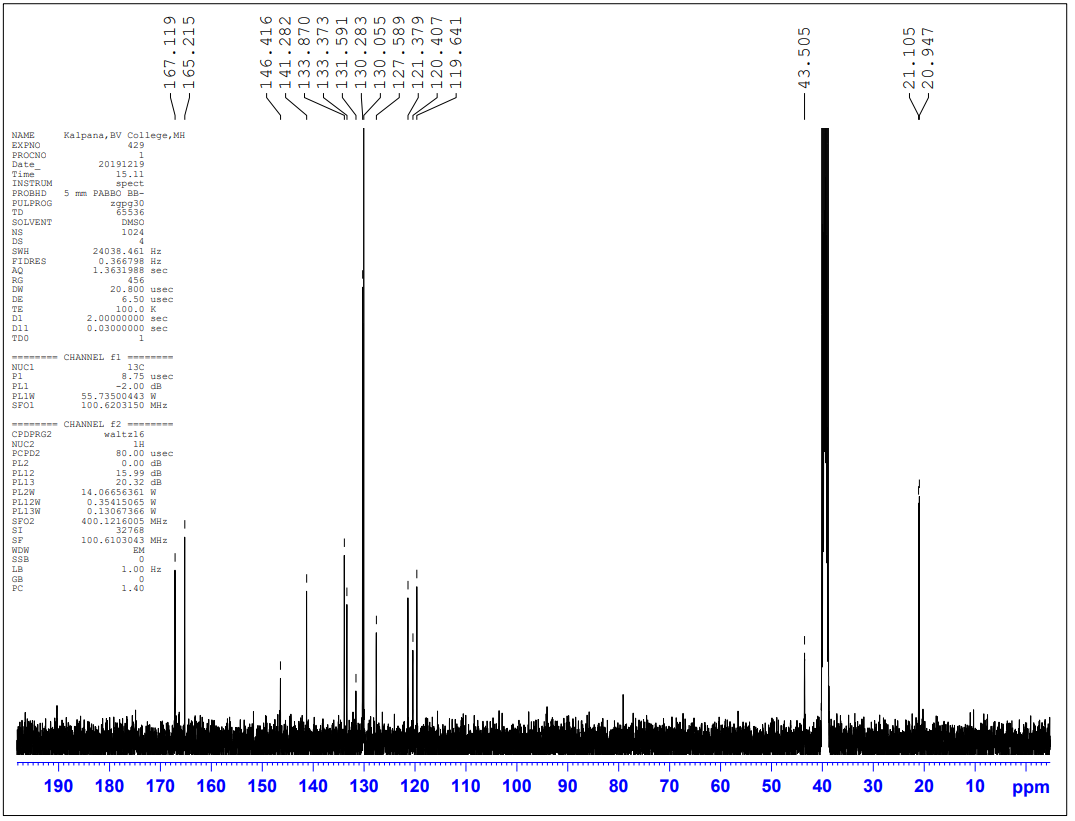
**

**4. HPLC Analysis**


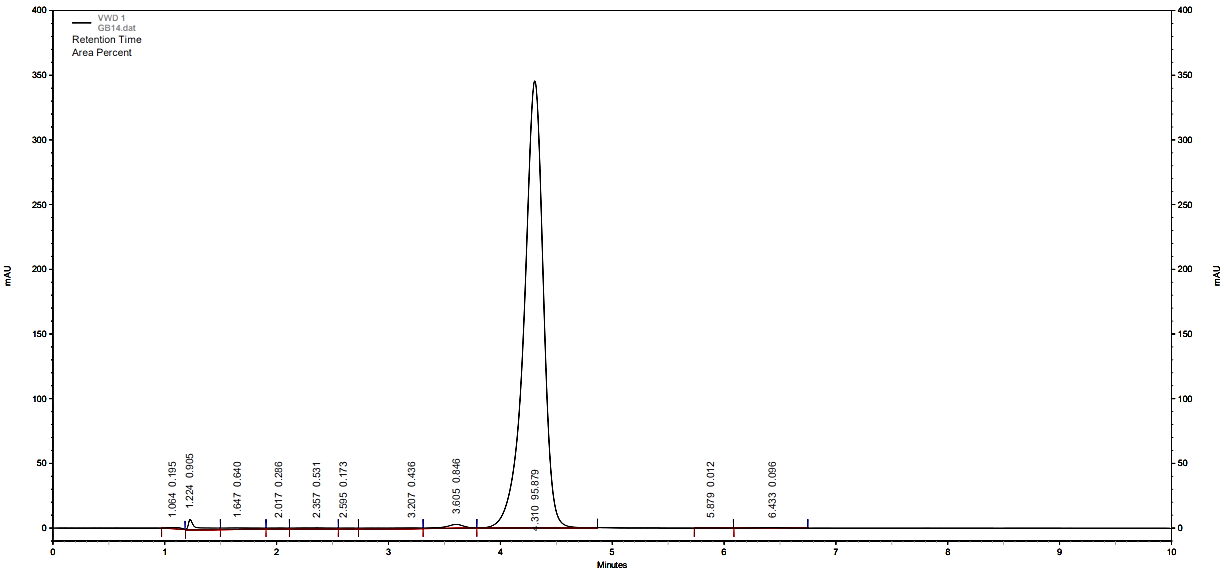


**5. Mass Spectrometry**

**
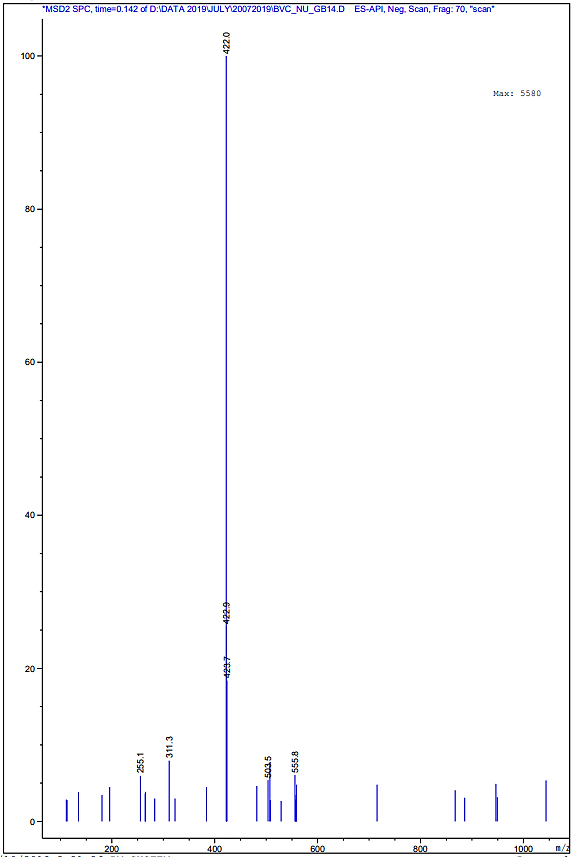
**

**6. UV**

**
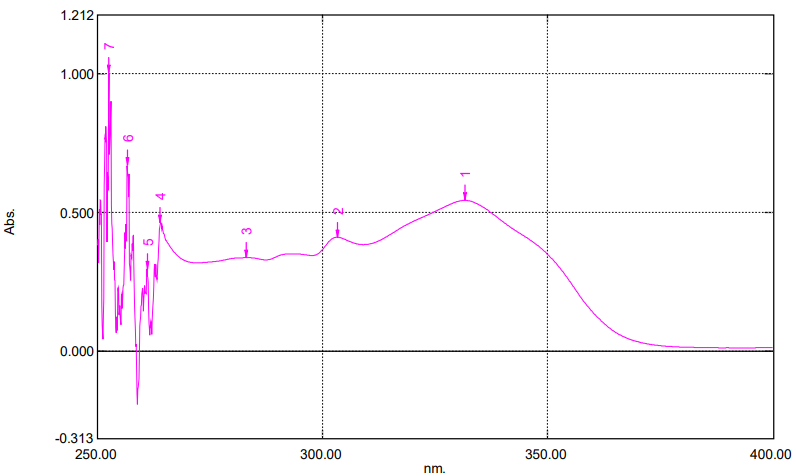
**

**2-(5-(3,4-dimethylbenzylidene)-2,4-dioxothiazolidin-3-yl)-N-(6-methylbenzo[d]thiazol-2-yl)acetamide (PB15)**

**1. FTIR –**

**
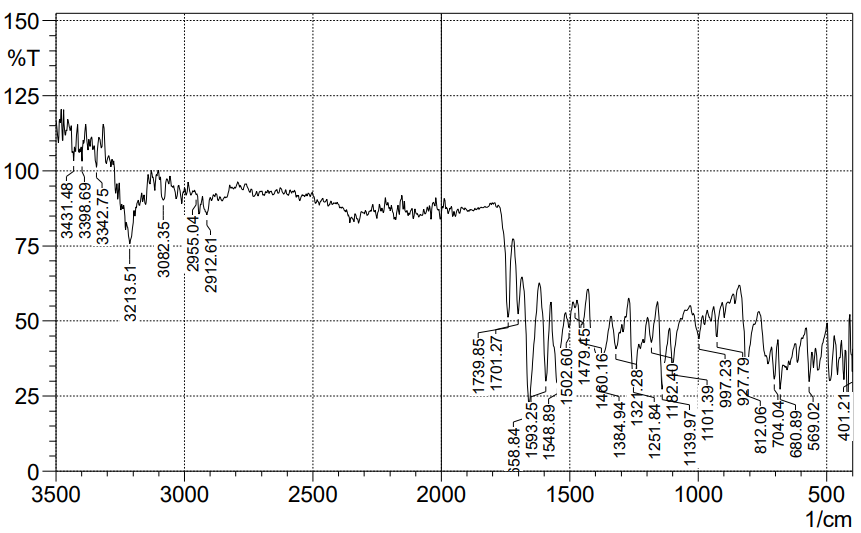
**

**2. IH-NMR**


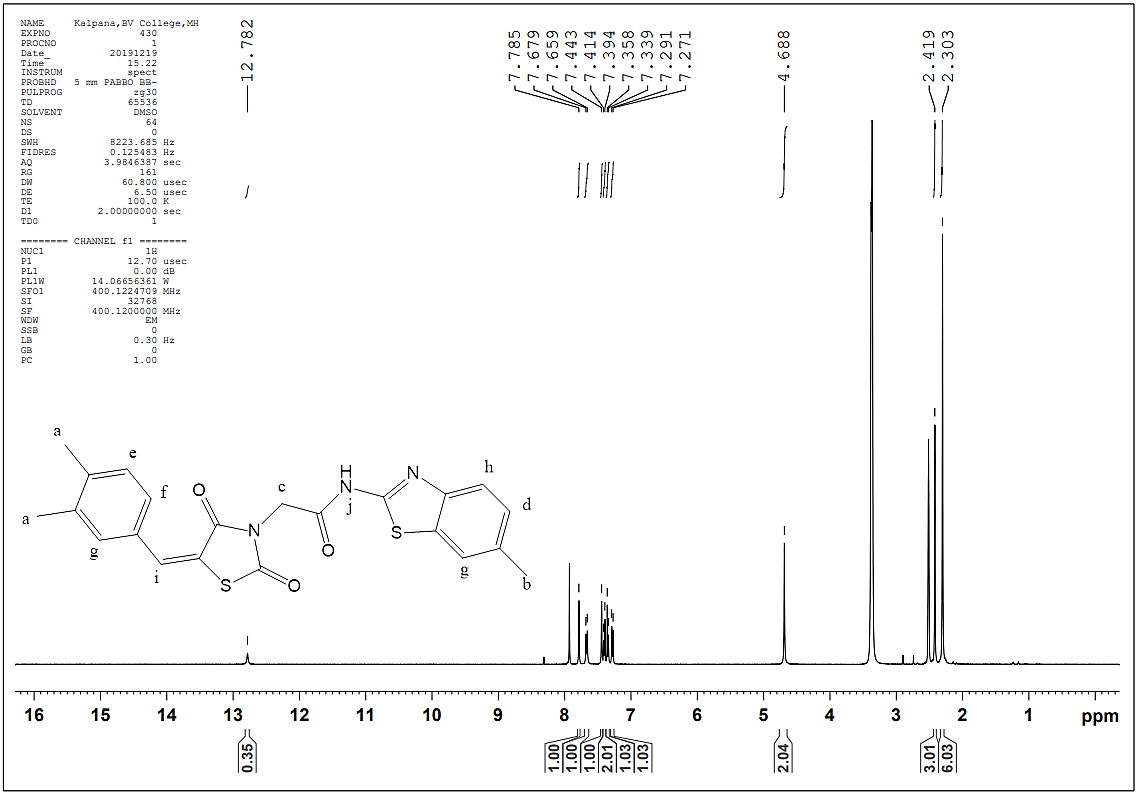


**3. 13C-NMR**

**
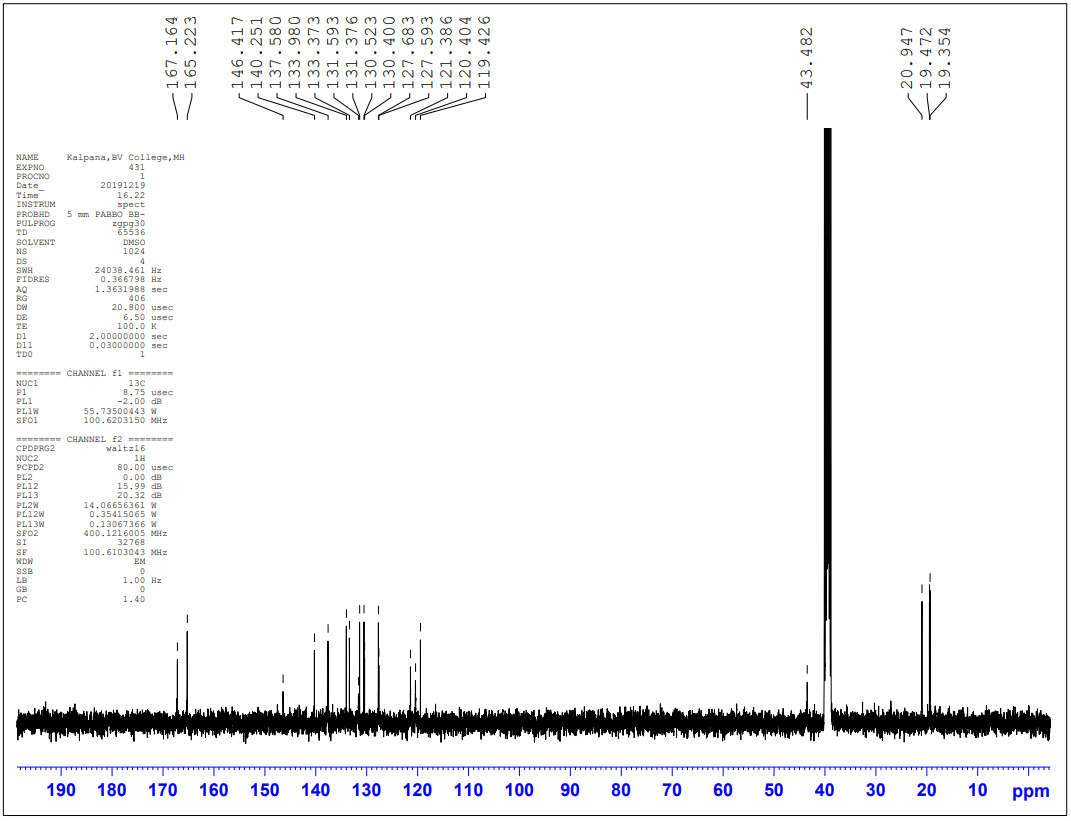
**

**4. HPLC Analysis**


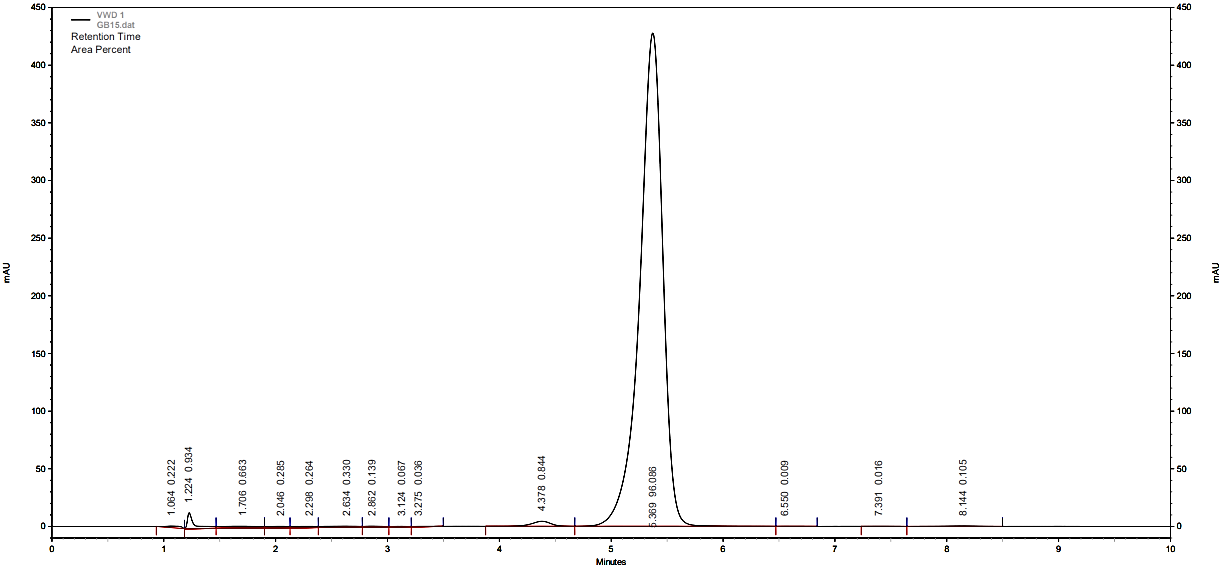


**5. Mass Spectrometry**

**
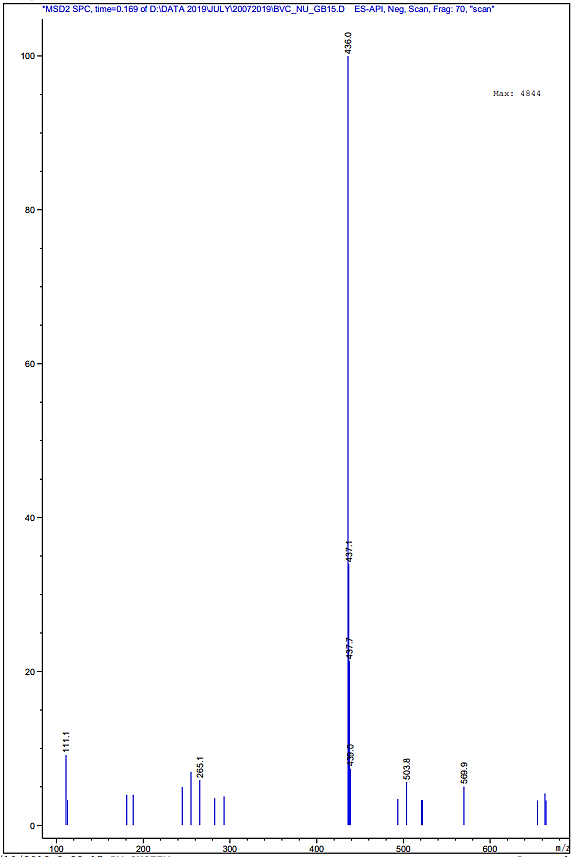
**

**6. UV**

**
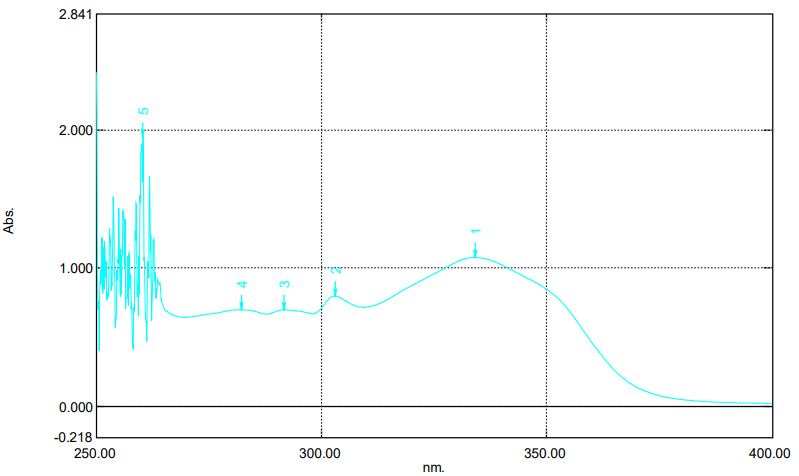
**

**2-(5-(4-chlorobenzylidene)-2,4-dioxothiazolidin-3-yl)-N-(6-methylbenzo[d]thiazol-2-yl)acetamide (PB16)**

**1. FTIR –**

**
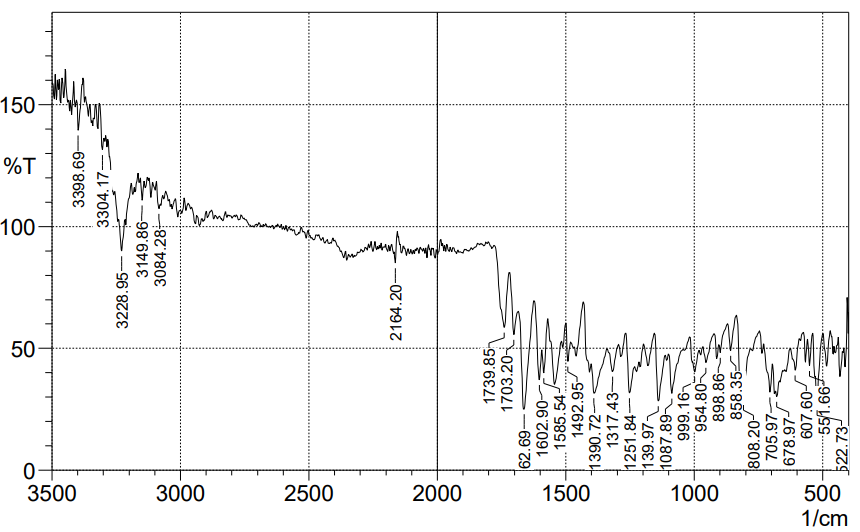
**

**2. IH-NMR**


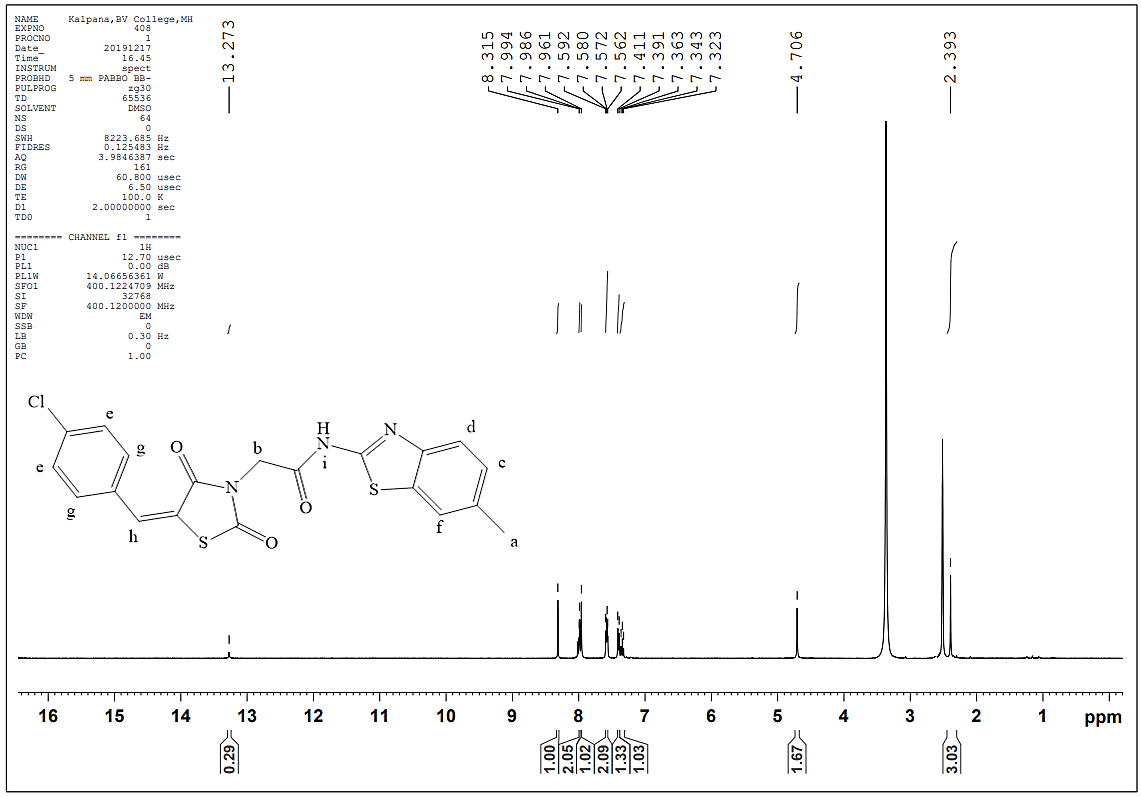


**3. 13C-NMR**

**
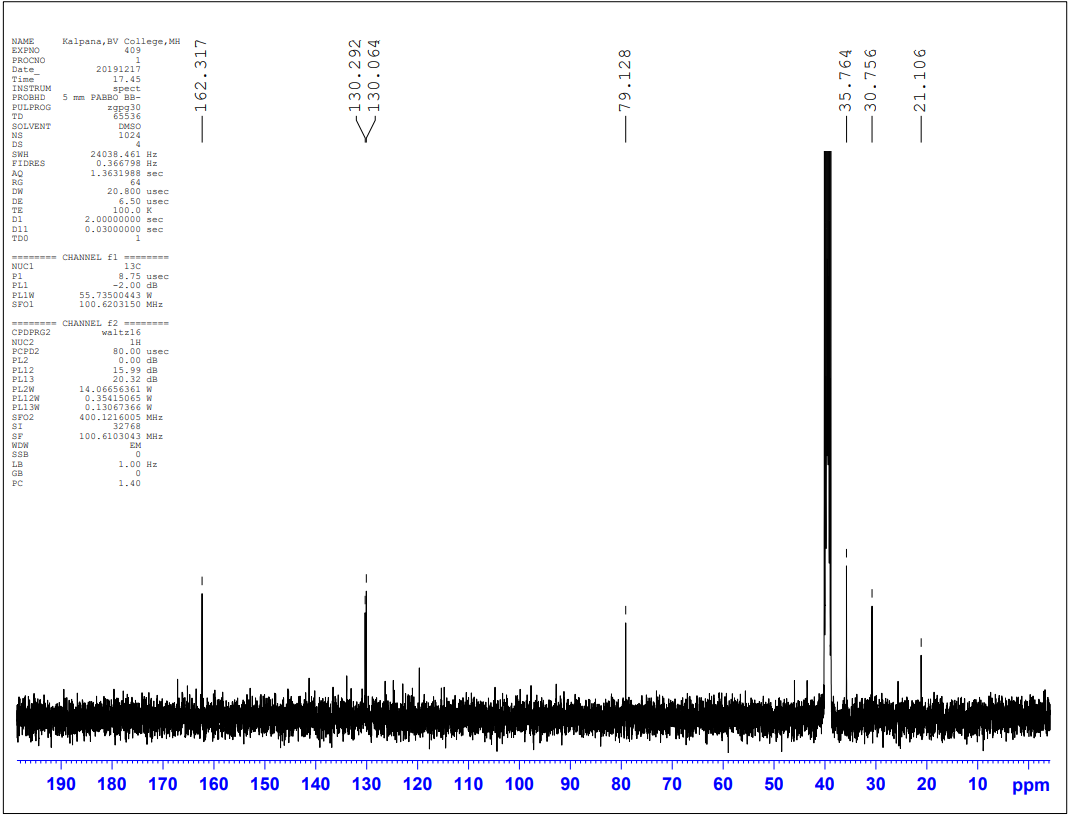
**

**4. HPLC Analysis**


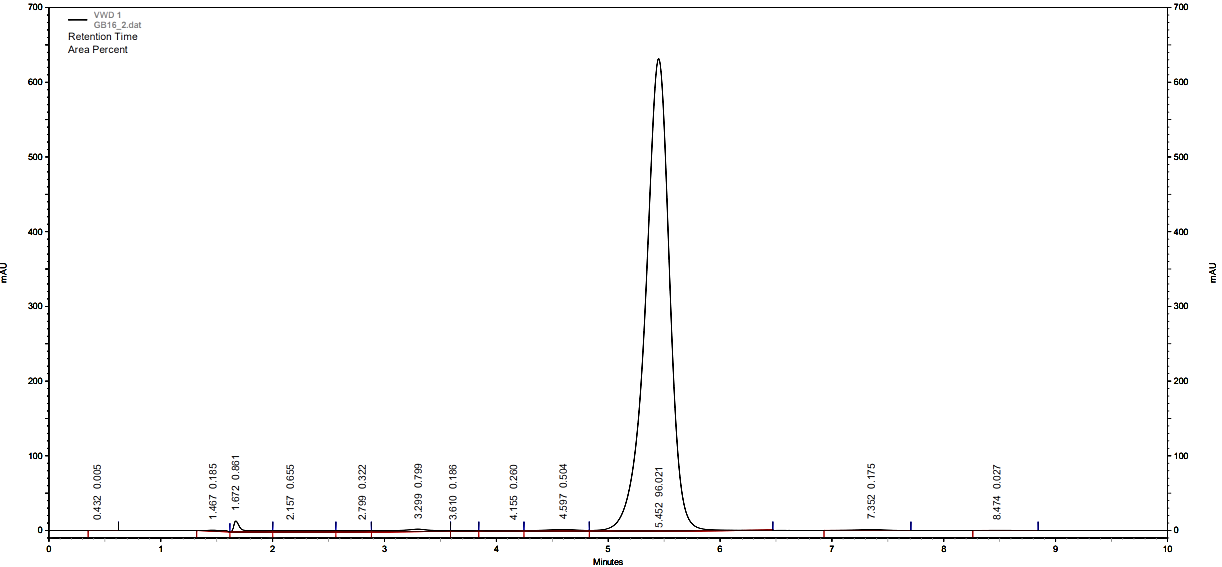


**5. Mass Spectrometry**

**
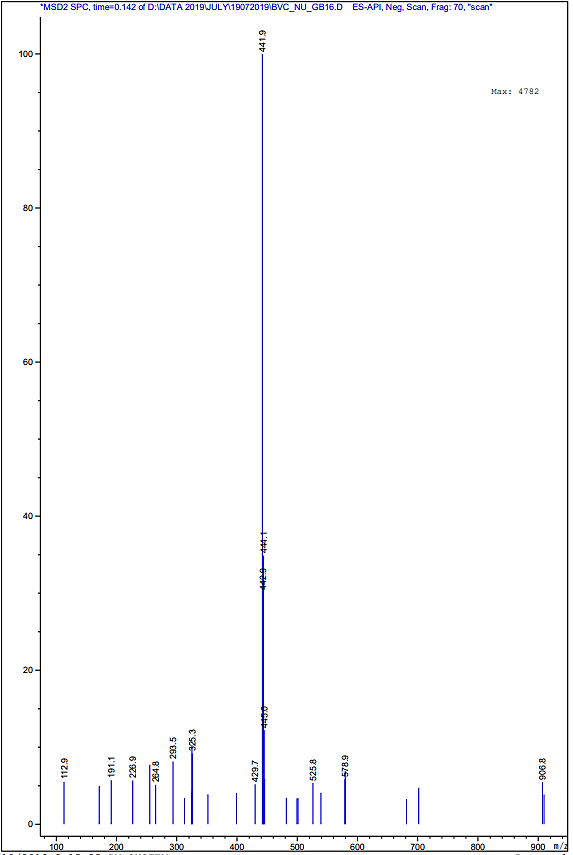
**

**6. UV**

**
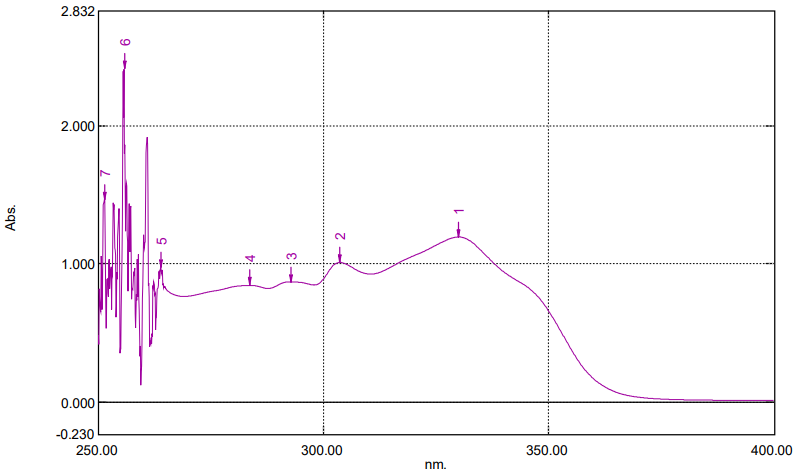
**

**2-(5-(4-chlorobenzylidene)-2,4-dioxothiazolidin-3-yl)-N-(6-ethoxybenzo[d]thiazol-2-yl)acetamide (PB17)**

**1. FTIR –**

**
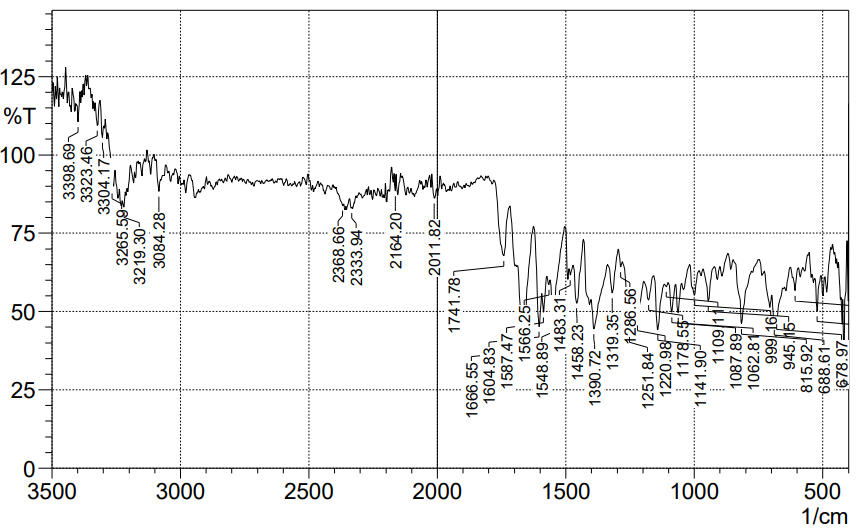
**

**2. IH-NMR**


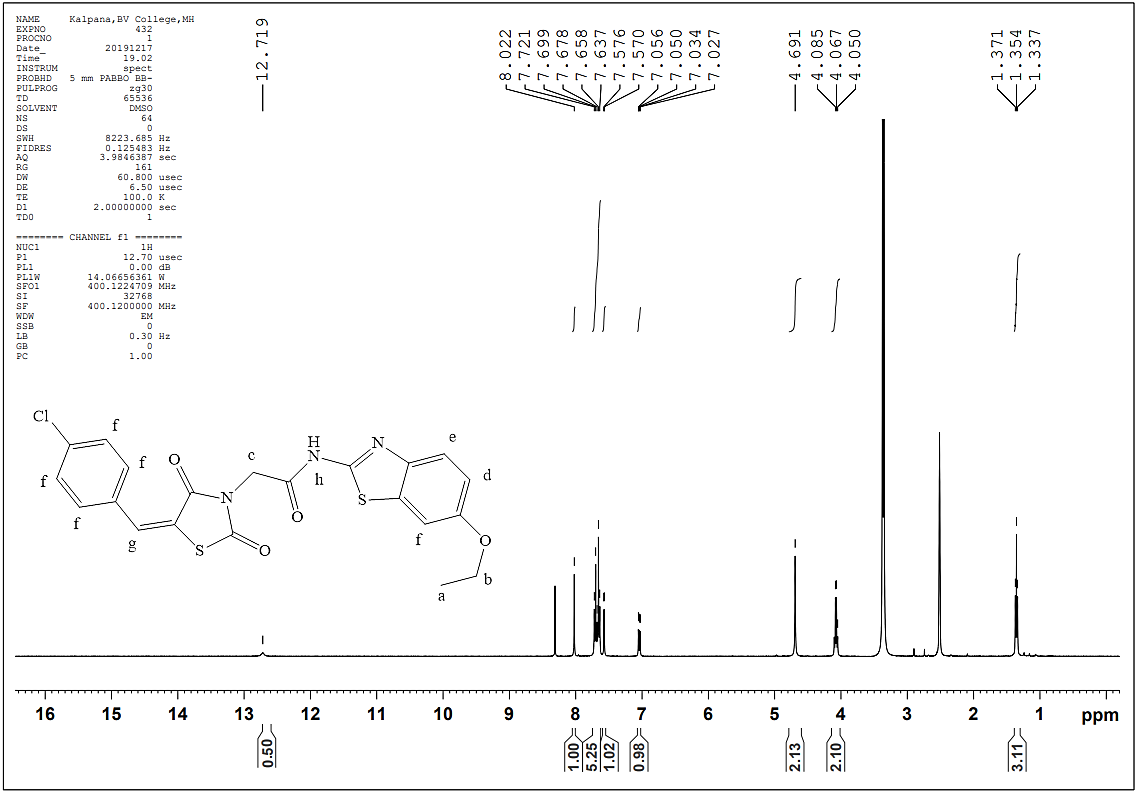


**3. 13C-NMR**

**
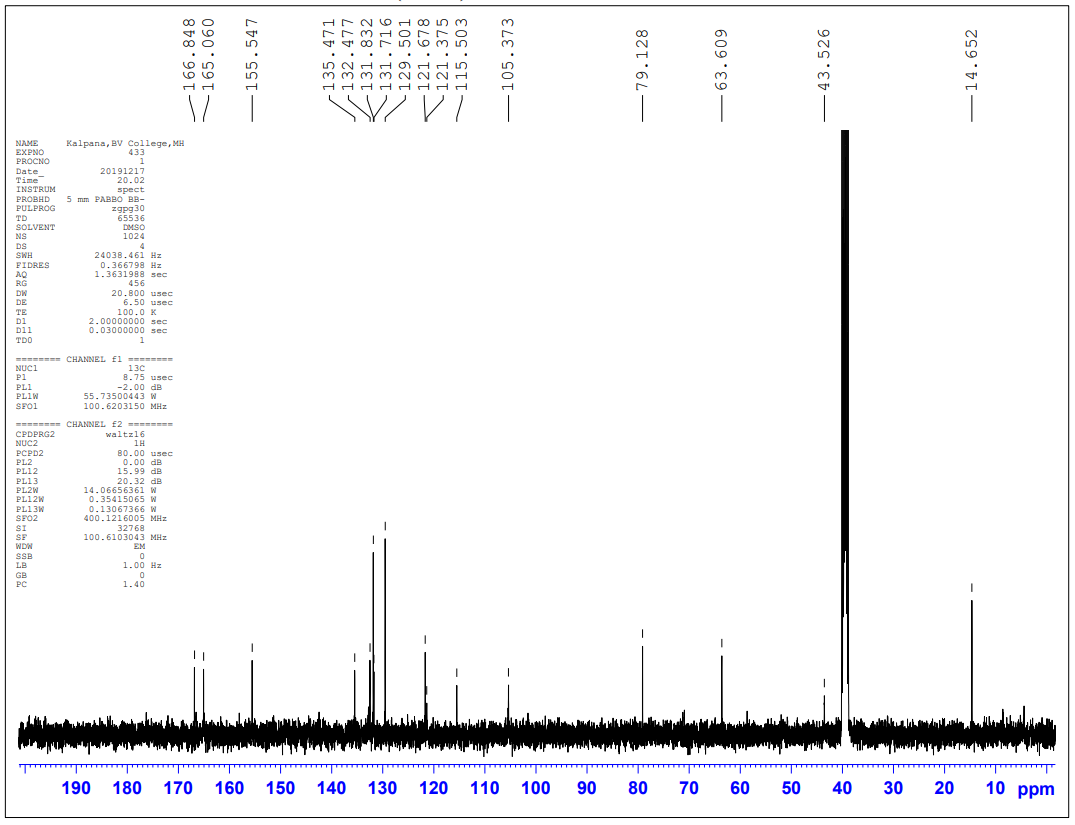
**

**4. HPLC Analysis**


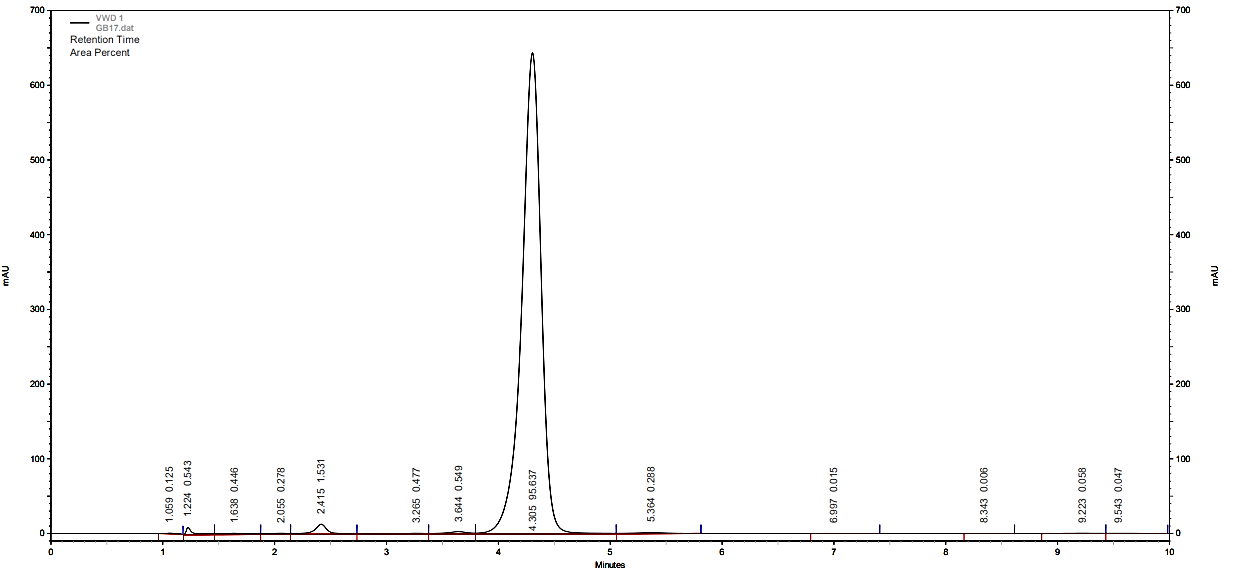


**5. Mass Spectrometry**

**
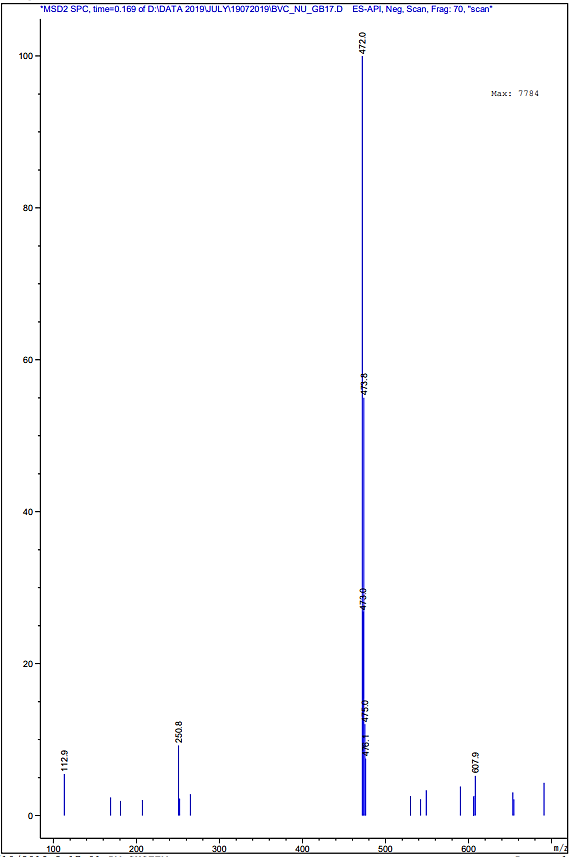
**

**6. UV**

**
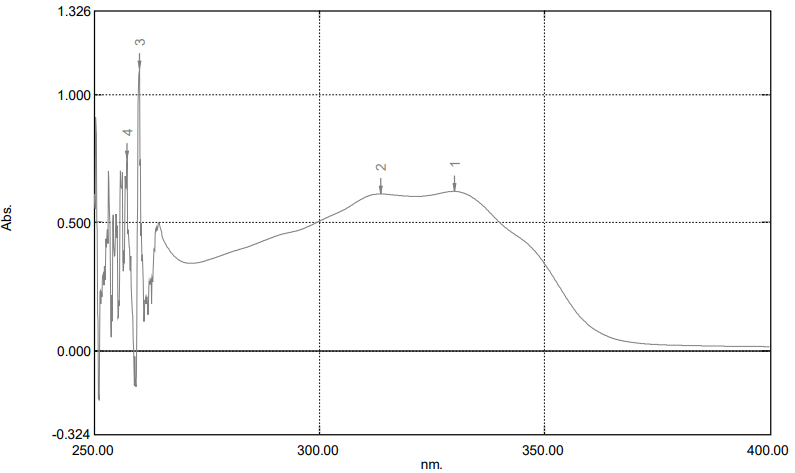
**

**N-(5,6-dimethylbenzo[d]thiazol-2-yl)-2-(5-(4-methylbenzylidene)-2,4-dioxothiazolidin-3-yl)acetamide (PB18)**

**1. FTIR**

**2. IH-NMR**

**3. 13C-NMR**

**4. HPLC Analysis**

**5. Mass Spectrometry**

**6. UV**

**2-(5-(4-chlorobenzylidene)-2,4-dioxothiazolidin-3-yl)-N-(5,6-dimethylbenzo[d]thiazol-2-yl)acetamide (PB19)**

**1. FTIR –**

**2. IH-NMR**

**3. 13C-NMR**

**4. HPLC Analysis**

**5. Mass Spectrometry**

**6. UV**

**N-(4-methoxybenzo[d]thiazol-2-yl)-2-(5-(4-methylbenzylidene)-2,4-dioxothiazolidin-3-yl)acetamide (PB20)**

**1. FTIR**

**2. IH-NMR**

**3. 13C-NMR**

**4. HPLC Analysis**

**5. Mass Spectrometry**

**6. UV**

**N-(6-fluorobenzo[d]thiazol-2-yl)-2-(5-(4-methylbenzylidene)-2,4-dioxothiazolidin-3-yl)acetamide (PB21)**

**1. FTIR**

**2. IH-NMR**

**3. 13C-NMR**

**4. HPLC Analysis**

**5. Mass Spectrometry**

**6. UV**

N'-((6-(2-(5-(4-fluorophenyl)-3-phenyl-4,5-dihydro-1H-pyrazol-1-yl)-2-oxoethoxy) naphthalen-2-yl)methylene)-4-hydroxybenzohydrazide (B1)

1. FTIR

2. 1H-NMR

3. 13C-NMR

4. HPLC

5. Mass

N'-((6-(2-(5-(2-chlorophenyl)-3-(4-fluorophenyl)-4,5-dihydro-1H-pyrazol-1-yl)-2-oxoethoxy) naphthalen-2-yl)methylene)-4-hydroxybenzohydrazide (B2)

1. FTIR

2. 1H-NMR

3. 13C-NMR

4. HPLC

5. Mass

N'-((6-(2-(3-(4-fluorophenyl)-5-(p-tolyl)-4,5-dihydro-1H-pyrazol-1-yl)-2-oxoethoxy) naphthalen-2-yl)methylene)-4-hydroxybenzohydrazide (B3)

1. FTIR

2. 1H-NMR

3. 13C-NMR

4. HPLC

5. Mass

N'-((6-(2-(3,5-bis(4-fluorophenyl)-4,5-dihydro-1H-pyrazol-1-yl)-2-oxoethoxy)naphthalen-2-yl)methylene)-4-hydroxybenzohydrazide (B4)

1. FTIR

2. 1H-NMR

3. 13C-NMR

4. HPLC

5. Mass

4-hydroxy-N'-((6-(2-oxo-2-(3-phenyl-5-(p-tolyl)-4,5-dihydro-1H-pyrazol-1-yl)ethoxy) naphthalen-2-yl)methylene)benzohydrazide (B5)

1. FTIR

2. 1H-NMR

3. 13C-NMR

4. HPLC

5. Mass

N'-((6-(2-(5-(2-chlorophenyl)-3-phenyl-4,5-dihydro-1H-pyrazol-1-yl)-2-oxoethoxy) naphthalen-2-yl)methylene)-4-hydroxybenzohydrazide (B6)

1. FTIR

2. 1H-NMR

3. 13C-NMR

4. HPLC

5. Mass

N'-((6-(2-(5-(furan-2-yl)-3-phenyl-4,5-dihydro-1H-pyrazol-1-yl)-2-oxoethoxy)naphthalen-2-yl)methylene)-4-hydroxybenzohydrazide (B7)

1. FTIR

2. 1H-NMR

3. 13C-NMR

4. HPLC

5. Mass

4-hydroxy-N'-((6-(2-oxo-2-(3-phenyl-5-(thiophen-2-yl)-4,5-dihydro-1H-pyrazol-1-yl)ethoxy) naphthalen-2-yl)methylene)benzohydrazide (B8)

1. FTIR

2. 1H-NMR

3. 13C-NMR

4. HPLC

5. Mass
